1 **WNT6-ACC2-induced accumulation of triacylglycerol rich lipid droplets is**  
2 **exploited by *M. tuberculosis***

3  
4 Julius Brandenburg<sup>1,16</sup>, Sebastian Marwitz<sup>2,14</sup>, Simone C. Tazoll<sup>1</sup>, Franziska Waldow<sup>3,14</sup>,  
5 Barbara Kalsdorf<sup>4,16</sup>, Tim Vierbuchen<sup>5</sup>, Thomas Scholzen<sup>6</sup>, Annette Gross<sup>1</sup>, Svenja  
6 Goldenbaum<sup>1</sup>, Alexandra Hölscher<sup>7</sup>, Martina Hein<sup>6</sup>, Lara Linnemann<sup>8</sup>, Maja Reimann<sup>4</sup>,  
7 Andreas Kispert<sup>9</sup>, Michael Leitges<sup>10</sup>, Jan Rupp<sup>11,16</sup>, Christoph Lange<sup>4,12,15,16</sup> Stefan  
8 Niemann<sup>13,15</sup>, Jochen Behrends<sup>6</sup>, Torsten Goldmann<sup>2,14</sup>, Holger Heine<sup>5</sup>, Ulrich E.  
9 Schaible<sup>8,16</sup>, Christoph Hölscher<sup>7,16</sup>, Dominik Schwudke<sup>3,14,16</sup> and Norbert Reiling<sup>1,16\*</sup>

10  
11 <sup>1</sup> Microbial Interface Biology, Research Center Borstel, Leibniz Lung Center, 23845  
12 Borstel, Germany;

13 <sup>2</sup> Pathology of the University Medical Center Schleswig-Holstein (UKSH), Campus  
14 Lübeck and the Research Center Borstel, Germany

15 <sup>3</sup> Bioanalytical Chemistry, Research Center Borstel, Germany;

16 <sup>4</sup> Clinical Infectious Diseases, Research Center Borstel, Germany;

17 <sup>5</sup> Innate Immunity, Research Center Borstel, Germany;

18 <sup>6</sup> Fluorescence Cytometry Core Unit, Research Center Borstel, Germany;

19 <sup>7</sup> Infection Immunology, Research Center Borstel, Germany;

20 <sup>8</sup> Cellular Microbiology, Research Center Borstel, Germany;

21 <sup>9</sup> Institut für Molekularbiologie, Medizinische Hochschule Hannover, 30625 Hannover,  
22 Germany;

23 <sup>10</sup> Division of BioMedical Sciences / Faculty of Medicine, Memorial University of  
24 Newfoundland, 300 Prince Philip Drive, St. John`s, Newfoundland, Canada A1B

25 <sup>11</sup> Department of Infectious Diseases and Microbiology, University of Lübeck, 23538  
26 Lübeck

27 <sup>12</sup> International Health/Infectious Diseases, University of Lübeck, Lübeck, Germany;

28 <sup>13</sup> Molecular and Experimental Mycobacteriology, Research Center Borstel, Germany;

29 <sup>14</sup> Airway Research Center North (ARCN), Member of the German Center for Lung  
30 Research (DZL);

31 <sup>15</sup> Department of Medicine, Karolinska Institute, Stockholm, Sweden;

32 <sup>16</sup> German Center for Infection Research (DZIF), Site Hamburg-Lübeck-Borstel-Riems,  
33 Germany;

34

35 \*e-mail: nreiling@fz-borstel.de

36 **Abstract:**

37 In view of emerging drug-resistant tuberculosis, host directed therapies are urgently  
38 needed to improve treatment outcomes with currently available anti-tuberculosis  
39 therapies. One option is to interfere with the formation of lipid-laden “foamy”  
40 macrophages in the infected host. Here, we provide evidence that WNT6, a member of  
41 the evolutionary conserved WNT signaling pathway, promotes foam cell formation by  
42 regulating key lipid metabolic genes including acetyl-CoA carboxylase-2 (ACC2) during  
43 pulmonary TB. In addition, we demonstrate that *Mycobacterium tuberculosis* (Mtb)  
44 facilitates its intracellular growth and dissemination in the host by exploiting the WNT6-  
45 ACC2 pathway. Using genetic and pharmacological approaches, we show that lack of  
46 functional WNT6 or ACC2 significantly reduces intracellular TAG levels, Mtb growth and  
47 necrotic cell death of macrophages. In combination with the anti-TB drug isoniazid,  
48 pharmacological inhibition of ACC2 improved anti-mycobacterial treatment *in vitro* and  
49 *in vivo*. Therefore, we propose the WNT6-ACC2 signaling pathway as a promising target  
50 for a host-directed therapy to reduce intracellular replication of Mtb by modulating  
51 neutral lipid metabolism.

51 **Introduction:**

52 Tuberculosis (TB) is the leading cause of death from a single infectious agent<sup>1</sup>. The  
53 current increase in the numbers of patients affected by multidrug-resistant (MDR) and  
54 rifampicin-resistant (MDR/RR)-TB<sup>2</sup> severely jeopardizes control of the TB epidemic as  
55 envisaged by the WHO “EndTB” strategy<sup>1</sup>. A novel and innovative approach to fight  
56 disease without incurring the risk of bacterial resistance development is to target host  
57 factors that facilitate *Mycobacterium tuberculosis* (Mtb) replication<sup>3</sup>.

58 As an intracellular pathogen, Mtb has evolved to reside within the hostile environment  
59 of macrophages<sup>4</sup>. These cells serve as the main host cell for Mtb but are also able to  
60 restrict infection when appropriately activated. In response to signals such as hypoxia<sup>5</sup>,  
61 microbial structures<sup>6</sup> and Mtb infection<sup>7</sup>, macrophages undergo a substantial metabolic  
62 shift away from oxidative metabolism towards glycolysis. Rewiring of cellular metabolism  
63 is necessary to mediate macrophage activation<sup>8</sup>, pro-inflammatory polarization<sup>9</sup> and to  
64 control Mtb growth<sup>10,11</sup>. These activating signals, however, also promote the  
65 accumulation of neutral lipids in macrophages as fatty acid oxidation is down-  
66 regulated<sup>12,13</sup>.

67 Macrophages with a “foamy”, neutral lipid-rich phenotype are abundantly found in the  
68 Mtb-infected human lung and particularly in TB granulomas<sup>14–16</sup>. Moreover, in  
69 progressive post-primary TB, infection is restricted to these cells<sup>16,17</sup>. Foamy  
70 macrophages accumulate triacylglycerols (TAGs) and cholesterolesters (CEs) in  
71 cytoplasmic compartments termed lipid droplets. Cholesterol<sup>18</sup> and fatty acid<sup>19</sup> utilization  
72 is known to be critical for Mtb growth *in vivo*. Foam cell formation is linked to bacterial  
73 persistence, as Mtb is repeatedly found in close proximity to lipid droplets<sup>14</sup> and utilizes  
74 fatty acids derived from host TAGs<sup>20</sup>. Importantly, the presence of foamy macrophages  
75 was associated with progressive TB pathology due to a temporal and spatial correlation

76 between the death of foamy macrophages and granuloma evolvment towards tissue  
77 necrosis ultimately leading to the release of mycobacteria into the airways<sup>21</sup>. Thus,  
78 interfering with foam cell formation during infection may deprive Mtb of essential  
79 nutrients within its intracellular niche and restrict bacterial dissemination.

80 The Wingless/Integrase 1 (WNT) signaling pathway, which is evolutionarily highly  
81 conserved in multicellular eukaryotic organisms (metazoa), comprises 19 extracellular  
82 WNT ligands in men and mice<sup>22</sup>. WNT signaling regulates basic processes such as  
83 proliferation, differentiation and death in virtually all cells including immune cells<sup>23,24</sup>.  
84 Previously, we reported that Mtb infection induces expression of WNT6 in macrophages,  
85 which acts as an anti-inflammatory feedback regulator dampening responses to  
86 mycobacteria<sup>25</sup>. Moreover, we found WNT6 predominantly expressed in a subset of lipid  
87 droplet-rich macrophages *in vivo*<sup>25</sup>. In the current study, we demonstrate that WNT6 is  
88 a foam cell-promoting factor during Mtb infection. We provide evidence that WNT6-  
89 induced acetyl-CoA carboxylase 2 (ACC2) activity in macrophages and mice mediates  
90 a metabolic shift away from fatty acid oxidation towards TAG synthesis, which is utilized  
91 by Mtb for intracellular replication.

92

93 **Results:**

94 **WNT6 is expressed in foamy macrophages during pulmonary TB**

95 We have previously reported that WNT6 is expressed in granulomatous infiltrations in  
96 the lungs of C57Bl/6 mice experimentally infected with *Mtb*<sup>25</sup>. To extend this observation  
97 to human pulmonary TB, we stained lung tissue samples of three independent TB  
98 patients, who have undergone resection of infected lung tissue, with an antibody  
99 directed against WNT6 (Figure 1 and S1a-c). WNT6 protein expression was found in  
100 cells within nascent granulomas but also in the periphery of necrotizing granulomas  
101 (black arrows, Figure 1a). We found WNT6 expression almost exclusively in cells  
102 positive for the monocyte/macrophage marker CD68 as revealed by  
103 immunofluorescence analyses (Fig. 1c) and immunohistochemical analyses (Fig. S1  
104 a,b). Thus, WNT6 protein expression during *Mtb* infection in humans is restricted to cells  
105 of the myeloid lineage, corroborating previous observations in mice<sup>25</sup>. Of note, WNT6  
106 was prominently expressed in cells with a foam cell morphology (black arrows, Figure  
107 1b). Consistent with that, cells strongly expressing WNT6 (Figure S1d) also showed  
108 prominent staining for the lipid droplet scaffolding protein Perilipin2<sup>15</sup> (PLIN2) (Figure  
109 S1e).

110 To further correlate WNT6 expression to the presence of neutral lipids, we analyzed  
111 interleukin (IL)-13-overexpressing mice, which develop a human-like pathology upon  
112 *Mtb* infection including centrally necrotizing granulomas with an adjacent zone of foamy  
113 macrophages containing numerous lipid droplets (Figure S2a, b and<sup>26</sup>). In these *IL-13*  
114 overexpressing mice, an intense WNT6 expression (Figure 1d, left panel, red) was found  
115 in areas of prominent neutral lipid accumulation as visualized by staining with the neutral  
116 lipid dye BODIPY 493/503<sup>27</sup> (Figure 1d, middle panel, green and Figure S2c). Together,

117 these findings associate WNT6 to the presence of lipid droplet-rich macrophages in  
118 pulmonary TB.

119

### 120 **WNT6 drives accumulation of TAG-rich lipid droplets**

121 We hypothesized that WNT6 expression is functionally linked to the acquisition of a  
122 “foamy”, lipid droplet-rich phenotype. To demonstrate this, we analyzed WNT6-  
123 overexpressing NIH3T3 cells and visualized neutral lipids by use of BODIPY 493/503.  
124 Fluorescence microscopic analysis revealed an enhanced number of neutral lipid-rich  
125 structures (Figure 2a, BODIPY, green) in WNT6-overexpressing NIH3T3 cells when  
126 compared to control cells, a finding that was independently confirmed by flow cytometry  
127 (Figure 2b). Consistent with this, mass spectrometry-based lipid analysis revealed a  
128 significantly increased abundance of TAGs in WNT6-overexpressing cells when  
129 compared to control cells (Figure 2c). In contrast, the abundance of membrane lipids  
130 such as phosphatidylcholines (PCs) remained unchanged (Figure S3a), while the  
131 abundance of other neutral lipids species such as cholesterolesters were even  
132 decreased (data not shown). To extend these findings to macrophages, *Mtb*’s main host  
133 cells, we next analyzed bone marrow- derived macrophages (BMDMs) from WNT6-  
134 competent (*Wnt6*<sup>+/+</sup>) and WNT6-deficient (*Wnt6*<sup>-/-</sup>) mice in the presence of the dietary  
135 fatty acid oleic acid conjugated to bovine serum albumin (BSA)<sup>27</sup>. Treatment with oleate-  
136 BSA induced lipid droplet formation and enhanced TAG abundance in *Wnt6*<sup>+/+</sup> BMDMs  
137 when compared to control cells as quantified by mass spectrometry (Figure 2e). The  
138 presence of lipid droplets and TAG levels were strongly reduced in *Wnt6*<sup>-/-</sup> macrophages  
139 when compared to wild-type cells (Figure 2d and 2e). Phosphatidylcholine (PC) levels,  
140 which increased upon oleate treatment (PC 36:2), remained comparable between *Wnt6*

141  $^{+/+}$  and  $Wnt6^{-/-}$  cells (Figure S3b), supporting the notion that WNT6 specifically promotes  
142 synthesis of TAG-rich lipid droplets.

143 As these results demonstrate that WNT6 regulates macrophage metabolism, we studied  
144 the influence of  $Wnt6$ -deficiency on mitochondrial activity using an extracellular flux  
145 analyzer. We observed similar oxygen consumption rates (OCR) between  $Wnt6^{+/+}$  and  
146  $Wnt6^{-/-}$  macrophages when cultivating them under control conditions (BSA, Figure 2f,  
147 left panel). However, basal as well as maximal respiration measured by the OCR were  
148 substantially increased in the absence of WNT6 when treated with oleate-BSA (Figure  
149 2f, right panel). An enhanced oxidative metabolic activity in  $Wnt6$ -deficient cells upon  
150 fatty acid supplementation indicates that WNT6 inhibits mitochondrial fatty acid oxidation  
151 and thereby shifts fatty acid metabolism towards neutral lipid synthesis and intracellular  
152 storage through the accumulation of lipid droplets.

153 Next, we assessed whether WNT6 regulates neutral lipid metabolism in *in vivo*  
154 differentiated macrophages in the absence or presence of Mtb. We isolated peritoneal  
155 macrophages from  $Wnt6^{+/+}$  and  $Wnt6^{-/-}$  mice, which were infected with mCherry-  
156 expressing Mtb for 24h and analyzed by fluorescence microscopy (Figure 2g,h). Neutral  
157 lipid levels as determined by BODIPY 493/503 staining were significantly lower in  
158 uninfected cells from  $Wnt6^{-/-}$  mice compared to  $Wnt6^{+/+}$  mice (Figure 2h), suggesting  
159 that disrupted WNT6 signaling affects neutral lipid levels under homeostatic conditions.  
160 Mtb infection - independently of the presence of WNT6 - enhances the amounts of  
161 intracellular neutral lipids by ~30% when compared to uninfected cells (Figure 2h), which  
162 is consistent with data from a recent study<sup>28</sup>. A significant reduction of BODIPY  
163 fluorescence by ~45% was observed in both, uninfected and Mtb-infected peritoneal  
164 macrophages from  $Wnt6^{-/-}$  mice when compared to respective  $Wnt6^{+/+}$  cells (Figure 2h).  
165 Our data show that WNT6-dependent and WNT6-independent pathways contribute to  
166 the accumulation of lipid droplets in *in vivo* differentiated macrophages. Taken together,

167 our findings demonstrate that WNT6 drives the accumulation of TAG-rich lipids droplets  
168 in the absence and presence of Mtb.

169

170 **WNT6 induces expression of lipid metabolic enzymes critical for TAG synthesis**  
171 **and lipid droplet accumulation**

172 To identify the cellular processes that are altered in the absence of *Wnt6*, we conducted  
173 a microarray-based gene expression analysis comparing Mtb-infected *Wnt6<sup>+/+</sup>* and  
174 *Wnt6<sup>-/-</sup>* macrophages. By performing a gene set enrichment analysis (GSEA)<sup>29</sup> utilizing  
175 gene sets from the peer-reviewed Reactome pathway database, we identified  
176 “Metabolism of Lipids and Lipoproteins” on rank 4 (FDR q-value,  $2.58e^{-13}$ ) under the top  
177 10 of enriched gene sets (Figure S4a) along with other expected sets of genes such as  
178 “Immune system”, “Cell cycle” and “Development Biology”, which corroborate previous  
179 data<sup>25</sup>. In-depth analysis revealed that genes encoding key factors involved in fatty acid  
180 uptake (*Cd36*, cluster of differentiation 36)<sup>30</sup>, activation (*Acs15*, long-chain-fatty-acid-  
181 CoA ligase 5)<sup>31</sup>, and mitochondrial oxidation (*Acad8*, acyl-CoA dehydrogenase family  
182 member 8, ) are significantly up-regulated in *Wnt6<sup>-/-</sup>* cells (Figure 3a). Of note, *Wnt6<sup>-/-</sup>*  
183 cells showed a strong up-regulation of *Cpt1b*, a gene encoding for an isoform of CPT1,  
184 the rate-limiting enzyme in mitochondrial beta-oxidation<sup>32</sup> (Figure 3a). Consistent with  
185 these observations, *Wnt6<sup>-/-</sup>* cells exhibited decreased mRNA expression of genes  
186 associated with fatty acid synthesis (*Acot1*, acyl-CoA thioesterase 1<sup>33</sup>; *Fads6*, fatty acid  
187 desaturase 6; *Elovl2*, elongation of very long chain fatty acids 2)<sup>34</sup>) and storage of fatty  
188 acids or other lipids (*Bdh1*, 3-hydroxybutyrate dehydrogenase 1) (Figure 3b). Moreover,  
189 expression of the key enzyme in TAG synthesis acyl-CoA:diacylglycerol acyltransferase  
190 (*Dgat2*)<sup>35</sup> and the lipid droplet scaffolding protein perilipin3 (*Plin3*)<sup>36</sup> were down-  
191 regulated when compared to *Wnt6<sup>+/+</sup>* cells. Microarray data also identified a strongly



192 reduced expression of acetyl-CoA carboxylase-2 (*Acacb*, ACC2) (Figure 3b), which acts  
193 as a key regulator of fatty acid oxidation through CPT1 inhibition<sup>37,38</sup> thereby promoting  
194 cellular lipid storage<sup>39</sup>.

195 Validation by qRT-PCR confirmed that there is indeed an inverse correlation between  
196 the expression of *Acacb* and *Cpt1b* depending on the presence of WNT6 (Figure 3c).  
197 *Acacb* expression levels were increased upon Mtb infection (24 hours p.i.) in *Wnt6*<sup>+/+</sup>  
198 cells in a MOI dependent manner, while mRNA levels remained at baseline in *Wnt6*<sup>-/-</sup>  
199 macrophages at all MOIs tested. The opposite was observed regarding *Cpt1b* mRNA  
200 levels, which were significantly increased in *Wnt6*<sup>-/-</sup> macrophages upon infection when  
201 compared to respective *Wnt6*<sup>+/+</sup> cells (Figure 3c). *Plin3* mRNA levels were up-regulated  
202 upon infection with Mtb in a dose-dependent manner, while *Plin3* mRNA levels remained  
203 largely unchanged in the absence of *Wnt6* (Figure S4b). Consistent with these findings,  
204 a strongly enhanced expression of *Acacb*, *Dgat2*, *Plin2* and *Plin3* was observed in  
205 WNT6-overexpressing (WNT6) NIH3T3 cells when compared to control (ctrl (LacZ) cells  
206 (Figure 3d), providing further evidence that WNT6 drives the expression of key  
207 metabolic factors associated with TAG synthesis (ACC2<sup>37-39</sup> and DGAT2<sup>35</sup>) and lipid  
208 droplet biogenesis (PLIN2<sup>15</sup> and PLIN3<sup>36</sup>).

209 To investigate whether WNT6 regulates ACC2 expression also in human cells, we  
210 analyzed WNT6 conditioned media (WNT6 CM) or control conditioned media (ctrl CM)  
211 treated human monocyte-derived macrophages (hMDMs) by qRT-PCR (Figure 3e).  
212 After 24h incubation, exogenous WNT6 induced the mRNA expression of ACC2  
213 (*ACACB*) and DGAT2 (*DGAT2*) by ~2fold, which is consistent with results from murine  
214 cells (compare to Figure 3b and 3c). Next, we investigated whether Mtb induces ACC2  
215 expression in hMDMs. qRT-PCR analysis of macrophages after 7 days of culture  
216 revealed that *ACACB* mRNA expression levels vary substantially between individual  
217 human donors (see uninfected (UI), Figure 3f). Upon Mtb infection, *ACACB* mRNA

218 levels were not altered at the 24h timepoint (data not shown), whereas at days 4 (data  
219 not shown) and 7 post infection (Figure 3f), a statistically significant increase of *ACACB*  
220 mRNA levels was observed albeit in a donor-dependent manner (fold increase between  
221 1.7-4.8). Together, these data show that WNT6 drives expression of key lipid metabolic  
222 enzymes, including ACC2, in both murine and human cells.

223

### 224 **WNT6-mediated changes in host lipid metabolism promote Mtb growth in** 225 **macrophages**

226 To assess whether WNT6-mediated changes in host lipid metabolism affect Mtb's ability  
227 to replicate intracellularly, we addressed Mtb growth in *Wnt6<sup>+/+</sup>* and *Wnt6<sup>-/-</sup>*  
228 macrophages. The number of Mtb bacteria 4h p.i. was comparable between both cell  
229 types independent of the dose of infection (Figure S4c). However, intracellular bacterial  
230 loads were significantly reduced in cells lacking *Wnt6* (Figure 3g and Figure S4d) at day  
231 3 p.i. (MOI 1, Figure 3g), showing approximately 50% reduced bacterial numbers in  
232 *Wnt6<sup>-/-</sup>* cells when compared to *Wnt6<sup>+/+</sup>* macrophages. Bacterial loads in *Wnt6<sup>+/+</sup>* cells  
233 further increased until day 7 post infection, while CFUs in *Wnt6<sup>-/-</sup>* cells remained at a  
234 rather low level (Figure 3g). This amounts to a CFU reduction of approximately 70% in  
235 the absence of *Wnt6*. At both time points analyzed, the quantification of nitrite in cell  
236 culture supernatants of *Wnt6*-competent and *Wnt6*-deficient macrophages revealed  
237 similar production of nitric oxide, a well-established tuberculostatic host factor (Figure  
238 S4e). Moreover, acidification rates of Mtb-containing compartments were similar  
239 between *Wnt6<sup>+/+</sup>* and *Wnt6<sup>-/-</sup>* macrophages as determined by fluorescence microscopy  
240 analyses of the intracellular localization of GFP-Mtb (green) and LysoTracker Dye (red)  
241 (Figure S4f). These findings suggest that WNT6 promotes Mtb growth without affecting

242 bacterial uptake, phagosome acidification, and nitric oxide production of infected  
243 macrophages.

244 In order to test whether a reduced availability of lipid substrates is the cause for the  
245 impaired growth of Mtb in *Wnt6*<sup>-/-</sup> cells, we supplemented macrophage cultures with  
246 various concentrations of oleate-BSA and determined CFU development on day 7 p.i.  
247 (Figure 3h). CFU levels in ctrl (BSA)-treated cultures were reduced by 42% in *Wnt6*<sup>-/-</sup>  
248 macrophages when compared to *Wnt6*<sup>+/+</sup> cells. Addition of 200 μM oleate-BSA to *Wnt6*<sup>-/-</sup>  
249 <sup>-/-</sup> macrophages led to significantly enhanced CFU numbers, which were similar to those  
250 in *Wnt6*<sup>+/+</sup> BMDMs. Higher oleate-BSA concentrations (400 μM) also led to a comparable  
251 bacterial burden in *Wnt6*<sup>+/+</sup> and *Wnt6*<sup>-/-</sup> cells. These data strongly suggest that WNT6-  
252 dependent changes in the cellular availability of lipids promote Mtb growth in  
253 macrophages.

254

### 255 **ACC2 activity promotes bacterial growth in macrophages**

256 To assess whether the identified WNT6 target enzyme ACC2 promotes Mtb growth in  
257 macrophages, we generated functional protein knockouts of both isoforms, ACC1 and  
258 2, by CRISPR/Cas9 mediated genome-editing in the human macrophage-like cell line  
259 BLaER1<sup>40,41</sup>. Mtb growth analyses revealed that deficiency of ACC2 but not of ACC1  
260 significantly reduces Mtb CFUs at day 3 p.i. (by ~58%) when compared to wild-type  
261 (WT) cells (Figure 4a). To substantiate this finding, we treated primary human  
262 macrophages (hMDMs) with three structurally different pharmacological ACC2  
263 inhibitors. All tested compounds reduced Mtb growth dose-dependently when compared  
264 to solvent control, albeit with varying efficacy (ranging from ~29-84% growth reduction,  
265 Figure 4b-e). Of note, the inhibitors tested did not exert toxic effects on human  
266 macrophages (Figure S5a and data not shown). The inhibitor concentrations used also

267 did not inhibit Mtb growth in liquid culture as indicated by comparable fluorescence  
268 signals between ctrl (solvent) or ACC2 inhibitor treated mCherry-expressing Mtb  
269 bacteria (see Figure S5b). Moreover, we did not observe a direct effect of ACC2  
270 inhibition on the immediate inflammatory response of hMDMs to Mtb as determined by  
271 measurement of TNF $\alpha$  release at day 1 (Figure S5c), 4 or 7 p.i. (data not shown). Taken  
272 together, our findings show that genetic and pharmacologic targeting of ACC2 activity  
273 restricts Mtb growth within human macrophages without reducing viability or the pro-  
274 inflammatory response of these cells. In order to test whether a reduced availability of  
275 lipid substrates is also the cause for the impaired growth in cells lacking active ACC2,  
276 we determined intracellular growth upon addition of fatty acids in the absence and  
277 presence of ACC2 inhibitors. This analysis revealed that both oleate as well as palmitate  
278 promote Mtb growth when added to hMDM cultures (Figure S5d). Exogenously added  
279 fatty acids – depending on the efficacy of the inhibitor and fatty acid used - can restore  
280 Mtb growth in ACC2 inhibitor treated cells (Figure 4f), suggesting a functional link  
281 between ACC2 dependent availability of cellular lipids and intracellular Mtb replication.  
282 Targeting ACC2 as a host-metabolic enzyme could complement pathogen-directed  
283 antibiotic treatments of TB. Thus, we tested the growth-inhibiting effect of ACC2  
284 inhibition on Mtb growth in primary human macrophages in combination with the first  
285 line anti-TB drug isoniazid (INH), which was applied at suboptimal concentration (0.03  
286  $\mu$ g/ml). In the same set of experiments already shown before (Figure 4b), ACC2 inhibitor  
287 1 or INH alone lead to a growth reduction of ~89% and ~79%, respectively, when  
288 compared to solvent control (Figure 4c). Treating cells with a combination of both  
289 resulted in a growth reduction of ~96% (Figure 4c), revealing a nearly additive effect of  
290 these drugs.

291

292 **ACC inhibition lowers TAG levels in infected macrophages and utilization of host**  
293 **cell fatty acids by Mtb**

294 In order to address whether ACC2 inhibition affects Mtb's ability to utilize host cell lipids  
295 from macrophages, we pulsed human macrophages with <sup>13</sup>C-labelled oleate prior to  
296 infection with Mtb. Mass spectrometric analyses demonstrated that the labeled oleate  
297 was effectively incorporated into TAG, CE and PC species of the host cell (Figure S6a  
298 and Supplementary Table I). A comparative analysis of Mtb infected cells at d7 p.i.  
299 showed that ACC2 inhibitor treatment – compared to solvent control – led to an overall  
300 reduction of TAG/PC ratios in macrophages (Figure 4g, left panel and Supplementary  
301 Table I), whereas CE/PC ratios - present in a drastically lower abundance - remained  
302 unchanged (Figure 4g, right panel). This shows that primarily TAGs are affected by  
303 inhibition of ACC2 enzyme activity. To trace the fate of <sup>13</sup>C-labelled oleic acid in Mtb, we  
304 monitored the incorporation of the labelled substrate into tuberculostearic acid (TSA,  
305 C19:0), a characteristic fatty acid of acid-fast bacteria of the order Actinomycetales<sup>42 43</sup>.  
306 In an independent study, we have established the detection and quantification of TSA  
307 in a highly abundant cell membrane phosphatidylinositol of Mtb (PI 16:0\_19:0 (TSA))  
308 (preprint: Heyckendorf et al. Biorxiv, 2020). In the current study, we found that <sup>13</sup>C-  
309 labelling in Mtb PI 16:0\_19:0 (TSA) (Figure S6b, lower panel) is reduced in samples  
310 from 3 out of 4 donors upon ACC2 inhibition (Figure 4h, left panel), which showed low  
311 TAG/PC ratios of 0.04, 0.11 and 0.04 (Figure 4g). This correlated with the magnitude of  
312 Mtb growth reduction (Figure 4h, right panel). Both, <sup>13</sup>C-labeling in Mtb and CFUs  
313 remained almost unchanged in samples from donor 4, which showed an up to 8fold  
314 increased TAG/PC ratio of 0.34 (Figure 4g), when compared to donor 1,2 and 3.  
315 Collectively, these data show that Mtb metabolizes host cell fatty acids, the  
316 metabolization of which is reduced when host ACC2 is inhibited. These findings

317 suggests that intracellular replication of Mtb requires sufficient access to TAG-derived  
318 lipid nutrients.

319

320 **ACC2 inhibition enhances mitochondrial activity and limits Mtb-induced necrotic**  
321 **cell death of macrophages**

322 ACC2 activity is known to impair mitochondrial fatty acid oxidation through CPT1  
323 inhibition<sup>37-39</sup>. Consistent with that, mitochondria were metabolically more active in ACC2  
324 KO BlaER1 macrophages (Figure S5e) as well as in ACC2-inhibitor treated cells as  
325 indicated by increased relative fluorescence signals of the membrane potential sensitive  
326 fluorochrome rhodamine 123<sup>44,45</sup> in Mtb-infected, ACC2 inhibitor-treated primary human  
327 macrophages when compared to control cells (day 3 p.i., Figure 4i). Based on these  
328 data and the previous observation that enhanced fatty acid oxidation upon ACC  
329 inhibition protects cells against lipotoxicity<sup>46</sup>, we monitored the viability of Mtb-infected  
330 macrophages in the absence or presence of ACC2 inhibitors. Indeed, we  
331 microscopically observed that ACC2-inhibitor treatment prolonged the survival of Mtb  
332 infected macrophages (Figure S5f). This prompted us to analyze necrotic cell death by  
333 measuring release of lactate dehydrogenase (LDH) as marker of cell membrane  
334 disruption<sup>47</sup>. Macrophages infected with Mtb showed a marked increase in LDH release  
335 during the course of infection in a time dependent manner (data not shown) with a ~43%  
336 maximum release at day 7 p.i. (Figure 4j). Strikingly, when treating infected cells with  
337 ACC2 inhibitor we observed a statistically significant reduction of LDH release in a dose-  
338 dependent manner when compared to solvent control (up to ~50% reduction of LDH  
339 release, Figure 4j). Taken together our findings suggest that WNT6-driven ACC2 activity  
340 is instrumental in promoting TAG accumulation and contributes to lipotoxicity-induced

341 necrotic cell death in macrophages, both of which contribute to Mtb replication and  
342 dissemination in the infected host<sup>48-50</sup>.

343

#### 344 **ACC2 inhibition improves anti-mycobacterial treatment *in vivo***

345 We then explored the presence of ACC2 *in vivo* and analyzed ACC2 expression in lung  
346 tissue sections of a TB patient. A strong ACC2 signal was found in the periphery of  
347 human necrotizing granulomas coinciding with the presence of CD68<sup>+</sup> cells (see boxes  
348 in Figure 5a and Figure S7a), suggesting that ACC2 plays a role during active TB in  
349 humans. Finally, we investigated the functional role of ACC2 *in vivo* employing an  
350 experimental murine model of TB infection. To our surprise, immunohistochemical  
351 stainings did not reveal a prominent ACC expression in the lungs of C57Bl/6 mice, even  
352 when infected with a high dose of Mtb (Figure 5c). In contrast, numerous ACC positive  
353 cells were easily detectable in low dose infected 129/Sv mice (Figure 5d), which are  
354 known to develop a TB susceptible phenotype resembling primary progressive TB  
355 disease in humans<sup>51</sup>.

356 To evaluate the efficacy of ACC2 inhibition *in vivo*, 129/Sv mice infected with Mtb for 28  
357 days were subjected to a short-term, low-dose treatment (25mg/kg BW) with ACC2  
358 inhibitor 3. This compound has been successfully tested in a preclinical mouse model  
359 of lung cancer<sup>52</sup>. Seven days after beginning of treatment with the ACC2 inhibitor, no  
360 substantial changes with regard to the inflammatory response and the bacterial burden  
361 was observed, when homogenates of lung, liver and spleen of ACC2 inhibitor treated  
362 mice were compared to those of vehicle control treated mice (Figure S7b and data not  
363 shown).

364 Our *in vitro* data reveal a strong Mtb growth reducing effect when INH and ACC2  
365 inhibitors were added to macrophage cultures simultaneously (Figure 4c). Since

366 targeting of host ACC2 would always be an adjunct to standard TB therapy, we  
367 combined ACC2 inhibitor with INH *in vivo*. A dose of 10 mg/kg bodyweight (BW) was  
368 chosen, as this is comparable to drug plasma concentrations observed in humans  
369 rapidly metabolizing INH (rapid acetylator phenotype)<sup>53,54</sup>. Two weeks after starting  
370 treatment, the concomitant administration of INH and the ACC2 inhibitor significantly  
371 reduced lung weights of infected mice when compared to INH treated animals by 25%  
372 (Figure 5e), which is indicative for a reduced presence of inflammatory cells in the lungs  
373 of these mice. In line with these results the combination of INH plus ACC2 inhibitor  
374 significantly reduced the production of the major pro-inflammatory cytokine TNF $\alpha$  as well  
375 as the neutrophil chemoattractants CXCL1 and CXCL5 (Figure 5f), when compared to  
376 mice treated with INH alone (day 42 p.i.). The expression levels of these chemokines  
377 correlate with bacterial loads and disease severity in susceptible Mtb-infected mice and  
378 have been associated with lung and granuloma necrosis<sup>55</sup>.

379 Moreover, mice treated with INH plus ACC2 inhibitor showed significantly reduced TAG  
380 abundance in the lungs, but no changes in the amounts of cholesterol esters (Figure  
381 5g), when compared to mice treated with INH alone, demonstrating that ACC2 inhibition  
382 affects TAG levels in the infected mouse lung. With regard to the impact on the bacterial  
383 burden, we observed that two weeks after starting treatment, INH and the ACC2 inhibitor  
384 together substantially reduced mean Mtb CFUs in lung (10fold), liver (2.7fold) and  
385 spleen (1.7fold) when compared to INH alone (Figure 5h). This effect reached statistical  
386 significance in the liver, but not in the lung ( $p=0.17$ ) and spleen ( $p=0.06$ ). Taken together,  
387 our data suggest that even a late and limited adjunct treatment with a pharmacological  
388 ACC2 inhibitor has an impact on the course of experimental Mtb infection *in vivo*.



389 **Discussion:**

390 Foamy macrophages are key players in TB as they provide a nutrient-rich reservoir for  
391 mycobacterial replication and contribute to tissue pathology<sup>21</sup>. However, the detailed  
392 mechanisms of how Mtb infection induces the development of these lipid-laden cells are  
393 still unclear. Our findings show that the WNT ligand WNT6 acts as a foamy macrophage-  
394 promoting factor in pulmonary TB by inducing acetyl-CoA carboxylase-2 (ACC2)  
395 (summarized in Figure 6). We found prominent WNT6 expression in cells showing  
396 characteristics of foamy macrophages in pulmonary granulomas from TB patients, as  
397 well as in mice, which develop human-like granuloma necrosis upon Mtb-infection<sup>26</sup>. In  
398 terms of function, our study reveals that the WNT6-ACC2 metabolic axis drives the  
399 accumulation of lipid droplets containing high levels of TAGs. We demonstrate that  
400 inhibiting ACC2 reduces TAG concentrations in macrophages *in vitro* as well as in the  
401 lungs of Mtb-infected mice *in vivo*. Moreover, our findings that the lack of *Wnt6* or ACC2  
402 reduce intracellular Mtb replication in macrophages strongly suggest that WNT6-ACC2  
403 induced changes in neutral lipid metabolism affect disease progression. Indeed,  
404 pharmacological ACC2 inhibitors, when combined with the first line drug isoniazid,  
405 improved anti-mycobacterial treatment in infected macrophages and mice. Together,  
406 our findings show that WNT6-ACC2 dependent metabolic changes leading to  
407 accumulation of TAGs in macrophages are exploited by the pathogen to facilitate its  
408 intracellular replication.

409 Independent studies have documented that pathogens including different mycobacterial  
410 species can trigger foam cell formation in a Toll-like receptor (TLR) mediated manner<sup>56-</sup>  
411 <sup>58,59,60</sup>. From a metabolic perspective, exposure of macrophages to already a single TLR  
412 ligand increases TAG storage<sup>12,61</sup>, enhances fatty acid uptake<sup>12,62</sup>, and diminishes  
413 mitochondrial fatty acid oxidation even in the presence of sufficient oxygen<sup>12,62</sup>. We have

414 previously shown that synthetic lipopeptides (Pam<sub>3</sub>CSK<sub>4</sub>), lipopolysaccharide (LPS) and  
415 various mycobacterial species including Mtb induce WNT6 in a TLR - NF-κB-dependent  
416 manner<sup>25</sup>. We now demonstrate that WNT6 drives the accumulation of TAG-rich lipid  
417 droplets by inducing the expression of several key lipid metabolic enzymes involved in  
418 neutral lipid synthesis and storage including ACC2. This key regulatory enzyme is well  
419 known to promote neutral lipid storage by blocking fatty acid oxidation<sup>37</sup> as it inhibits  
420 carnitine palmitoyltransferase 1 (CPT1)-dependent fatty acid uptake into mitochondria  
421 (summarized in Figure 6). Our results suggest that mycobacteria-induced and TLR-  
422 dependent differentiation of macrophages into a foamy phenotype is caused by WNT6-  
423 ACC2-induced metabolic changes in these cells. During chronic Mtb infection,  
424 mycobacterial TLR ligands lead to recurring activation of macrophages. Thus, it is likely  
425 that the TLR-WNT6-dependent perturbation of fatty acid metabolism can promote foam  
426 cell formation in pulmonary TB. Our prior findings suggest a physiological role of WNT6  
427 in dampening inflammation<sup>25</sup>. This explains why this mediator is not only induced during  
428 Mtb infection but is also upregulated in various chronic inflammatory disease settings  
429 such as inflammatory bowel disease and allergic asthma<sup>63,64</sup>.

430 Functional evidence for the importance of complex lipids as nutrient source for Mtb  
431 originates from studies showing that Mtb growth is inhibited when neutral lipid  
432 accumulation is diminished<sup>65,66</sup>. Mtb has evolved different mechanisms to manipulate  
433 host lipid metabolism. It disturbs cholesterol homeostasis by activating cells with keto-  
434 mycolic acid<sup>14,67</sup>, or impairs degradation of complex lipids via the anti-lipolytic GPR109A  
435 GPCR receptor<sup>65</sup>. Recently, it was shown that Mtb infection reduces fatty acid oxidation  
436 of macrophages by inducing miRNA-33, which inhibits lipid degradation and promotes  
437 Mtb growth<sup>66</sup>. Our current study reveals the metabolic consequences of WNT6  
438 expression in macrophages during pulmonary TB, revealing that WNT6 shifts lipid

439 metabolism away from oxidation of fatty acids towards intracellular retention of TAGs.  
440 Further, our observation that *Wnt6*- and *ACC2*-deficiency, as well as pharmacological  
441 inhibition of *ACC2* impairs *Mtb* replication in macrophages demonstrates that the *WNT6*-  
442 *ACC2* axis is exploited by the pathogen to facilitate its intracellular growth. Our data  
443 suggest that *WNT6* and *ACC2* activity control the intracellular availability of TAG-derived  
444 fatty acids utilized by *Mtb* in the macrophage. This is due to the fact, that (i) addition of  
445 fatty acids rescues *Mtb* growth in the absence of both functional *WNT6* and *ACC2* and  
446 (ii) inhibition of *ACC2* limits incorporation of host-derived oleic acid into *Mtb* specific cell  
447 membrane phospholipids. These findings are consistent with observations on *Mtb*'s  
448 ability to utilize oleate-induced host lipid droplets as carbon source<sup>20</sup>, and with data  
449 showing that proteins of *Mtb*, which are critically involved in fatty acid transport<sup>68,69</sup>, are  
450 required for full virulence of *Mtb in vivo*<sup>68</sup>. It has also been shown that – when  
451 macrophages face hypoxic conditions - host-derived fatty acids are converted by *Mtb*  
452 into TAGs that are stored in the bacteria<sup>70</sup>. Fatty acids from *Mtb*-TAGs may not be used  
453 for bacterial replication under these conditions. Ultimately, the microenvironment of *Mtb*  
454 and its host cell - in particular local oxygen levels - are decisive whether *Mtb* can actively  
455 replicate or acquires a dormancy-like phenotype.

456  
457 Lipid droplets are multifunctional organelles, which consist of proteins, enzymes and  
458 various types of neutral-lipids such as TAGs and CEs<sup>71,72</sup>. Recent findings show that  
459 also cytokines drive the accumulation of lipid droplets in the context of experimental TB  
460 infections<sup>73</sup>. If one relates the data by Knight et al.<sup>73</sup> to the results presented here, it  
461 appears that Interferon-gamma/HIF1- $\alpha$  signaling mediated lipid droplet accumulation is  
462 largely dependent on CE synthesis<sup>73</sup>. In contrast, we found that, in the absence of IFN-  
463  $\gamma$ , the *Mtb*-induced *WNT6*-*ACC2* signaling pathway drives the accumulation of TAG-rich  
464 lipid droplets in macrophages. It is possible that during *Mtb* infection, bacterial and host-

465 derived signals induce the formation of differentially composed subsets of lipid droplets,  
466 either being rich in TAG or CE. Thus, the amount of Mtb bacteria in relation to the extent  
467 of the host response may define whether TAG or CE rich lipid droplets are formed.  
468 Depending on their composition, lipid droplets could either contribute to host defense by  
469 acting as a platform for the synthesis of small lipid mediators<sup>73</sup> or rather promote  
470 bacterial replication by being exploited by Mtb as a carbon source. Our current study  
471 findings suggests a unique role for WNT6-ACC2 inducible TAG-rich lipid droplets in  
472 promoting Mtb replication during infection.

473  
474 In post-primary TB granulomas, necrosis is often associated with functional  
475 disintegration of the structured tissue reaction, which ultimately causes rupturing into  
476 the airways and dissemination of the mycobacteria into adjacent cells. The caseum, the  
477 liquefied content of necrotized granulomas, consists of host-derived lipids including  
478 TAGs<sup>15</sup> indicating that foamy macrophages undergo cell death during granuloma  
479 progression. Cell death is a multifaceted process induced by a variety of mediators<sup>74</sup>.  
480 Among these an intracellular accumulation of fatty acids has been shown to exert  
481 lipotoxic effects on cells<sup>75</sup>. Importantly, it has been shown that fatty acid induced cellular  
482 toxicity is diminished by inhibition of ACC<sup>46</sup>. Consistent with this observation, we  
483 demonstrate that Mtb-infected human macrophages show significantly reduced rates of  
484 necrotic cell death when ACC2 is inhibited by pharmacological inhibitors. Moreover, we  
485 observed that ACC2 inhibition during experimental TB infection of TB susceptible mice  
486 reduces the expression of granuloma disintegrating and necrosis-inducing factors, as  
487 the formation of chemokines (CXCL1 and 5) in inhibitor treated mice are significantly  
488 reduced. Consequently, WNT6-ACC2 signaling not only induces foam cell formation  
489 during pulmonary TB, but may also contribute to subsequent necrotic cell death of foamy  
490 macrophages and granuloma disintegration, thus favoring infection of neighboring cells

491 and the dissemination of bacteria within and from the host. In contrast to apoptosis<sup>74</sup>,  
492 necrotic cells have been suggested to serve as niches for Mtb replication<sup>49,50</sup> and  
493 represent a way for Mtb to disseminate extracellularly<sup>48</sup>.

494 While more than 10 drugs are currently available for TB treatment, treatment success  
495 of MDR and XDR Mtb strains is as low as 50% on a global level. This stimulated  
496 intensive research to develop new anti TB drugs, but also to explore alternative  
497 treatment concepts including host-directed therapies (HDT), which bear the promise of  
498 enhancing the efficacy of classical TB drugs and prevent resistance development<sup>2</sup>.  
499 Targeting the formation of TAG-laden “foamy” macrophages in the host may represent  
500 a promising HDT approach, as our findings suggest that these cells are exploited by  
501 intracellular Mtb to access lipids as predominant carbon source. A deregulated cellular  
502 lipid metabolism, as observed in the development of diseases such as hepatic  
503 steatosis<sup>39</sup> and non-small cell lung cancer<sup>52</sup>, can successfully be treated *in vivo* by the  
504 use of ACC2 inhibitors. Our findings demonstrate that pharmacological interference with  
505 WNT6-ACC2 signaling indirectly targets Mtb (i) by depriving Mtb from TAG-derived  
506 nutrients within the intracellular niche, and (ii) by limiting Mtb-induced necrotic cell death  
507 and mycobacterial dissemination. Our current *in vivo* data indicate that targeting ACC2  
508 could complement standard TB therapy as ACC2 inhibition in antibiotic-treated mice  
509 reduced the abundance of nutritive lipids and reduced the release of pro-necrotic  
510 mediators. Additional animal studies are necessary to further improve the concomitant  
511 therapy with ACC2 inhibitors when INH is administered. This includes the optimization  
512 of dosage, the start and the duration of therapy. In a long term perspective targeting of  
513 the host metabolic enzyme ACC2 may represent a promising approach for a host-  
514 directed adjunct therapy of antibiotic-based TB treatment.

515

516 Figure legends:

517 **Figure 1: WNT6 is expressed in foamy macrophages during pulmonary TB.**

518 **(a-c)** Analyses of formalin-fixed and paraffin-embedded lung tissue derived from a  
519 tuberculosis patient. Sections (1  $\mu\text{m}$ ) were incubated with an antibody specific for WNT6  
520 (a, b and c, left panel) or the macrophage/monocyte marker CD68<sup>76</sup> (c, middle panel).  
521 Antigens were either visualized with a horseradish peroxidase (HRP)-based detection  
522 system using 3-amino-9-ethylcarbazole (AEC) as chromogen (red) (a,b) or by use of  
523 specific fluorescence (Cy3 and Cy5)-labeled secondary antibodies (c). Black arrows in  
524 (a) indicate areas of WNT6-expressing cells and in (b) cells with a foamy morphology.  
525 N, necrosis. Scale bar, (a) 100  $\mu\text{m}$ ; (b) 50  $\mu\text{m}$ ; (c) 20  $\mu\text{m}$ . **(d)** Immunofluorescence  
526 analysis of lung tissue derived from Mtb-infected *IL-13* overexpressing mice (200 CFU;  
527 day 63 p.i.). Frozen sections (5  $\mu\text{m}$ ) were stained for WNT6 (red) by use of a specific  
528 primary antibody and a fluorescence(Cy3)-labeled secondary antibody. Neutral lipids  
529 (green) were stained by use of the neutral lipid dye BODIPY 493/503 (10  $\mu\text{g}/\text{ml}$ ), while  
530 nuclei (blue) were counterstained with DAPI. A representative picture of 3 independent  
531 observations is depicted.

532  
533 **Figure 2: WNT6 drives the accumulation of triacylglycerol (TAG)-rich lipid**  
534 **droplets.**

535 **(a)** Visualization of lipid droplets in WNT6-overexpressing or control (LacZ) NIH3T3 cells  
536 by fluorescence microscopy; blue, DNA staining (DAPI (1  $\mu\text{g}/\text{ml}$ )); green, neutral lipid  
537 staining (BODIPY 493/503 (5  $\mu\text{g}/\text{ml}$ )); representative staining from 2 independent  
538 experiments with similar results is shown. **(b)** Quantification of neutral lipids by flow  
539 cytometry (same cells as in (a); arithmetic mean fluorescence intensity (aMFI) of  
540 BODIPY signals); n=3. **(c)** Mass spectrometry-based quantification of TAGs (same cells  
541 as in (a)); n=3. **(d)** Visualization of lipid droplets in BMDMs from *Wnt6*<sup>+/+</sup> or *Wnt6*<sup>-/-</sup> mice  
542 incubated for 24 hours in the presence of oleate-BSA (200  $\mu\text{M}$ ) (shown is a  
543 representative staining from two independent experiments with similar results). **(e)** Mass  
544 spectrometry-based quantification of TAGs in BMDMs from *Wnt6*<sup>+/+</sup> or *Wnt6*<sup>-/-</sup> mice  
545 incubated for 24 h in the presence of BSA (ctrl) or Oleate-BSA (200 $\mu\text{M}$ ) (n=2). **(f)** Oxygen  
546 consumption rate (OCR, pMol per minute) of BMDMs preincubated for 24 h in the  
547 presence of BSA (ctrl) or Oleate-BSA (200  $\mu\text{M}$ ). Oligomycin (1  $\mu\text{M}$ ), FCCP (1.5  $\mu\text{M}$ ) and  
548 rotenone/antimycin (1  $\mu\text{M}$ ); n=2. **(g)** Visualization and **(h)** quantification of neutral lipids  
549 in Mtb-infected *Wnt6*<sup>+/+</sup> and *Wnt6*<sup>-/-</sup> peritoneal macrophages. After isolation, cells were  
550 infected with mCherry-expressing Mtb (MOI 0.1:1) for 24h, stained, and visualized by

551 fluorescence microscopy; red, Mtb; blue, DNA staining (DAPI); green, neutral lipids  
552 (BODIPY 493/503). For quantification of neutral lipids (h) over 200 cells per condition  
553 were analyzed in 5 independent experiments. Statistical analyses were carried out using  
554 One-Way ANOVA with a suitable post-hoc test for multiple comparison. \* $p \leq 0.05$ ,  
555 \*\* $p \leq 0.01$ , \*\*\* $p \leq 0.001$ . All data are depicted as mean +/- SEM.

557 **Figure 3: WNT6-mediated changes in host lipid metabolism promote Mtb growth**  
558 **in macrophages.**

559 **(a,b)** Microarray-based gene expression analysis of *Wnt6*<sup>+/+</sup> and *Wnt6*<sup>-/-</sup> BMDMs infected  
560 for 24 hours with Mtb H37Rv (MOI 3:1). Fold expression of statistically significantly  
561 regulated genes associated with fatty acid uptake and degradation **(a)** or lipid synthesis  
562 and storage **(b)** are depicted; n=3. **(c)** qRT-PCR based gene expression analysis of  
563 *Wnt6*<sup>+/+</sup> and *Wnt6*<sup>-/-</sup> BMDMs infected for 24 h with various doses (MOIs) of Mtb H37Rv;  
564 n=3. **(d)** qRT-PCR based gene expression analysis of WNT6-overexpressing (WNT6)  
565 or control (ctrl (LacZ)) NIH3T3 cells; n=3. **(e)** qRT-PCR based gene expression analysis  
566 of hMDMs treated with WNT6 conditioned medium (WNT6 CM) or control conditioned  
567 medium (ctrl) CM for 24 hours. Fold change relative to control (ctrl CM) is shown. For  
568 statistical comparison, raw data were used. Data from 3 independent experiments using  
569 cells from different donors are shown; n=3. **(f)** qRT-PCR based gene expression  
570 analysis of *ACACB* (*ACC2*) mRNA expression in Mtb-infected hMDMs at day 7 p.i.. Cells  
571 were infected with Mtb H37Rv (MOI) 1:1), washed (4 h p.i.) and incubated for 7 days;  
572 n=3. **(g)** CFU analysis of Mtb-infected (MOI 1:1) *Wnt6*<sup>+/+</sup> or *Wnt6*<sup>-/-</sup> BMDMs at day 0 (4  
573 h), 3 and 7 p.i. **(h)** CFU analysis of Mtb-infected (MOI 0.1:1) *Wnt6*<sup>+/+</sup> or *Wnt6*<sup>-/-</sup> BMDMs  
574 at day 7 p.i. after incubation of cells various concentrations of oleic acid (oleate-BSA).  
575 Bacterial growth was related to the number of macrophages (normalized CFU) at the  
576 individual timepoint/condition (given as CFU per 100.000 cells). Shown is the mean +/-  
577 SEM of a total of 3 **(g)** or 4 **(h)** independent experiments. Statistical analyses were  
578 carried out using One-Way ANOVA with a suitable post-hoc test for multiple comparison  
579 except microarray-based gene expression analysis **(c,d)**, which was conducted as  
580 described in *Material and Methods*. \* $p \leq 0.05$ , \*\* $p \leq 0.01$ , \*\*\* $p \leq 0.001$ . All data are depicted  
581 as mean +/- SEM.

582  
583  
584  
585

586 **Figure 4: ACC2 activity promotes bacterial growth in macrophages by promoting**  
587 **TAG accumulation and necrotic cell death**

588 **(a)** CFU analysis of Mtb-infected (MOI 0.5:1) wild-type (WT), ACC1 KO and ACC2 KO  
589 human macrophage-like cells (BLaER1 macrophages) at day 3 p.i.. n=3. **(b,d,e)** CFU  
590 analysis of Mtb-infected (MOI 1:1) hMDMs treated with pharmacological ACC2 inhibitors  
591 at day 7 p.i.. Uptake was determined 4h p.i.. After washing, cells were incubated in the  
592 absence (solvent ctrl, DMSO) or presence of different ACC2 inhibitors with the  
593 concentrations indicated; n=3. **(c)** In the same set of experiments shown in (b),  
594 additionally to the treatment with ACC2 inhibitor 1 alone (300nM), cells were also treated  
595 with isoniazid (INH (0.03 µg/ml)) or as a combination of ACC2 inhibitor plus INH. Shown  
596 is the relative reduction of CFU (%). **(f)** CFU analysis of Mtb-infected (MOI 0.5:1) hMDMs  
597 treated with ACC2 inhibitors in the presence of exogenous fatty acids at day 7 p.i..  
598 Uptake was determined 4h p.i.. After washing, cells were incubated with oleate-BSA or  
599 palmitate-BSA (both 400µM) in the absence or presence of ACC2 inhibitors 2 (blue  
600 triangles, 300 nM) or ACC2 inhibitor 3 (green triangles, 400 nM); n=4. **(g,h)** hMDMs  
601 were pulsed with isotopically labelled <sup>13</sup>C-Oleate-BSA prior to infection with Mtb (MOI  
602 1:1) and subsequently incubated in the absence (solvent, ctrl) and presence of ACC2  
603 inhibitor 3 (400 nM) for 7 days. Mass spectrometry-based analyses show (g) ratios of  
604 TAG (left panel) and CE (right panel) normalized to PC and (h, left panel) the change  
605 (%) in isotope labeling (<sup>13</sup>C<sub>18</sub>) in the Mtb-specific membrane lipid PI 16:0\_19:0  
606 tuberculostearic acid (TSA) from the same sample. In parallel, cells were subjected to  
607 CFU analysis, revealing the % of CFU reduction (h, right panel) from each individual  
608 experiment (donor); n=4. **(i)** Flow cytometry-based quantification of -Rhodamine 123  
609 signals (relative to MitoTracker Deep Red signals (both aMFI) x100) in Mtb-infected  
610 (MOI 0.1:1) and ACC2 inhibitor 3 (400nM) treated hMDMs at day 3 p.i.; n=4. **(j)**  
611 Quantification of Lactate Dehydrogenase Release (LDH) from hMDM cultures at day 7  
612 p.i.; n=5. Cells were equally infected as described for (b). UI, uninfected; TAG,  
613 Triacylglycerols; PC, Phosphatidylcholines; CE, Cholesterol ester. Statistical analyses  
614 were carried out using One-Way ANOVA with a suitable post-hoc test for multiple  
615 comparison; \*p≤0.05, \*\*p≤0.01, \*\*\*p≤0.001. All data are depicted as mean +/- SEM.

616

617 **Figure 5: ACC2 expression affects disease development in pulmonary TB.**

618 **(a,b)** Immunohistochemical analyses of formalin-fixed and paraffin-embedded lung  
619 tissue derived from a tuberculosis patient. Consecutive sections (1µm) were incubated  
620 with antibodies specific for ACC2 (a) or the macrophage/monocyte marker CD68 (b).



621 Antigens were visualized with a Horseradish peroxidase (HRP)-based detection system  
622 using AEC as chromogen (red). Scale bar, 100  $\mu\text{m}$  **(c,d)** Immunohistochemical analyses  
623 of formalin-fixed and paraffin-embedded lung tissue of Mtb-infected C57Bl/6 (~1000  
624 CFU, d42 p.i.) or 129/Sv mice (~200 CFU, d28 p.i.). Sections (2  $\mu\text{m}$ ) were incubated  
625 with antibodies specific for ACC 1/2 and antigens visualized with a Horseradish  
626 peroxidase (HRP)-based detection system using AEC as chromogen (red). **(e-h)** *In vivo*  
627 efficacy of ACC2 inhibitor treatment when combined with the first-line anti-TB drug INH.  
628 After 28 days of infection with Mtb H37Rv (~200CFU), 129/Sv mice were either left  
629 untreated (pretreatment, d28 p.i., n=4, white bars) or were treated for 14 days with INH  
630 alone (10 mg/ per kg bodyweight (BW), n=8, grey bars) or with ACC2 inhibitor 3 (ND-  
631 646, 25 mg/kg BW) plus INH (n=10, red bars). Lung weights (e), lung cytokine and  
632 chemokine levels (f), TAG and CE abundance in the lung (g), as well as mycobacterial  
633 loads in lung, liver and spleen were determined. Statistical analyses were carried out  
634 using an one-tailed, unpaired Student's t-test; \* $p \leq 0.05$ , \*\* $p \leq 0.01$ , \*\*\* $p \leq 0.001$ ; n.s.= not  
635 significant. Data are depicted as Min-Max bar with line at mean.

636  
637 **Figure 6: WNT6-ACC2-induced accumulation of triacylglycerol rich lipid droplets**  
638 **is exploited by *M. tuberculosis*.**  
639 Homeostatic- or activation (TLR2/4)-dependent WNT6-signaling via Frizzled receptors  
640 induces the expression of various key lipid metabolic genes including acyl-  
641 CoA:diacylglycerol acyltransferase (DGAT2) and Acetyl-CoA Carboxylase-2 (ACC2).  
642 ACC2 is known to generate Malonyl-CoA, which inhibits carnitine palmitoyltransferase 1  
643 (CPT1)-dependent import of fatty acids into mitochondria thereby reducing cellular fatty  
644 acid oxidation. Intracellular fatty acids are converted by different enzymes including  
645 DGAT2 into triacylglycerols(TAG), which are sequestered into lipid droplets. *M.*  
646 *tuberculosis* gains access to host derived fatty acids, e.g. via the interaction of bacteria  
647 containing phagosomes with TAG-rich lipid droplets. Intracellular accumulation of fatty  
648 acids also induces necrotic cell death (lipotoxicity) thereby promoting Mtb dissemination  
649 and release of lipid droplets from the dying host cell.

650

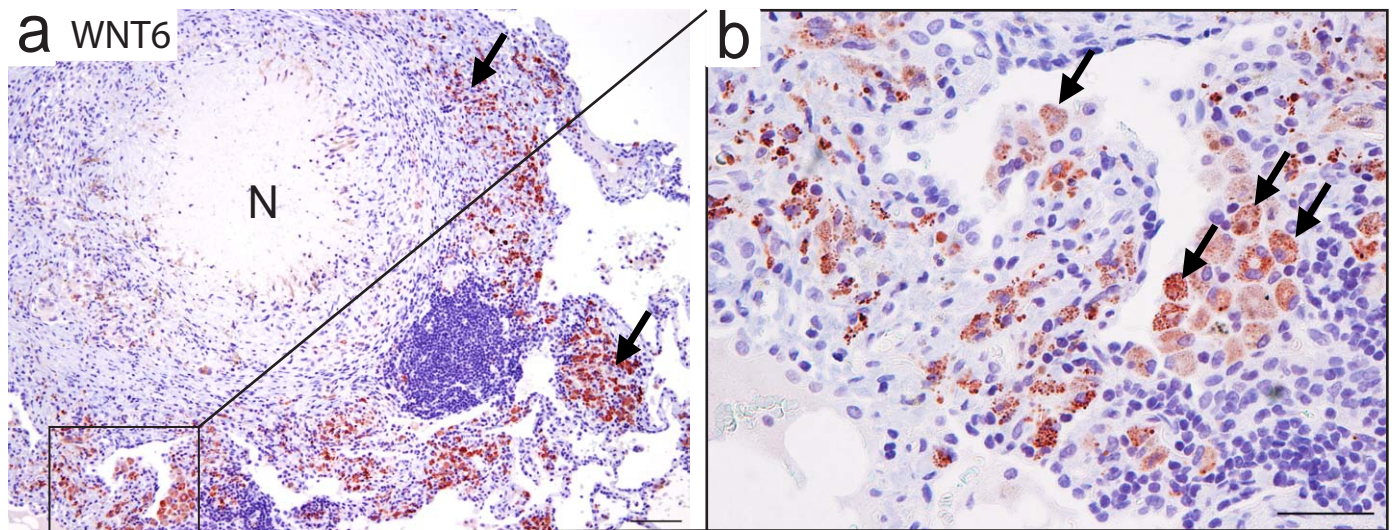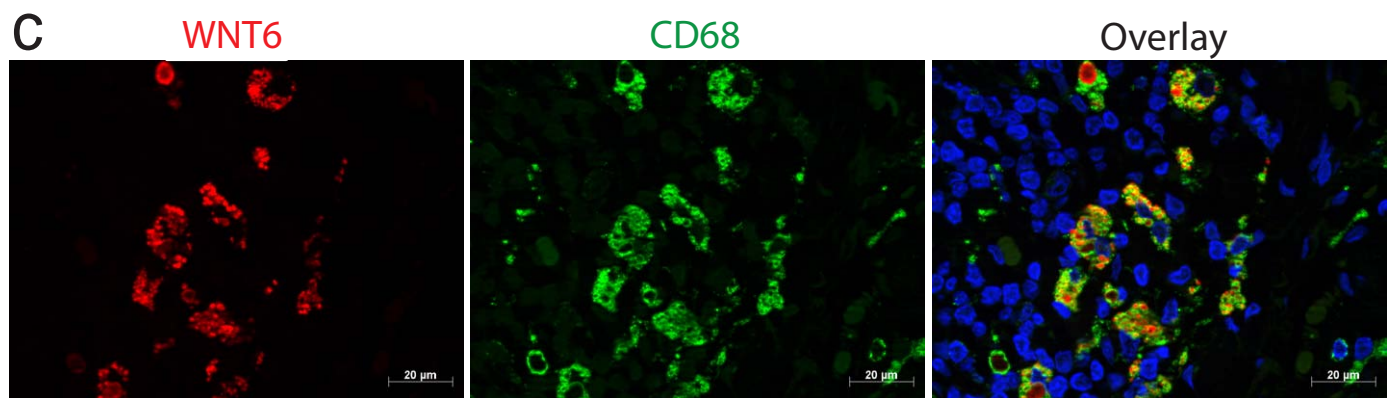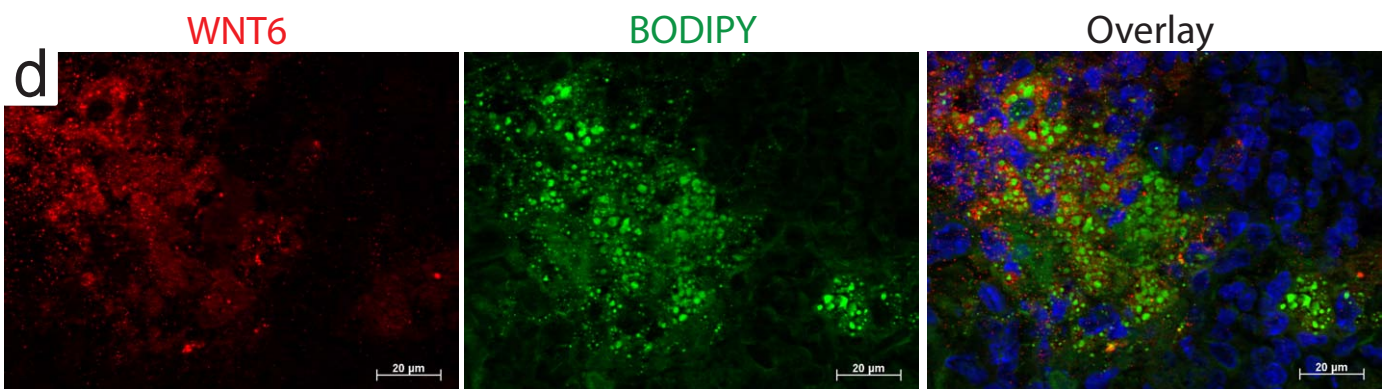

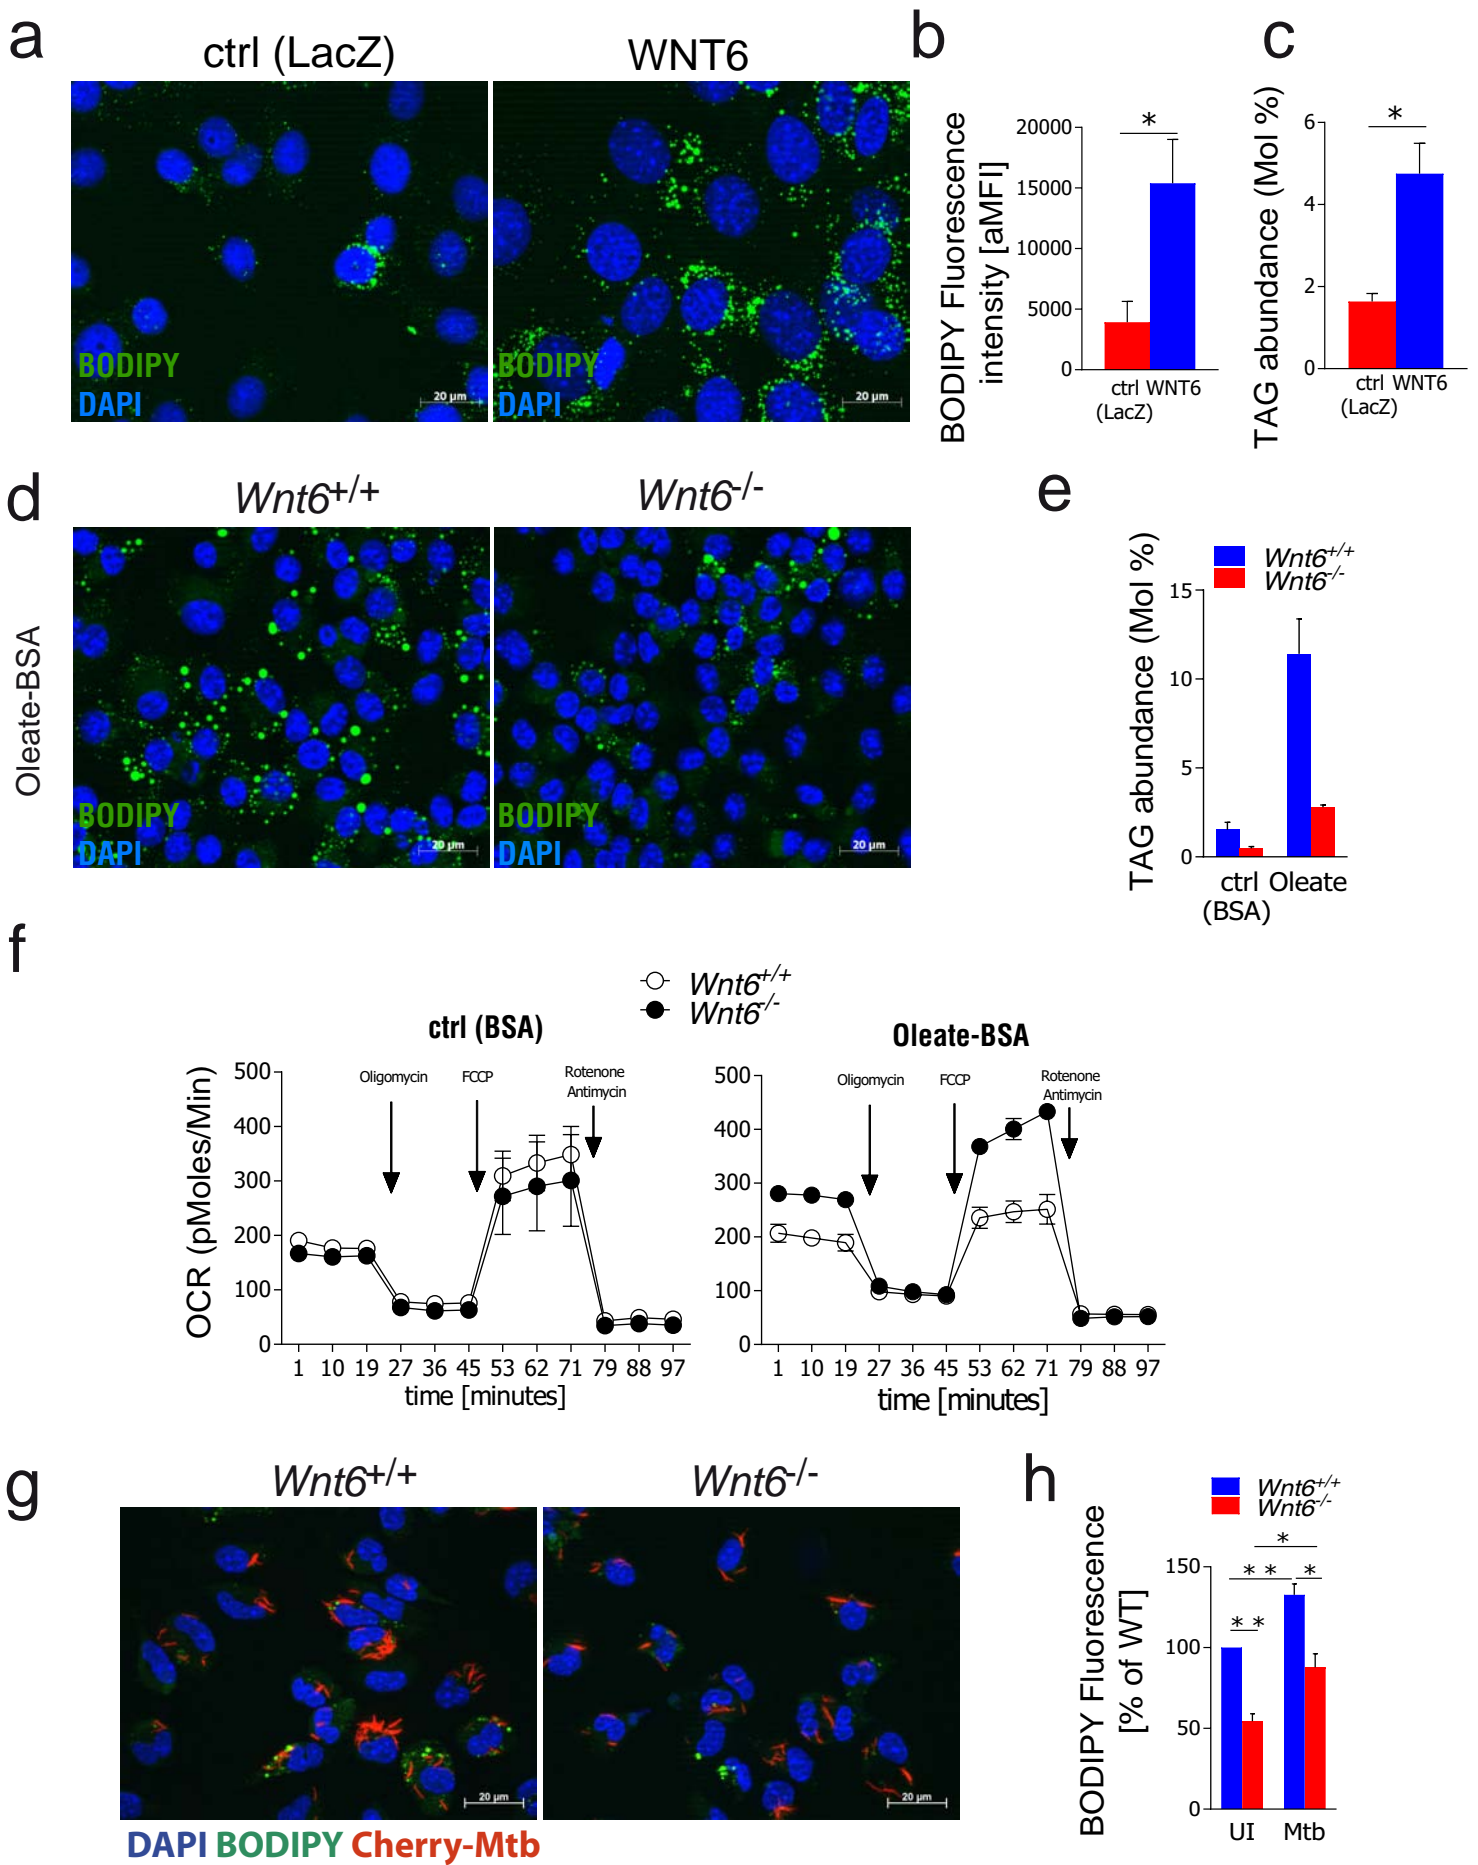

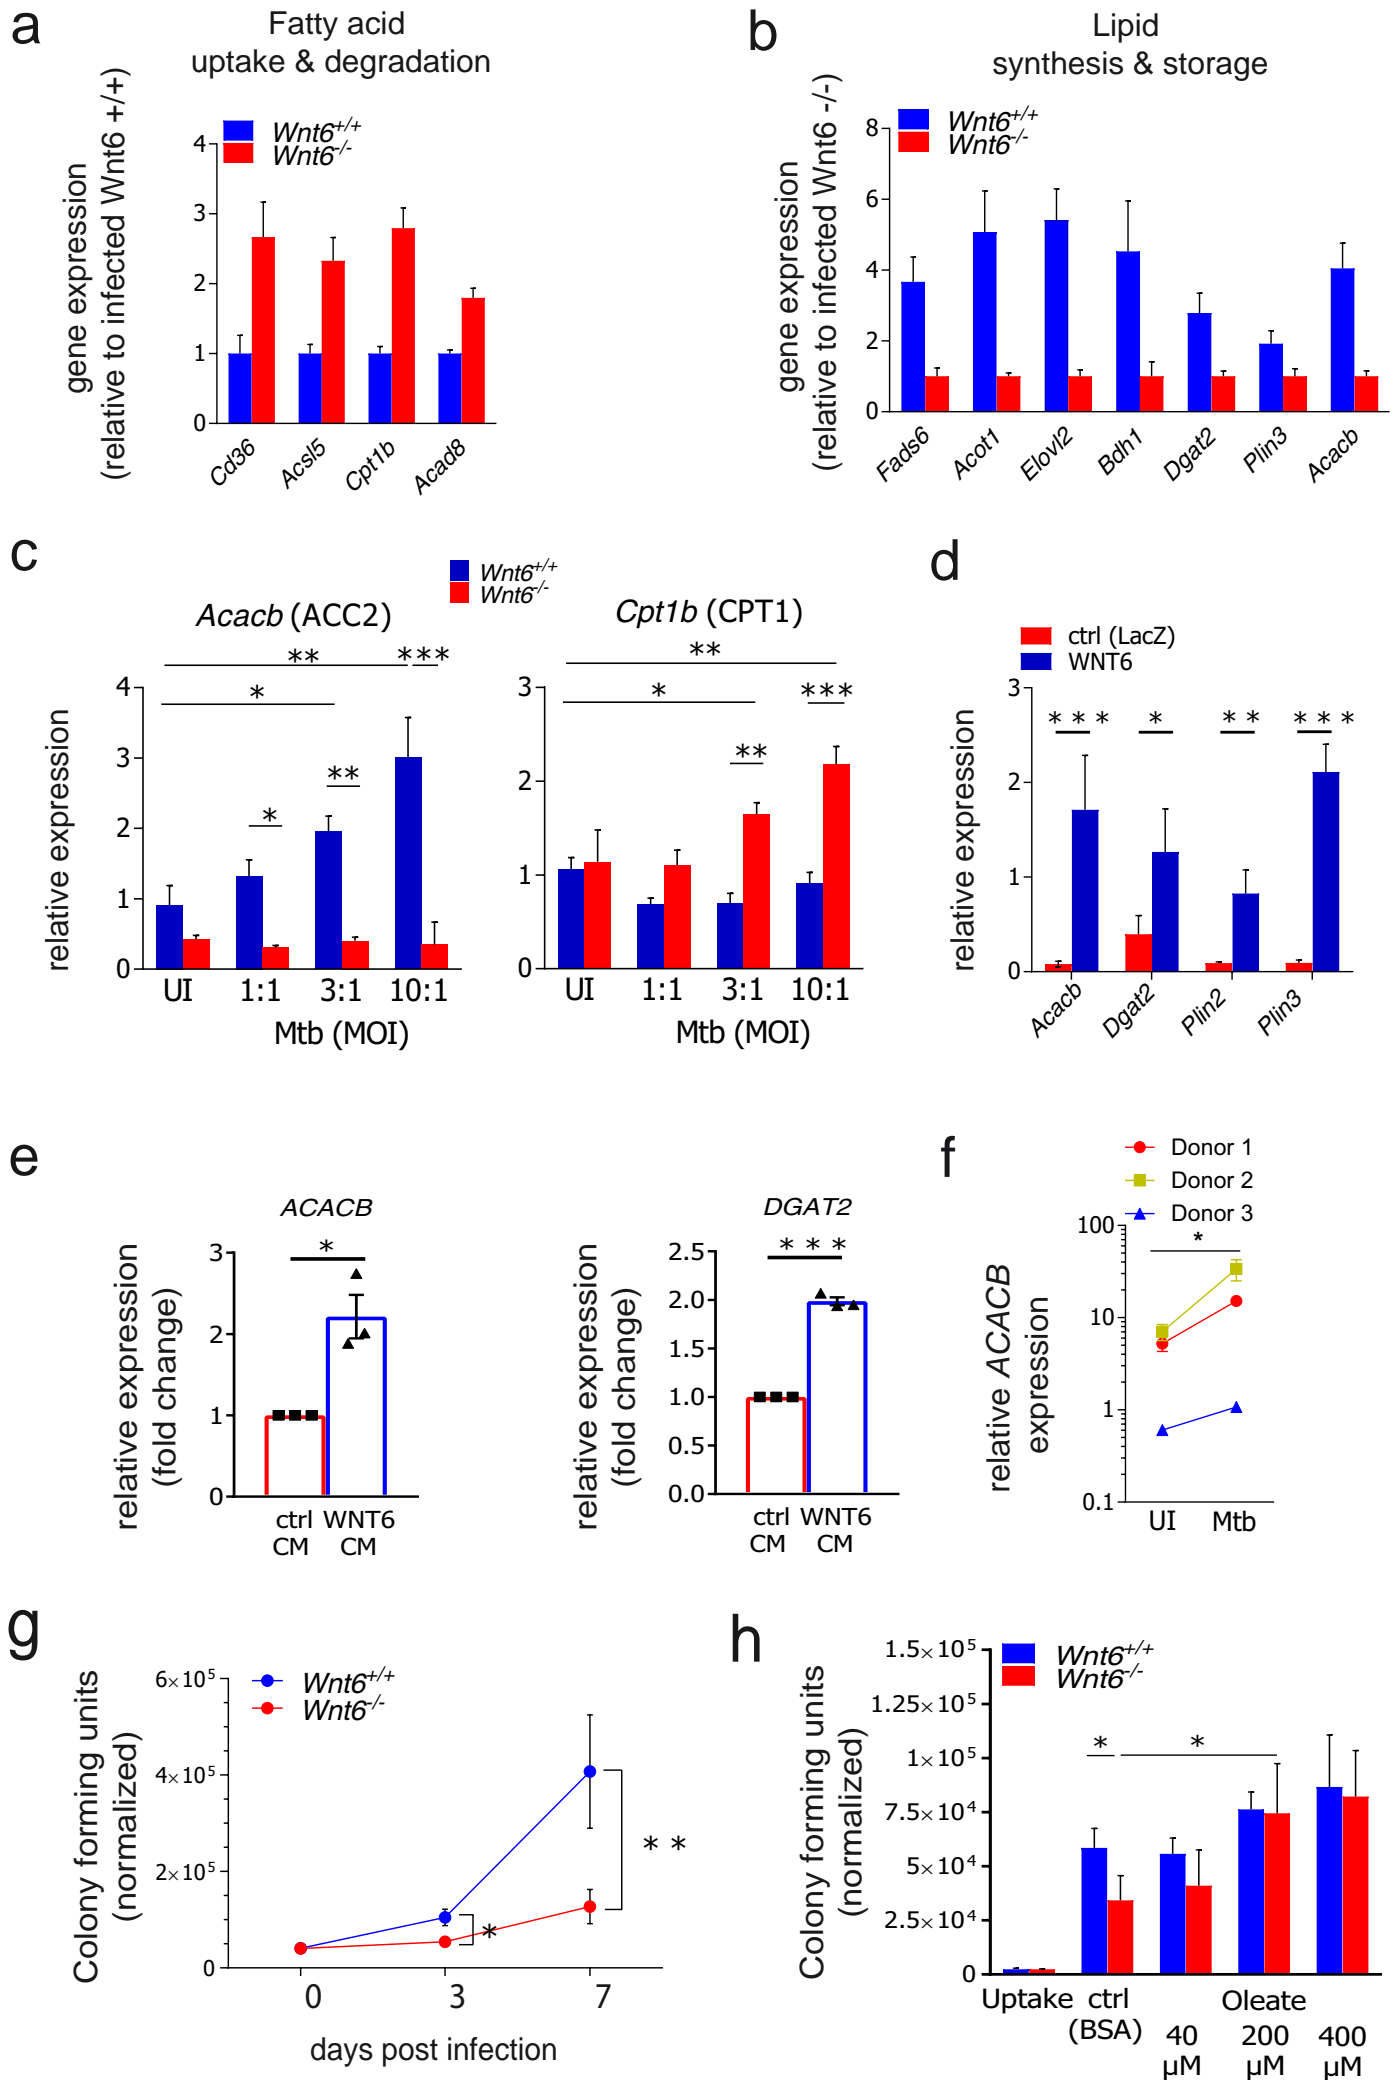

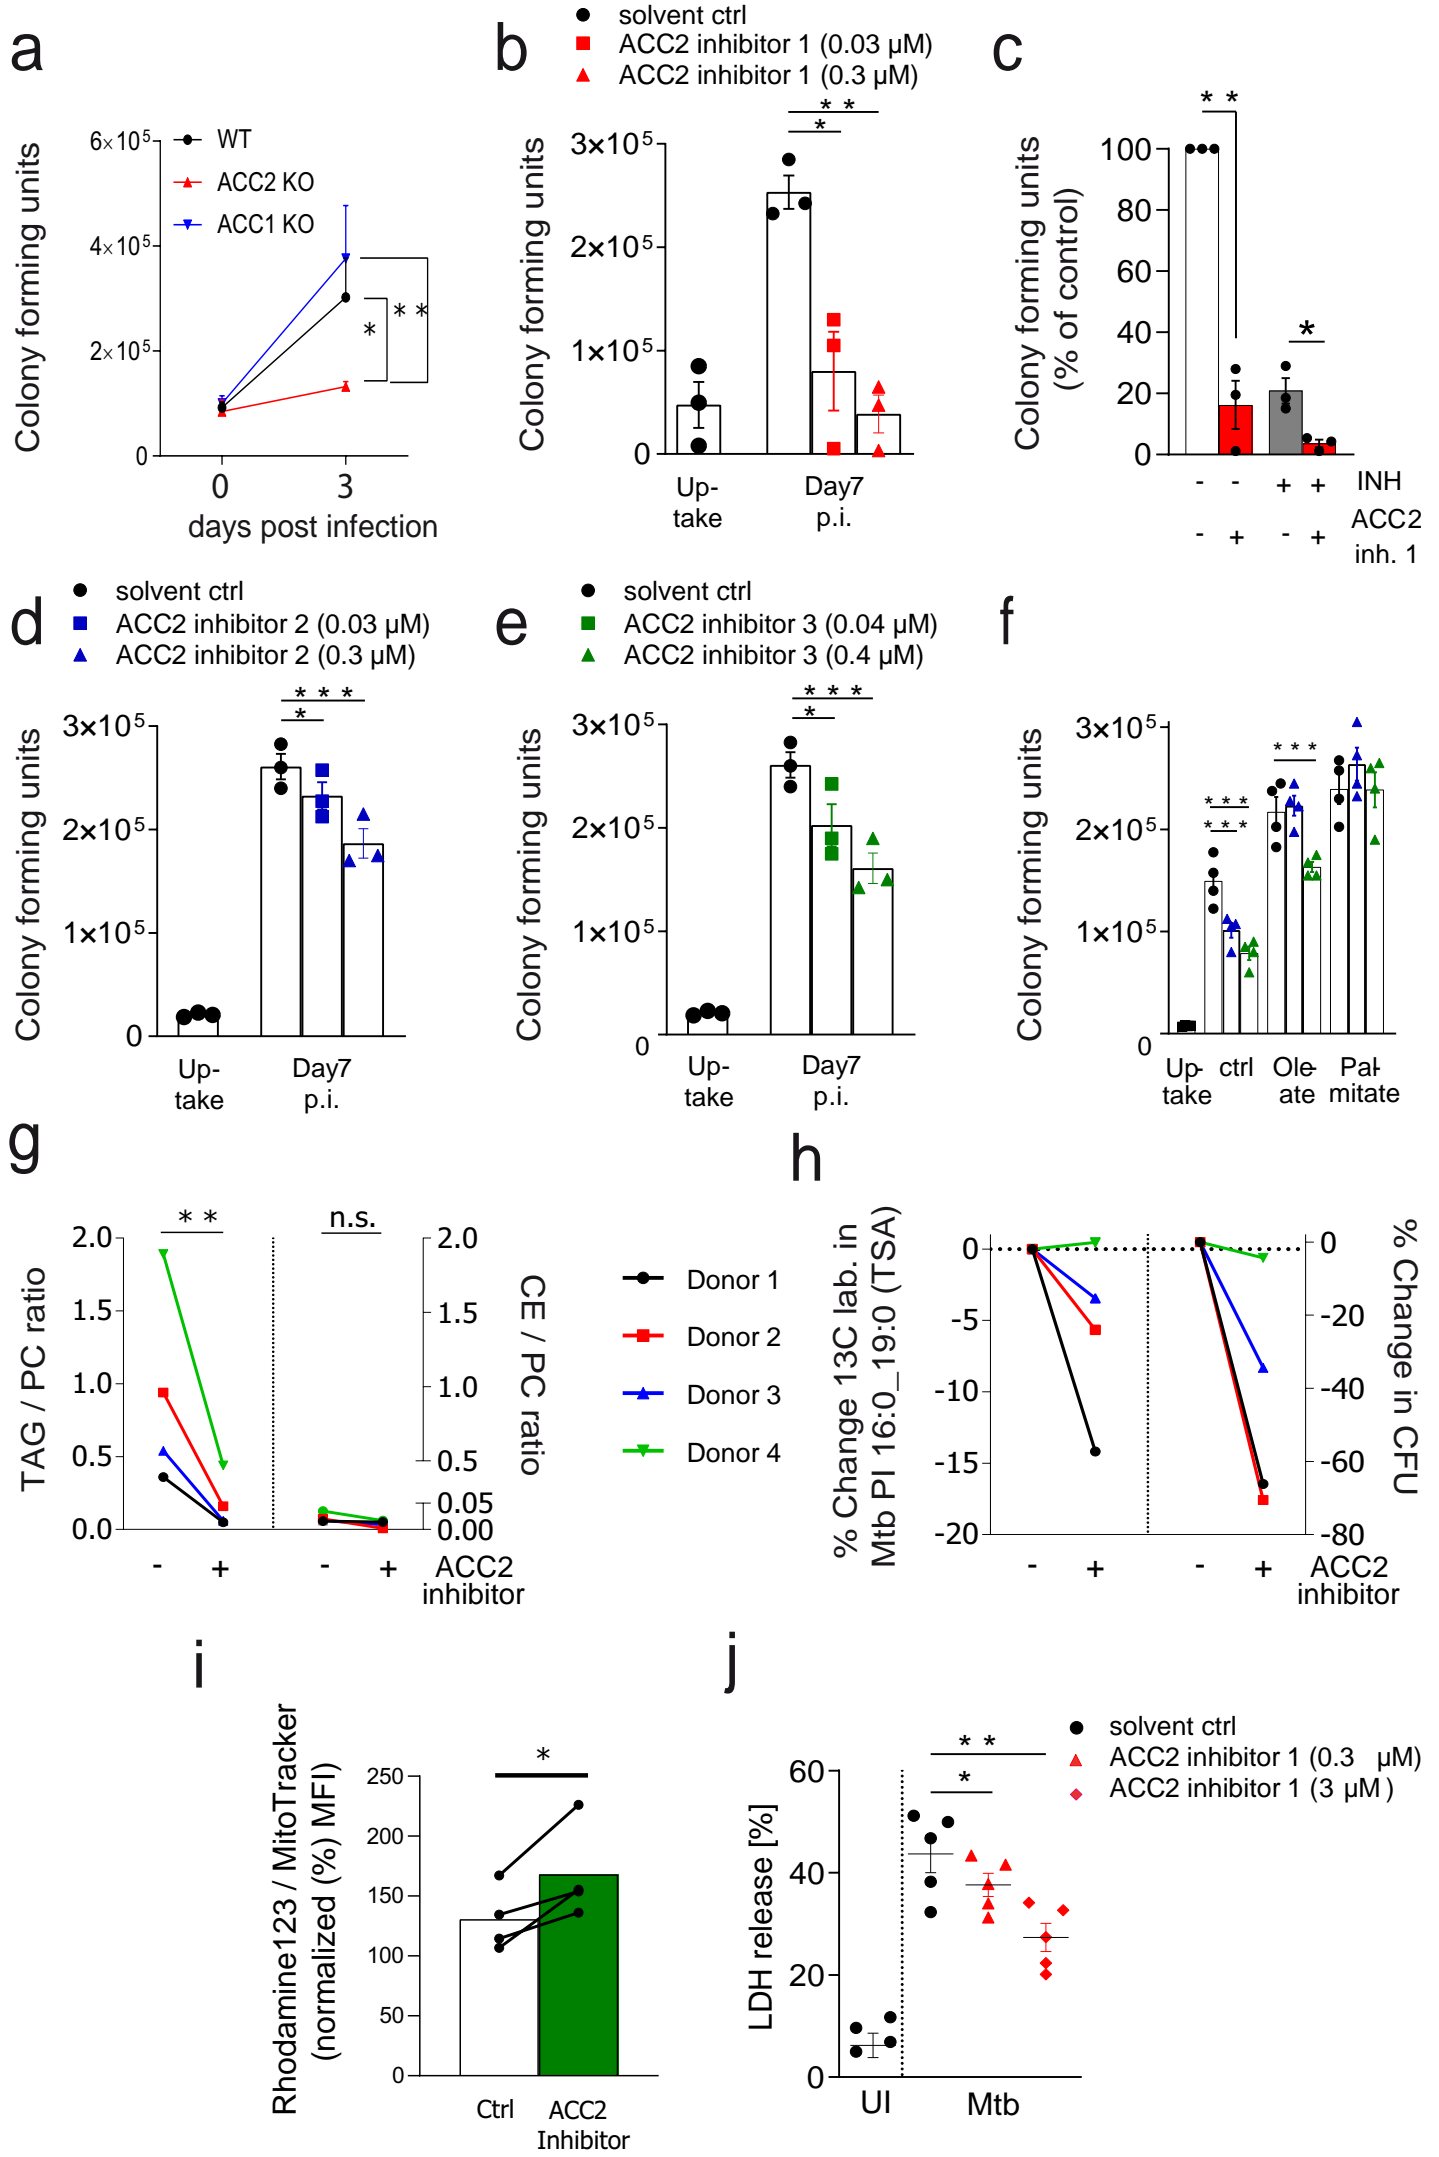

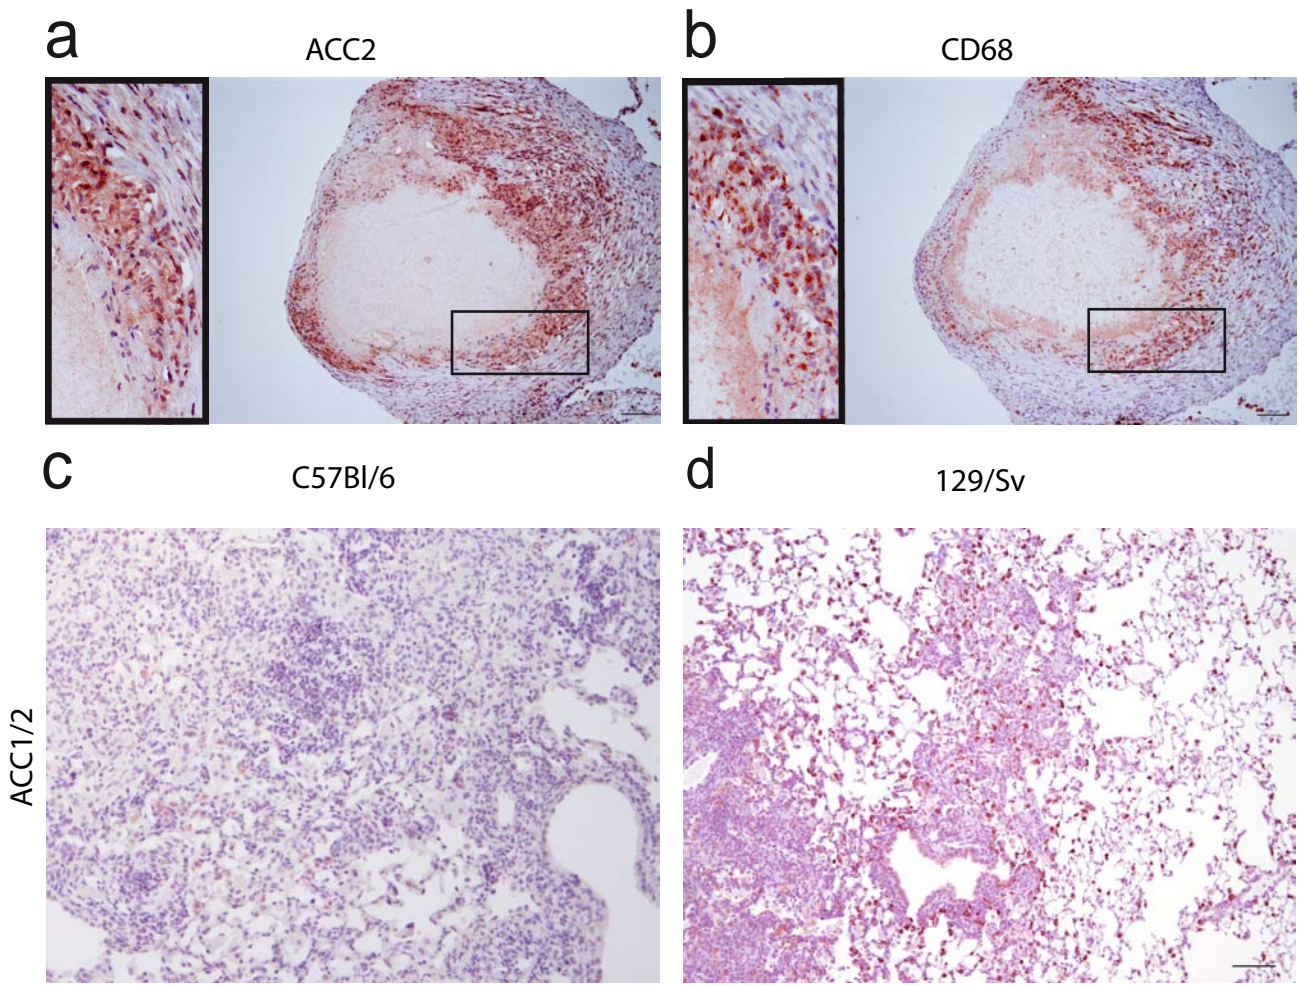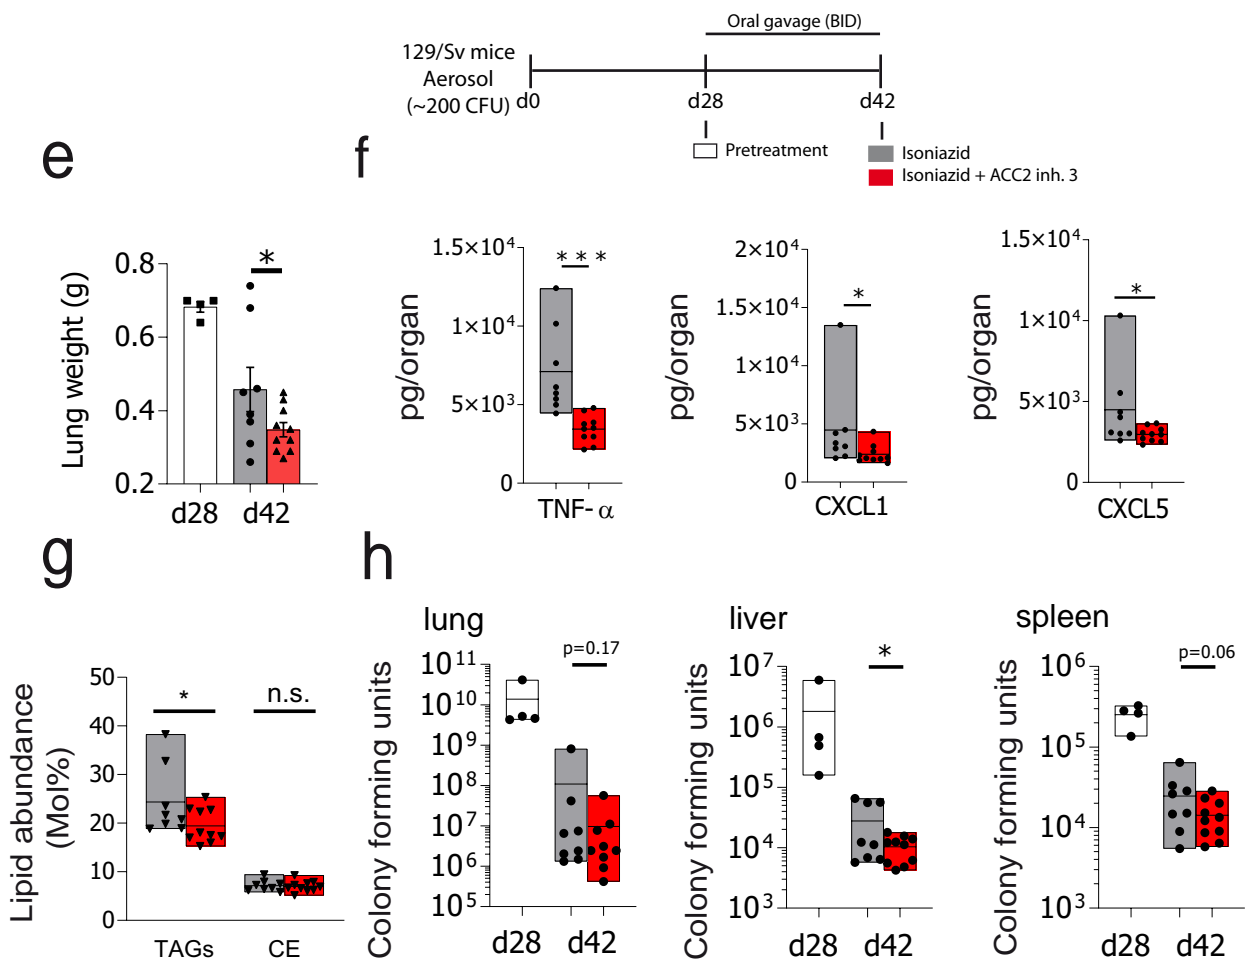

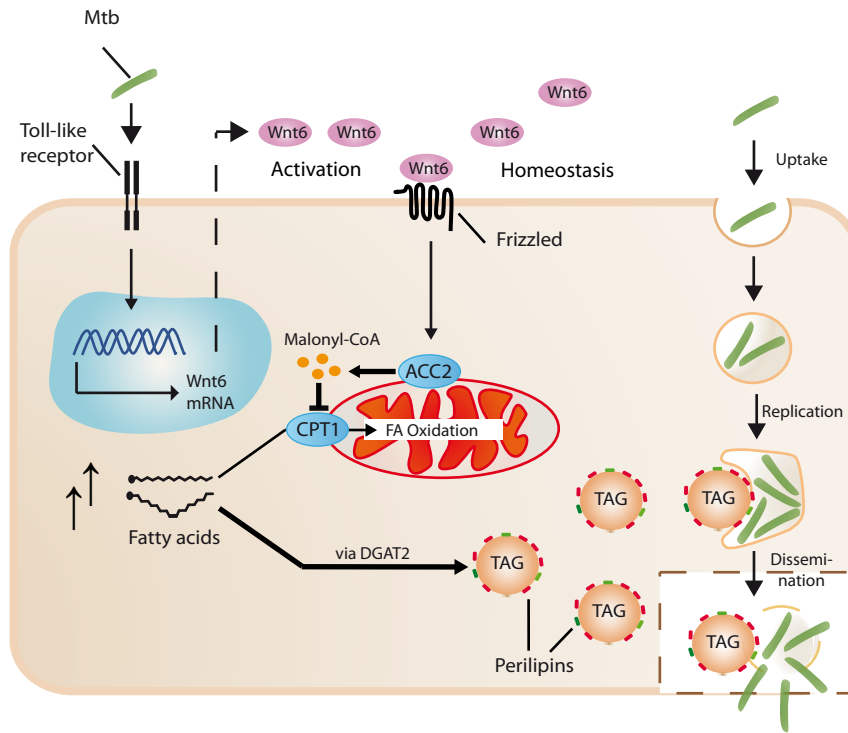

651 Supplementary figure legends:

652 **Figure S1: WNT6 expression in lungs of TB patients.** Immunohistochemical analyses  
653 of formalin-fixed and paraffin-embedded lung tissue from three tuberculosis patients.  
654 Sections (1-2  $\mu\text{m}$ ) were incubated with antibodies specific for WNT6 (**a, d**), the  
655 macrophage/monocyte marker CD68 (**b**), the lipid droplet scaffolding protein Perilipin 2  
656 (ADFP) (**e**) or without primary antibodies as a control (**c,f**). Antigens were visualized with  
657 a horseradish-peroxidase (HRP)-based detection system using AEC as chromogen.  
658 Scale bar: 50  $\mu\text{m}$  and 100  $\mu\text{m}$  (c (ctrl of patient 3)).

659  
660 **Figure S2: WNT6 and neutral lipids in Mtb-infected *IL-13* overexpressing mice.**  
661 Frozen lung tissue sections (5 $\mu\text{m}$ ) derived from Mtb-infected *IL-13* overexpressing mice  
662 were stained for neutral lipids with Oil-Red O (**a, b**; d104 p.i.) or BODIPY 493/503 (**c**;d63  
663 p.i., 10  $\mu\text{g}/\text{ml}$ , green). The section in (c) was stained with BODIPY in the absence of  
664 primary antibody (sec. AB ctrl.). Nuclei were stained with DAPI (blue); N, Necrosis.

665  
666 **Figure S3: WNT6 does not affect synthesis of phosphatidylcholines. (a)**  
667 Quantification of phosphatidylcholine species in WNT6-overexpressing or control (LacZ)  
668 NIH3T3 cells by mass spectrometry. The sum of all measured phosphatidylcholine  
669 species (expressed in Mol %) from the same set of experiments as depicted in Figure  
670 2c is shown; n=3. (**b**) Phosphatidylcholine 36:2 levels in *Wnt6*<sup>+/+</sup> or *Wnt6*<sup>-/-</sup> BMDMs  
671 incubated for 24 hours in the absence (BSA, ctrl) or presence of fatty acids (oleate-BSA,  
672 200  $\mu\text{M}$ ) as determined by mass spectrometry. Data are from the same set of  
673 experiments as depicted in Figure 2e; n=2. All data are depicted as mean  $\pm$  SEM.

674  
675 **Figure S4: Effect of *Wnt6*-deficiency on Mtb-induced gene expression, Mtb uptake**  
676 **and growth, nitrite formation and acidification of Mtb-containing compartments.**  
677 (**a**) Top 10 enriched gene sets derived from a gene set enrichment analysis of all  
678 differentially regulated genes between Mtb-infected *Wnt6*<sup>+/+</sup> and *Wnt6*<sup>-/-</sup> BMDMs. Cells  
679 were infected for 24 h with Mtb H37Rv (MOI 3:1), total RNA was extracted, and  
680 subjected to microarray-based gene expression analyses. Further analysis was  
681 conducted as described in *Material and Methods*; n=3. (**b**) qRT-PCR based gene  
682 expression analysis of *Wnt6*<sup>+/+</sup> and *Wnt6*<sup>-/-</sup> BMDMs infected for 24h with various doses  
683 (MOIs) of Mtb H37Rv; n=3. (**c,d**) CFU analysis of *Wnt6*<sup>+/+</sup> and *Wnt6*<sup>-/-</sup> BMDMs after  
684 infection with Mtb H37Rv. Cells were infected, washed (4 hours p.i.) and incubated for



685 the time indicated. Bacterial growth was related to the number of macrophages  
686 (normalized CFU) at the individual timepoint (given as CFU per 100.000 cells); n=3. **(e)**  
687 Quantification of nitrite (NO<sub>2</sub><sup>-</sup>) in culture supernatants of *Wnt6*<sup>+/+</sup> and *Wnt6*<sup>-/-</sup> BMDMs after  
688 infection with Mtb H37Rv (as described in (d)) for 3 (left panel) or 7 days (right panel) by  
689 Griess reaction; n=2. **(f)** Visualization (left panel) and quantification (right panel) of  
690 acidified Mtb-containing compartments. *Wnt6*<sup>+/+</sup> and *Wnt6*<sup>-/-</sup> BMDMs were infected with  
691 heat-inactivated (85°C, 5 minutes) or viable GFP-expressing Mtb H37Rv (green) for 4  
692 hours, were simultaneously (2 h) treated with LysoTracker dye (400 nM; red), washed,  
693 fixed, stained with DAPI (1 µg/ml; blue) and visualized by fluorescence microscopy.  
694 Evaluation of LysoTracker positive phagosomes was conducted in a blinded fashion of  
695 over 200 compartments per condition in a total of 3 independent experiments. Statistical  
696 analyses were carried out using One-Way ANOVA with a suitable post-hoc test for  
697 multiple comparison (d); \*p≤0.05, \*\*p≤0.01, \*\*\*p≤0.001. All data are depicted as mean  
698 +/- SEM.

699  
700 **Figure S5: Pharmacological inhibition of ACC2 does not decrease replication of**  
701 **Mtb in liquid culture, neither does it decrease viability or affect TNFα release of**  
702 **Mtb-infected primary human macrophages.**

703 **(a)** Analysis of human macrophage viability in the presence of ACC2 inhibitor 1 as  
704 determined by real-time impedance measurements (expressed as cell index). hMDMs  
705 were incubated in the presence of solvent (DMSO, ctrl), ACC2 inhibitor 1 or  
706 Staurosporine (1 µg/ml) for the indicated time on a xCELLigence System; Depicted is  
707 representative data from 2 independent experiments with similar results. **(b)** Mtb growth  
708 in the absence (solvent) and presence of various ACC2 inhibitors or the TB drug  
709 rifampicin as determined by measuring fluorescence of GFP-expressing Mtb in liquid  
710 culture. Bacteria were cultured in 7H9 medium supplemented with 10% OADC and  
711 growth was measured as relative light units at 528 nm after excitation at 485 nm in a  
712 fluorescence microplate reader at the indicated time point; n=2 (left panel), n=3 (right  
713 panel). **(c)** TNFα release of hMDMs infected for 24 hours with Mtb H37Rv and  
714 simultaneously incubated with solvent (DMSO, ctrl) or the indicated concentrations of  
715 ACC2 inhibitor 1. Mean +/- SEM from 3 independent experiments/donors is shown. **(d)**  
716 Effect of addition of fatty acids on Mtb CFU in primary human macrophages. After  
717 infection with Mtb (MOI 0.5:1), cells were washed and incubated in the absence (BSA)  
718 or presence of different concentrations of oleate- and palmitate-BSA. Data are derived

719 from the same set of experiments shown in Figure 4f; n=4. **(e)** Flow cytometry-based  
720 quantification of Rhodamine 123 signals (relative to MitoTracker Deep Red signals (both  
721 aMFI) x100) in Mtb-infected wild-type (WT) and ACC2 KO human macrophage-like cells  
722 (BLaER1 macrophages) (MOI 0,1:1) normalized to uninfected WT cells at day 3 p.i..**(f)**  
723 Enhanced viability of hMDMs during infection with Mtb H37Rv when treated with ACC2  
724 inhibitor (lower panel) in comparison to solvent control (DMSO, upper panel). Depicted  
725 is a representative observation of 2 independent experiments with similar results.  
726 Statistical analyses were carried out using One-Way ANOVA with a suitable post-hoc  
727 test for multiple comparison (d); \* p $\leq$ 0.05, \*\*\*p $\leq$ 0.001. All data are depicted as mean +/-  
728 SEM.

729  
730 **Figure S6: Incorporation of <sup>13</sup>C-oleic acid into lipids of macrophages and**  
731 **metabolization to tuberculostearic acid (TSA) to form phosphatidylinositol (PI**  
732 **16:0\_19:0 (TSA) of *Mtb*.** Mass-spectrometric analysis of <sup>13</sup>C-oleate pulsed and Mtb-  
733 infected hMDMs showing **(a)** incorporation of oleic acid into major abundant lipids of  
734 macrophages. The mass shift of <sup>13</sup>C labelled lipid species is shown in blue as determined  
735 in positive ion mode MS<sup>1</sup>. Data are from the same set of experiment as shown in Figure  
736 4g and h. **(b)** Tandem mass spectrometric analysis of <sup>13</sup>C labelled PI 16:0\_19:0 (TSA)  
737 with the precursor m/z 869.6 in the negative ion mode. Specific fragment ions for  
738 identification of the lipid are shown in blue (PI - HG: fragments ion of the  
739 phosphatidylinositol head group, TSA (<sup>13</sup>C<sub>18</sub>): isotopically labelled tuberculostearic acid  
740 with incorporation of one <sup>12</sup>C methyl group as described (Heyckendorf et al.; Biorxiv,  
741 2020). Data are from the same set of experiment as shown in Figure 4g and h and  
742 originate from infected macrophages of donor 2 after 7 days of infection (Supplementary  
743 Table I).

744  
745 **Figure S7: ACC2 is expressed in human lung tissue of TB patients and its**  
746 **inhibition by a low-dose and short-term treatment with a pharmacological**  
747 **inhibitor does not affect bacterial replication in Mtb-infected mice.**

748 **(a)** Immunohistochemical analyses of formalin-fixed and paraffin-embedded lung tissue  
749 derived from a tuberculosis patient (Patient 1). The upper panel shows consecutive  
750 sections (1  $\mu$ m) incubated with primary antibodies directed against ACC2 (left panel),  
751 ACC1/2 (middle panel) and the macrophage/monocyte marker CD68 (right panel). The  
752 lower panels show the respective consecutive section, which was incubated without

753 primary antibody (sec. AB ctrl). Antigens were visualized with a Horseradish peroxidase  
754 (HRP)-based detection system using AEC as chromogen (red). **(b)** Effect of a low-dose  
755 and short-term ACC2 inhibitor treatment on mycobacterial loads in Mtb-infected mice.  
756 After 28 days of infection with a low dose of Mtb H37Rv (~200CFU), 129/Sv mice were  
757 either left untreated (white bars), were treated with vehicle solution (grey bars) or with  
758 ACC2 inhibitor (ND-646, 25 mg/kg BW) for a period of 7 days. At day 35 p.i., Mtb  
759 bacterial burden was determined in lung, liver and spleen (n=6-10 animals per group).  
760 Statistical analyses were carried out using an one-tailed, unpaired Student's t-test; n.s.=  
761 not significant. Data are depicted as Min-Max bar with line at mean.

762

### 763 **Acknowledgements & Funding**

764 The authors are very grateful for the funding within the DFG priority program (SPP1580)  
765 (NR: Re1228 5-1, Re1228 5-2), the Cluster of Excellence 306 ("Inflammation at  
766 interfaces"), and the Deutsches Zentrum für Infektionsforschung (DZIF) within the  
767 "Thematic translational unit tuberculosis" (TTU TB; CH: TTU 02.705; NR: TTU 02.806;  
768 02.810; DS: TTU 02.704-1, 02.811). Moreover, we would like to gratefully acknowledge  
769 Carolin Golin, Lisa Niwinski and Johanna Volz for expert technical assistance.

770

### 771 **Competing interests**

772 Drs. N. Reiling and J. Brandenburg (Research Center Borstel, Leibniz Lung Center,  
773 23845 Borstel, Germany) have filed a patent application entitled "ACC inhibitors as  
774 means and methods for treating mycobacterial diseases"(WO2018007430A1, patent  
775 pending).

776

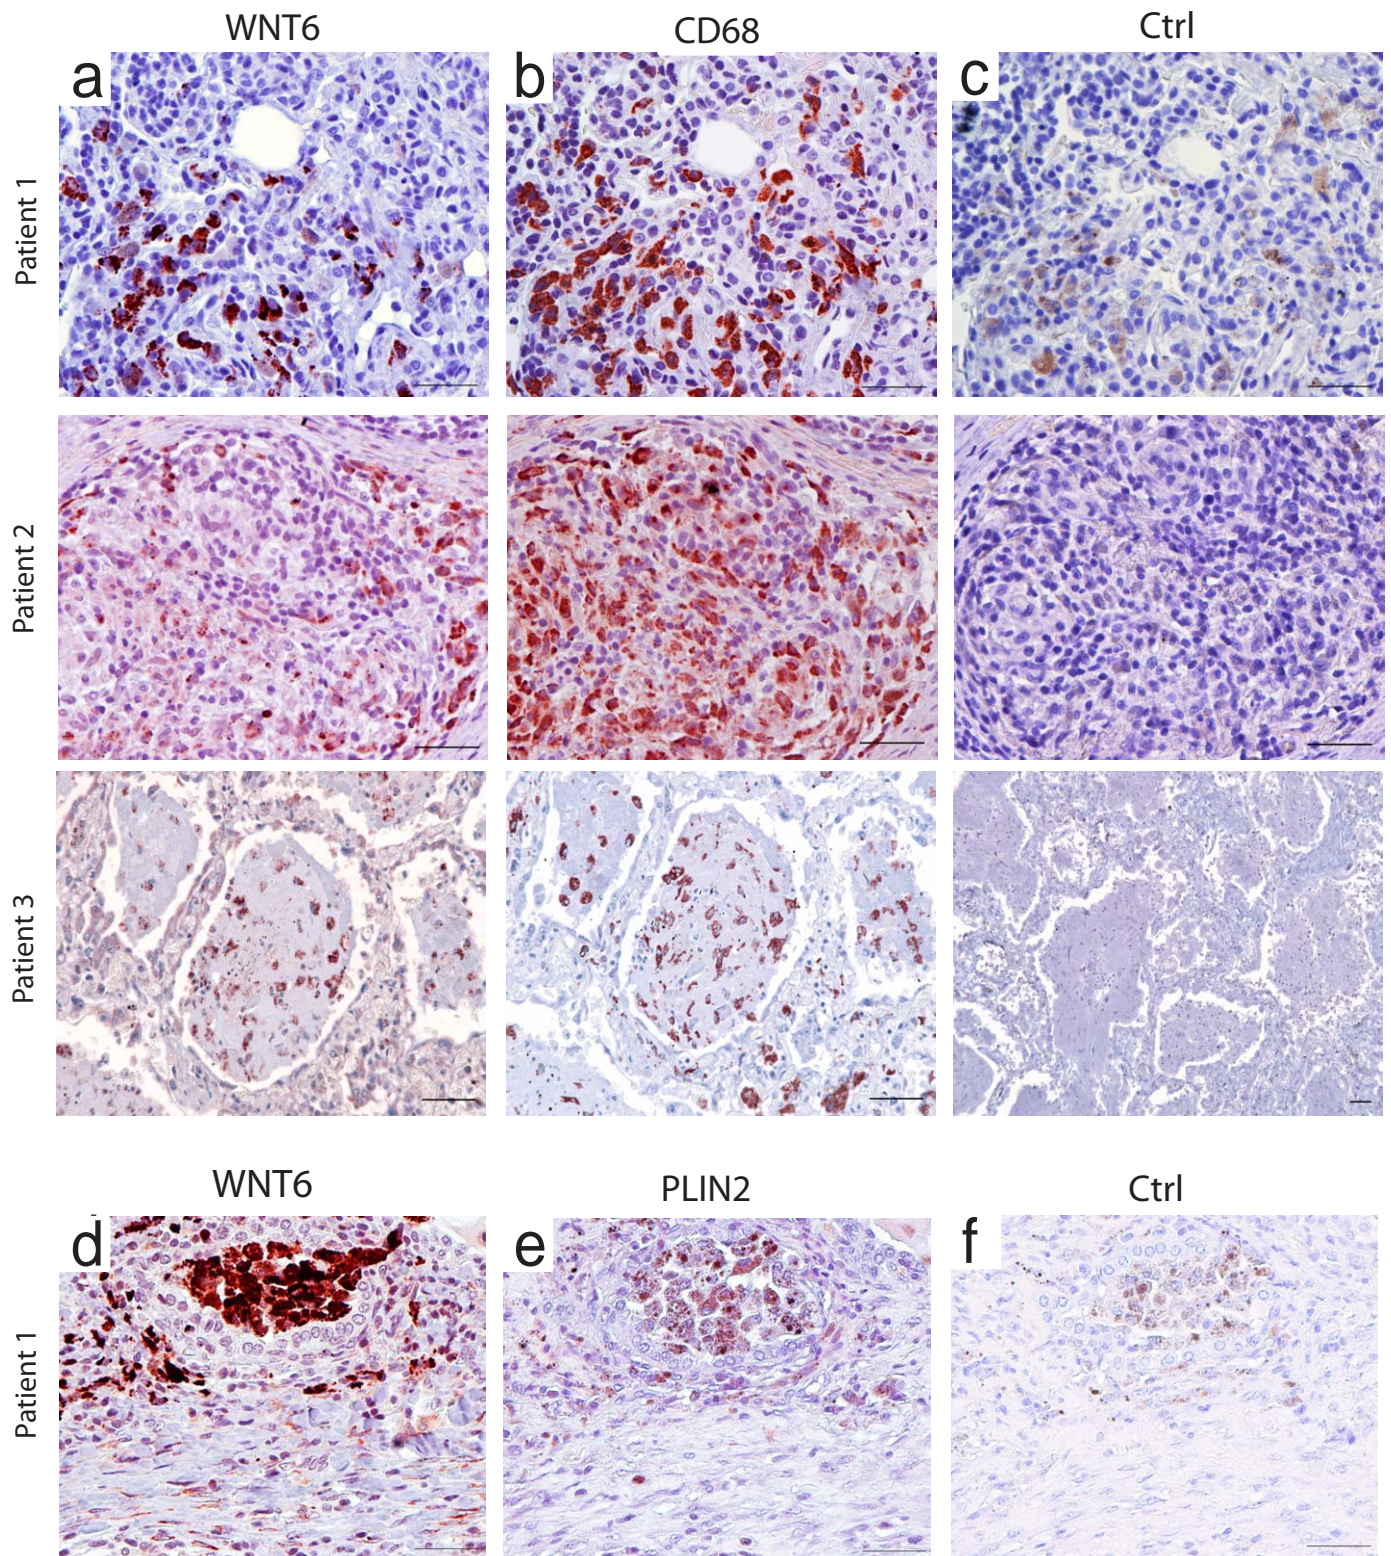

S2

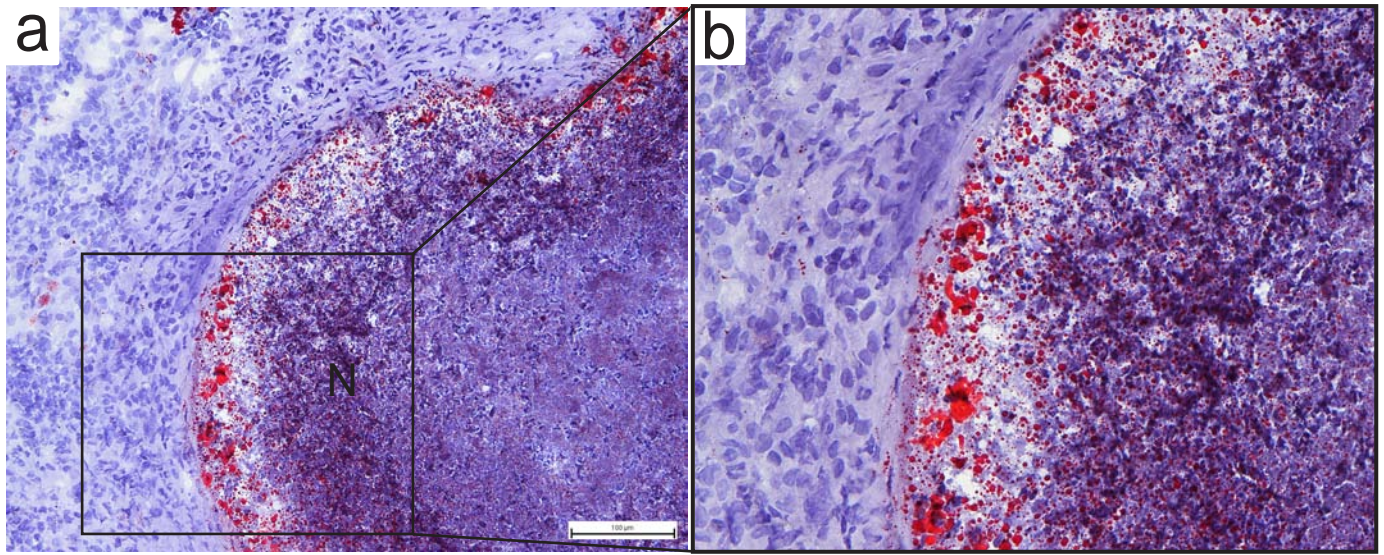

WNT6

BODIPY

Overlay

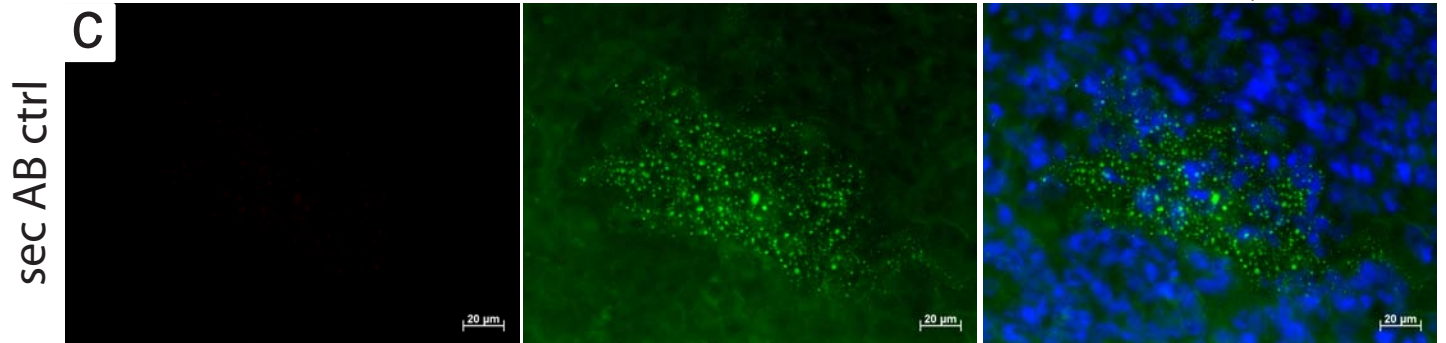

a

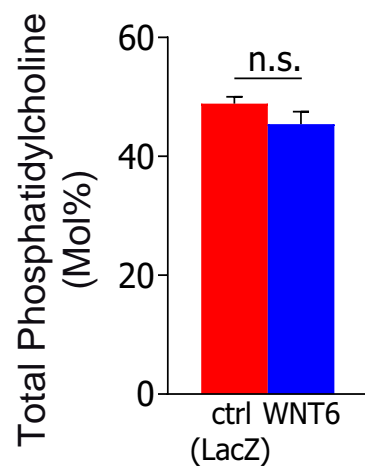

b

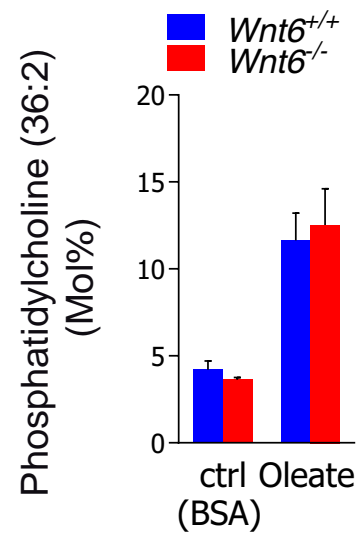

**a**

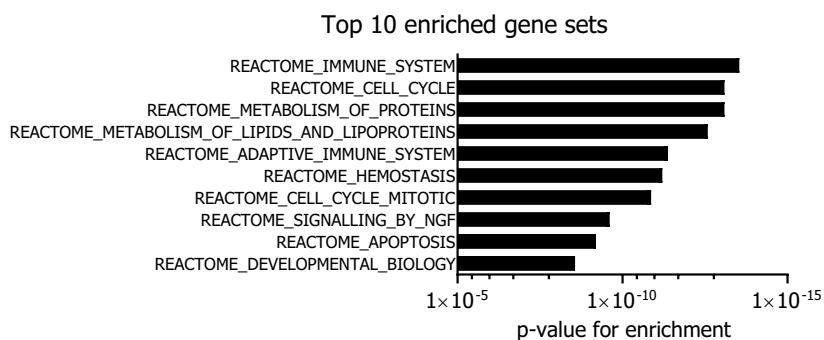

**b**

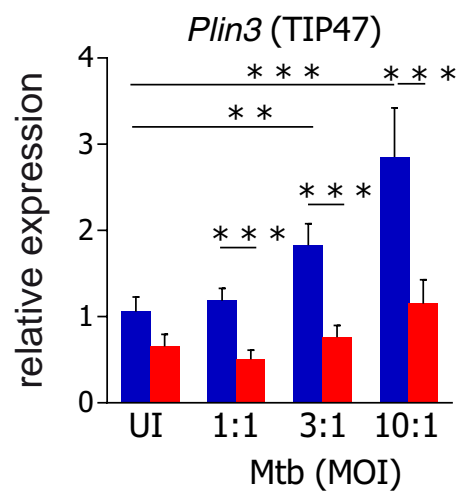

**c**

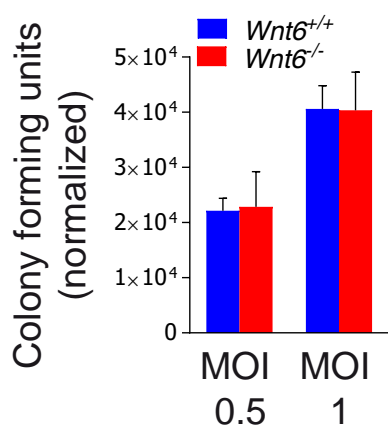

**d**

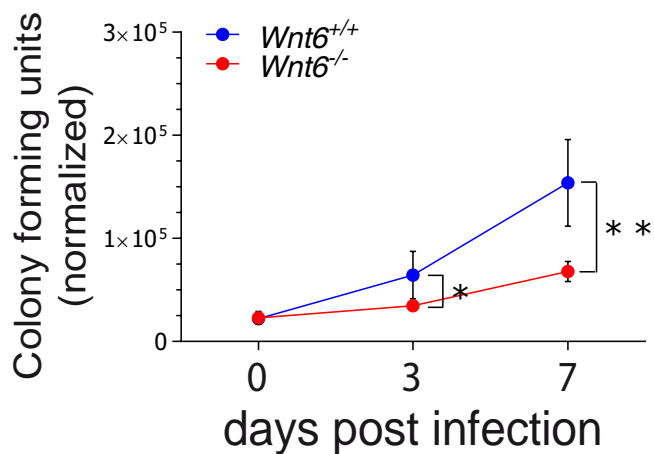

**e**

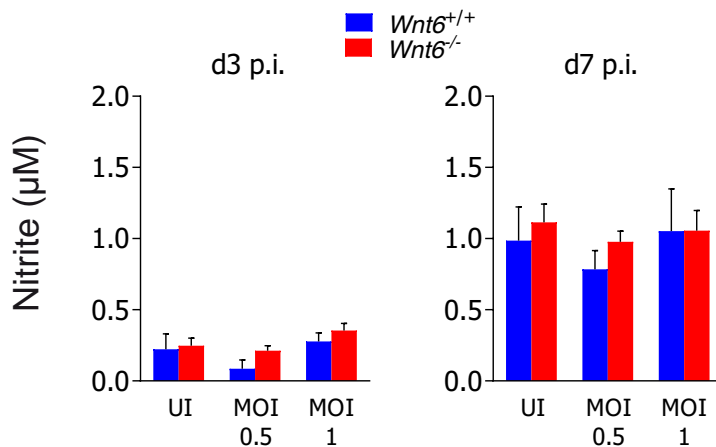

**f**

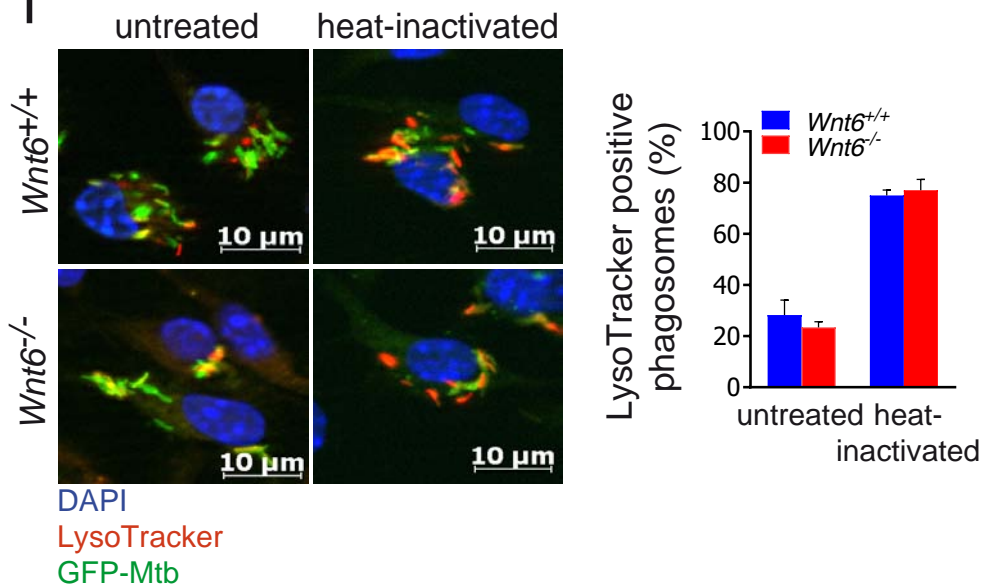

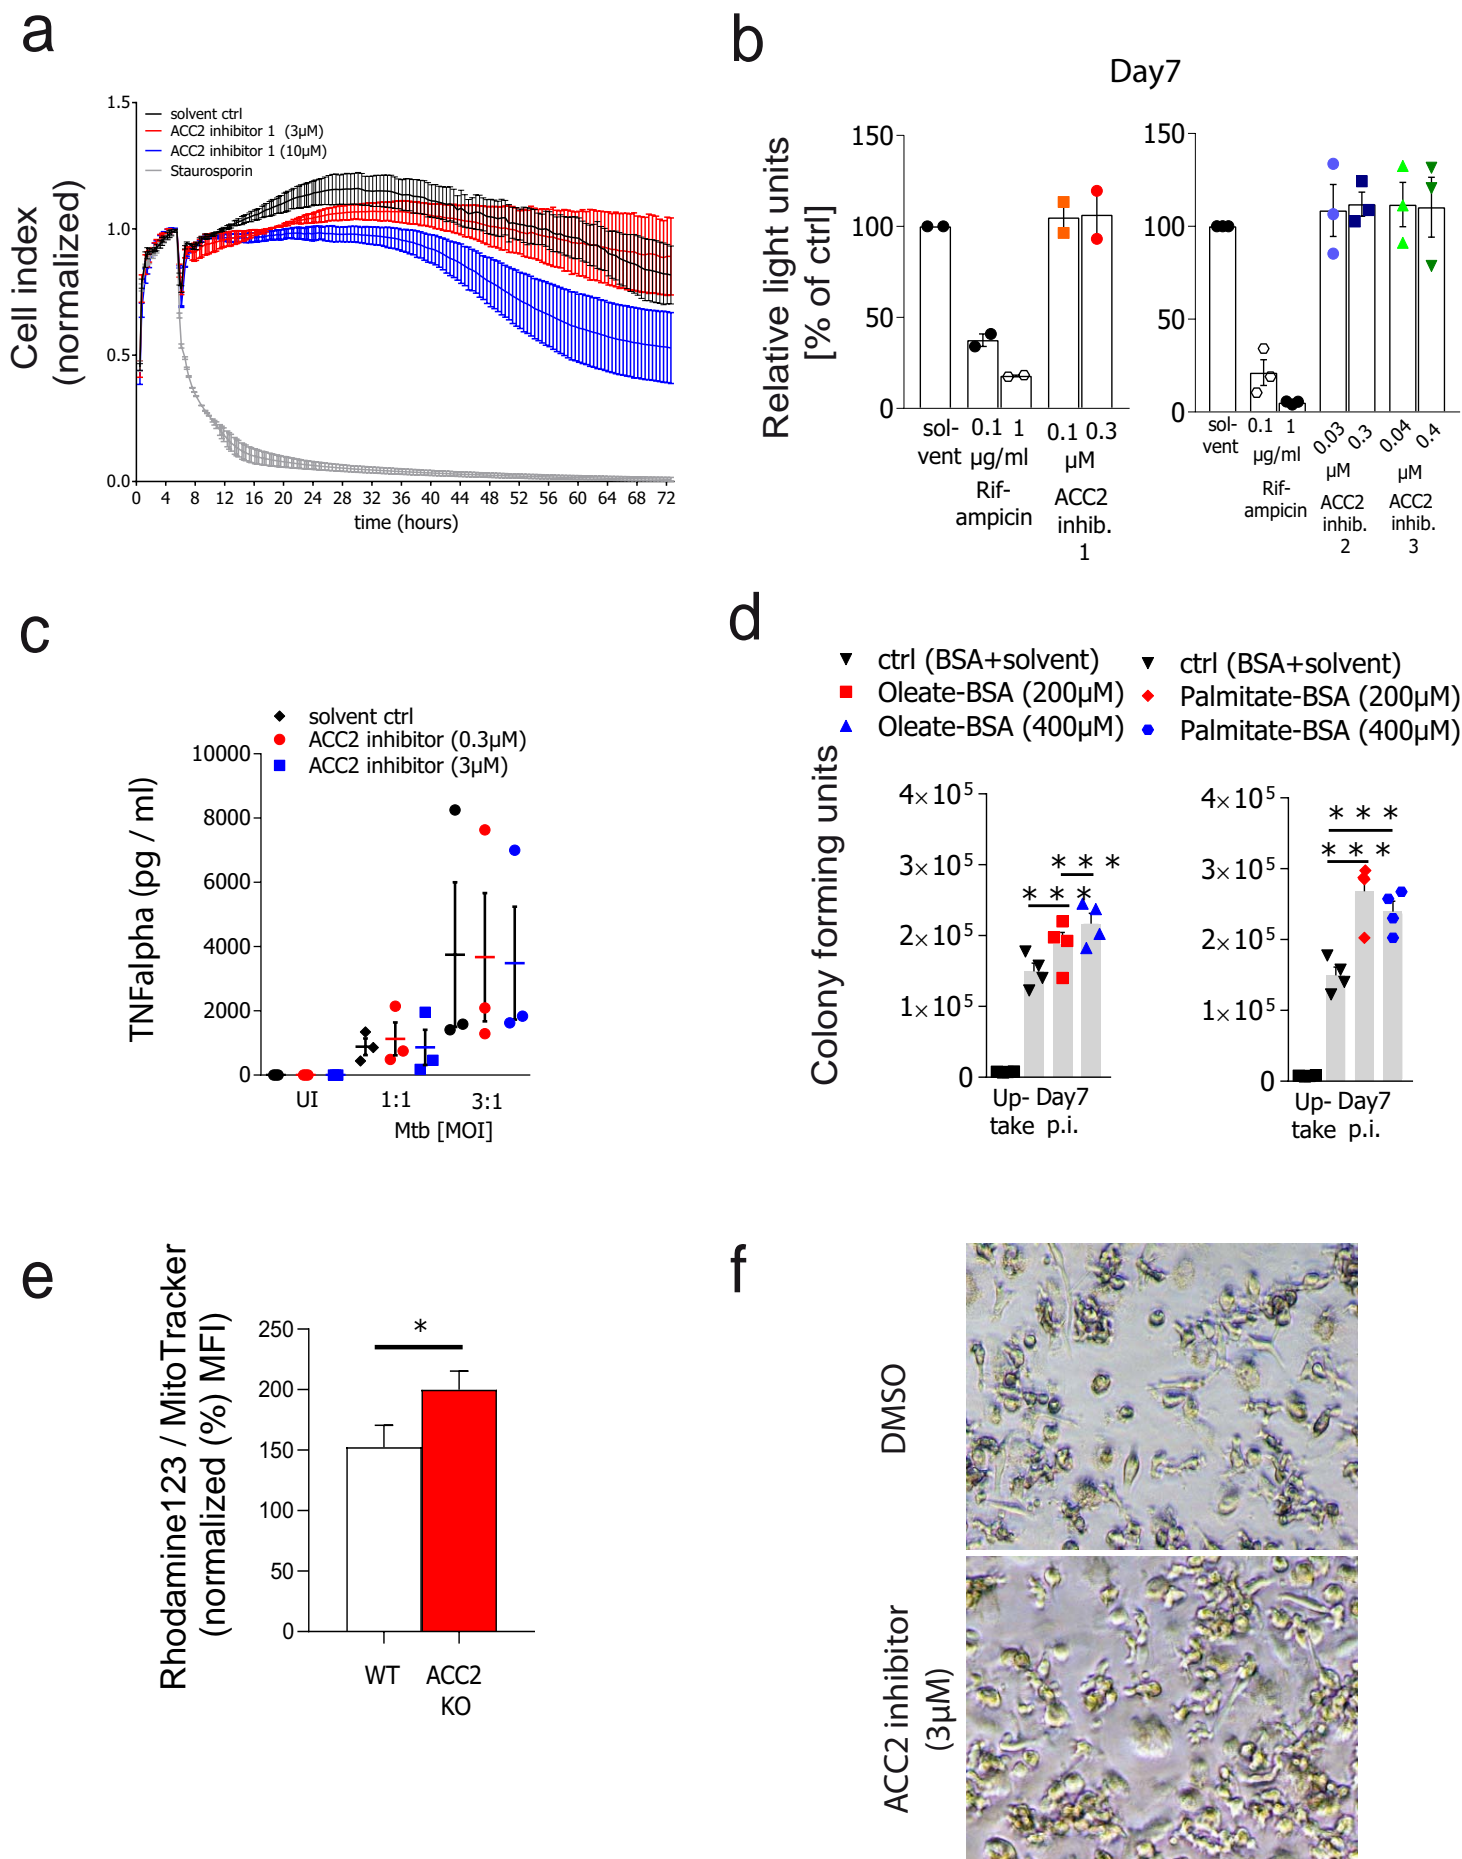



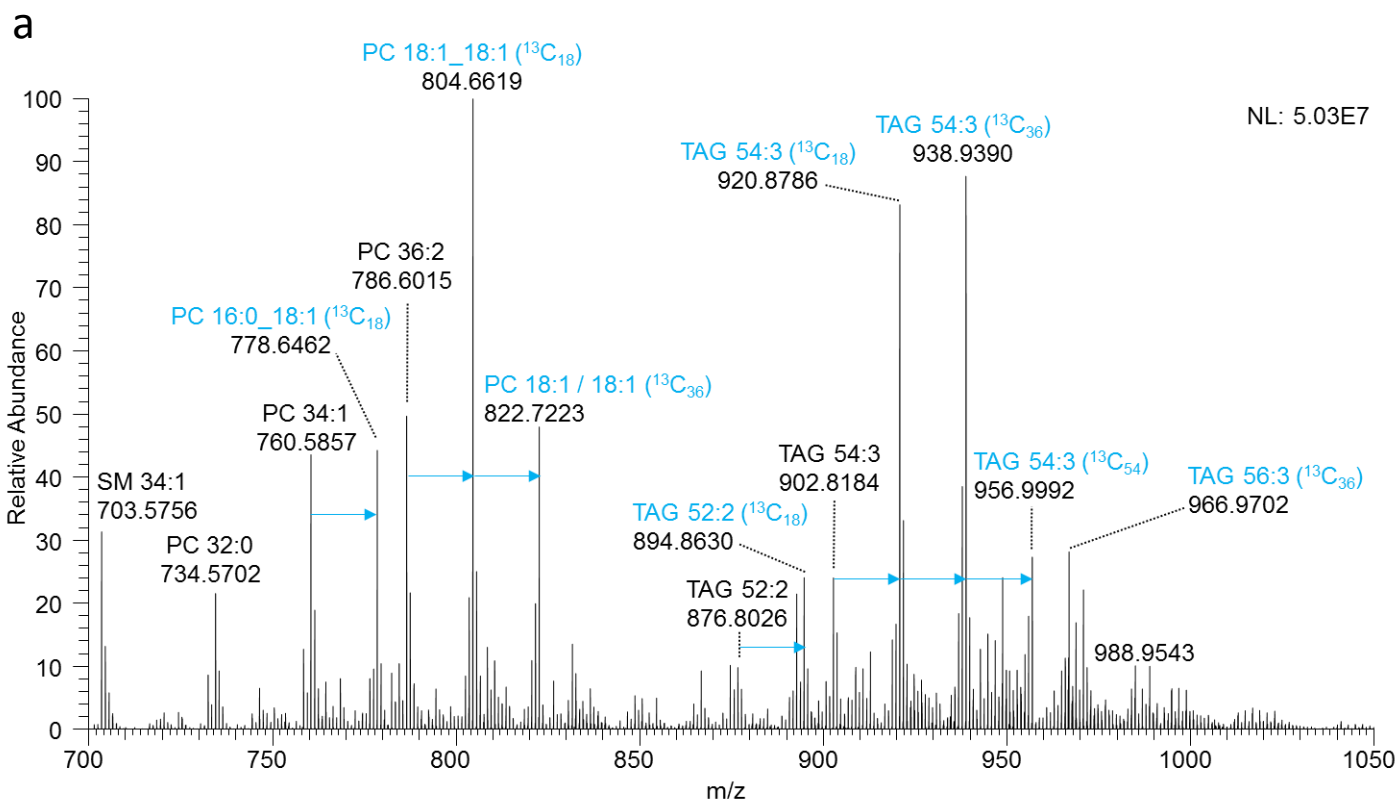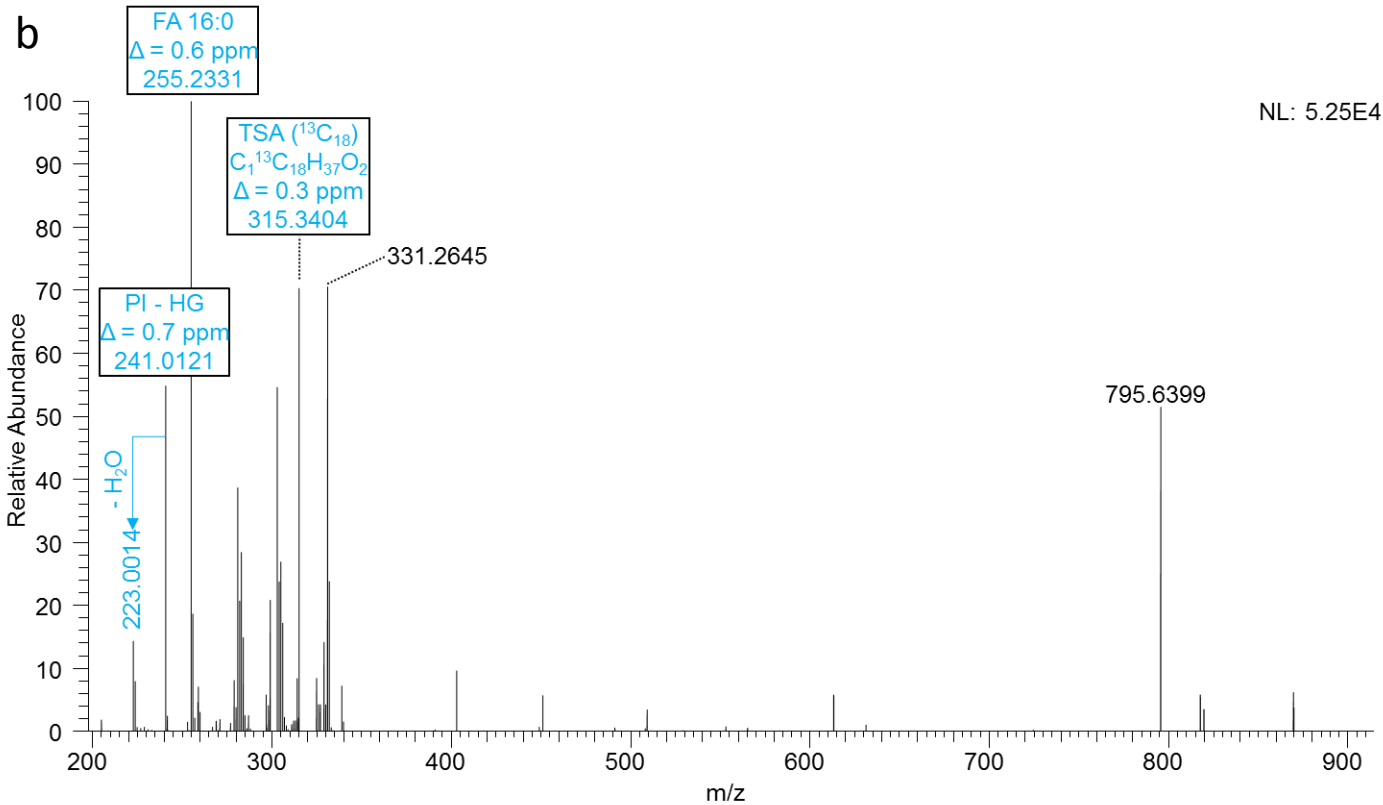

a

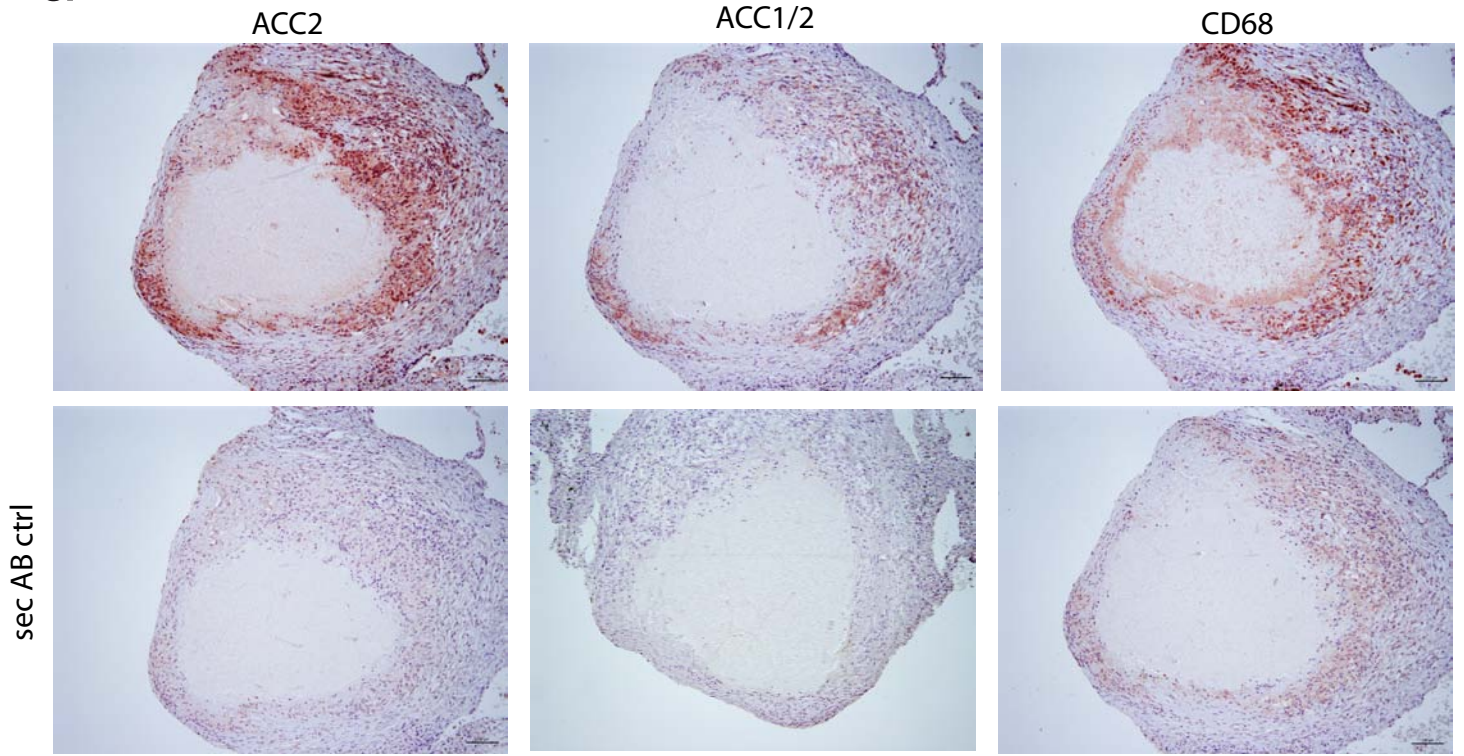

b

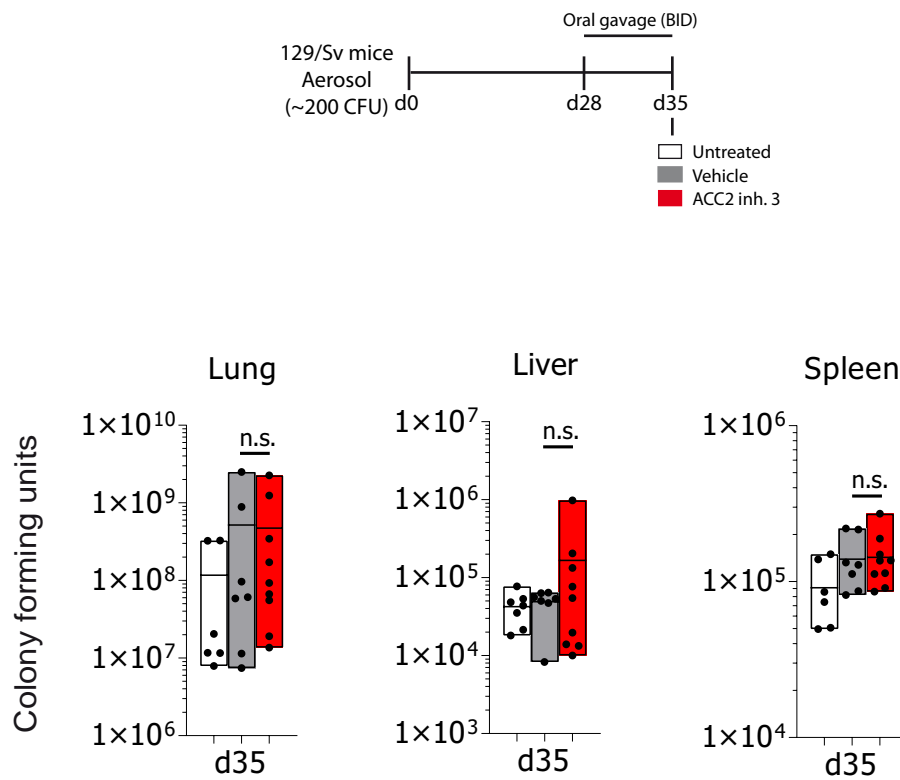

Summary for Tracer Analysis of <sup>13</sup>C<sub>18</sub> labelled Oleic Acid during *Mtb* Infection of Human Monocyte-Derived Macrophages (hMDM)

| MASS     | NAME                    | time point<br>status<br>inhibitor | 7d        |           |                    | 7d        |           |                    | 7d        |           |                    | 7d        |           |                    |
|----------|-------------------------|-----------------------------------|-----------|-----------|--------------------|-----------|-----------|--------------------|-----------|-----------|--------------------|-----------|-----------|--------------------|
|          |                         |                                   | 4h<br>inf | 7d<br>inf | 7d<br>inf<br>ND646 | 4h<br>inf | 7d<br>inf | 7d<br>inf<br>ND646 | 4h<br>inf | 7d<br>inf | 7d<br>inf<br>ND646 | 4h<br>inf | 7d<br>inf | 7d<br>inf<br>ND646 |
|          |                         | donor                             | 1         | 1         | 1                  | 2         | 2         | 2                  | 3         | 3         | 3                  | 4         | 4         | 4                  |
|          | TAG [52:2]              | %label                            | 89,3      | 44,8      | 36,4               | 90,4      | 53,4      | 44,6               | 57,7      | 17,0      | 13,0               | 78,6      | 50,6      | 60,9               |
|          | TAG [52:3]              | %label                            | 72,0      | 37,8      | 28,3               | 78,1      | 48,0      | 49,6               | 33,3      | 10,8      | 9,7                | 60,0      | 38,3      | 53,8               |
|          | TAG [54:2]              | %label                            | 92,6      | 53,5      | 42,5               | 93,2      | 61,9      | 66,2               | 69,1      | 21,0      | 21,6               | 84,5      | 59,0      | 70,6               |
|          | TAG [54:3]              | %label                            | 98,2      | 68,7      | 63,9               | 98,6      | 77,9      | 74,0               | 80,9      | 27,4      | 21,1               | 94,6      | 74,5      | 85,0               |
|          | TAG [54:4]              | %label                            | 87,4      | 35,0      | 29,7               | 85,9      | 40,1      | 50,2               | 46,7      | 9,5       | 5,7                | 72,4      | 37,9      | 54,4               |
|          | TAG [56:6]              | %label                            | 71,8      | 27,9      | 27,5               | 75,2      | 33,0      | 38,2               | 29,5      | 7,9       | 10,1               | 54,2      | 26,5      | 44,1               |
|          | TAG [52:2]              | pmol label                        | 2,81E+03  | 7,57E+01  | 5,70E+00           | 2,06E+03  | 4,42E+02  | 1,03E+01           | 4,15E+02  | 2,08E+02  | 7,78E+00           | 3,18E+03  | 2,64E+03  | 3,49E+02           |
|          | TAG [52:3]              | pmol label                        | 9,32E+02  | 4,64E+01  | 2,82E+00           | 8,12E+02  | 3,60E+02  | 2,95E+01           | 1,02E+02  | 6,35E+01  | 4,96E+00           | 1,12E+03  | 8,56E+02  | 2,59E+02           |
|          | TAG [54:2]              | pmol label                        | 1,03E+03  | 5,13E+01  | 4,19E+00           | 5,89E+02  | 2,57E+02  | 8,54E+00           | 2,98E+02  | 1,16E+02  | 4,67E+00           | 1,06E+03  | 1,52E+03  | 2,34E+02           |
|          | TAG [54:3]              | pmol label                        | 1,27E+04  | 3,87E+02  | 2,41E+01           | 7,95E+03  | 3,01E+03  | 9,50E+01           | 1,19E+03  | 4,51E+02  | 2,24E+01           | 9,63E+03  | 8,04E+03  | 1,72E+03           |
|          | TAG [54:4]              | pmol label                        | 3,13E+03  | 4,45E+01  | 3,22E+00           | 1,51E+03  | 1,97E+02  | 1,46E+01           | 2,79E+02  | 6,47E+01  | 2,42E+00           | 2,08E+03  | 8,75E+02  | 3,08E+02           |
|          | TAG [56:6]              | pmol label                        | 8,96E+02  | 7,24E+01  | 8,99E+00           | 7,84E+02  | 1,76E+02  | 2,10E+01           | 1,57E+02  | 8,34E+01  | 1,46E+01           | 7,72E+02  | 6,26E+02  | 3,61E+02           |
| 912,9225 | TAG [52:2]              | H106 C19 C136 O6 N1               | 1,86E+03  | 3,17E+01  | 2,33E+00           | 1,39E+03  | 1,92E+02  | 4,36E+00           | 1,99E+02  | 4,81E+01  |                    | 1,81E+03  | 1,11E+03  | 1,68E+02           |
| 894,8621 | TAG [52:2]              | H106 C37 C18 O6 N1                | 1,09E+03  | 7,89E+01  | 6,68E+00           | 7,65E+02  | 4,06E+02  | 1,06E+01           | 3,40E+02  | 3,88E+02  | 1,80E+01           | 1,75E+03  | 2,55E+03  | 2,75E+02           |
| 876,8018 | TAG [52:2]              | H106 C55 O6 N1                    | 1,93E+02  | 5,83E+01  | 6,64E+00           | 1,26E+02  | 2,29E+02  | 8,00E+00           | 1,80E+02  | 7,87E+02  | 3,97E+01           | 4,89E+02  | 1,54E+03  | 1,31E+02           |
| 910,9065 | TAG [52:3]              | H104 C19 C136 O6 N1               | 4,19E+02  | 1,67E+01  | 1,17E+00           | 4,22E+02  | 1,45E+02  | 1,26E+01           | 2,88E+01  | 6,97E+00  |                    | 4,57E+02  | 3,19E+02  | 1,13E+02           |
| 892,8462 | TAG [52:3]              | H104 C37 C18 O6 N1                | 6,79E+02  | 5,67E+01  | 4,55E+00           | 4,93E+02  | 3,67E+02  | 2,86E+01           | 1,43E+02  | 1,45E+02  | 1,24E+01           | 9,83E+02  | 1,02E+03  | 2,37E+02           |
| 874,7861 | TAG [52:3]              | H104 C55 O6 N1                    | 1,96E+02  | 4,94E+01  | 4,78E+00           | 1,25E+02  | 2,37E+02  | 1,82E+01           | 1,35E+02  | 4,38E+02  | 4,06E+01           | 4,22E+02  | 8,86E+02  | 1,34E+02           |
| 940,9539 | TAG [54:2]              | H110 C21 C136 O6 N1               | 7,21E+02  | 2,37E+01  | 1,55E+00           | 4,17E+02  | 1,95E+02  | 3,69E+00           | 1,54E+02  | 3,02E+01  |                    | 6,46E+02  | 7,39E+02  | 1,19E+02           |
| 922,8937 | TAG [54:2]              | H110 C39 C18 O6 N1                | 3,48E+02  | 4,53E+01  | 4,75E+00           | 1,90E+02  | 1,98E+02  | 6,79E+00           | 2,00E+02  | 1,99E+02  | 9,79E+00           | 4,96E+02  | 1,22E+03  | 1,59E+02           |
| 904,8336 | TAG [54:2]              | H110 C57 O6 N1                    | 4,74E+01  | 2,69E+01  | 3,61E+00           | 2,50E+01  | 9,20E+01  | 2,41E+00           | 7,59E+01  | 3,26E+02  | 8,27E+00           | 1,09E+02  | 6,25E+02  | 5,60E+01           |
| 938,9381 | TAG [54:3]              | H108 C21 C136 O6 N1               | 5,39E+03  | 1,80E+02  | 1,03E+01           | 3,36E+03  | 1,45E+03  | 4,56E+01           | 5,58E+02  | 1,62E+02  | 6,40E+00           | 4,63E+03  | 3,84E+03  | 8,35E+02           |
| 956,9984 | TAG [54:3]              | H108 C3 C154 O6 N1                | 5,67E+03  | 4,28E+01  | 4,39E+00           | 3,65E+03  | 3,75E+02  | 1,27E+01           | 1,98E+02  | 8,75E+00  |                    | 2,87E+03  | 1,05E+03  | 2,93E+02           |
| 920,8778 | TAG [54:3]              | H108 C39 C18 O6 N1                | 1,69E+03  | 2,32E+02  | 1,40E+01           | 9,71E+02  | 1,52E+03  | 4,92E+01           | 5,34E+02  | 6,19E+02  | 3,72E+01           | 2,30E+03  | 4,19E+03  | 7,02E+02           |
| 902,8176 | TAG [54:3]              | H108 C57 O6 N1                    | 1,81E+02  | 1,09E+02  | 8,99E+00           | 9,04E+01  | 5,23E+02  | 2,09E+01           | 1,76E+02  | 8,53E+02  | 6,28E+01           | 3,85E+02  | 1,71E+03  | 1,92E+02           |
| 936,9221 | TAG [54:4]              | H106 C21 C136 O6 N1               | 1,32E+03  | 1,32E+01  | 1,72E+00           | 9,77E+02  | 6,29E+01  | 6,40E+00           | 1,26E+02  | 5,70E+00  |                    | 1,13E+03  | 3,11E+02  | 1,49E+02           |
| 918,8620 | TAG [54:4]              | H106 C39 C18 O6 N1                | 1,30E+03  | 6,03E+01  | 3,55E+00           | 6,40E+02  | 2,44E+02  | 1,39E+01           | 2,73E+02  | 1,53E+02  | 6,50E+00           | 1,29E+03  | 1,07E+03  | 2,61E+02           |
| 900,8020 | TAG [54:4]              | H106 C57 O6 N1                    | 2,57E+02  | 5,37E+01  | 5,58E+00           | 1,42E+02  | 1,84E+02  | 8,86E+00           | 2,01E+02  | 5,20E+02  | 3,58E+01           | 4,53E+02  | 9,24E+02  | 1,56E+02           |
| 960,9217 | TAG [56:6]              | H106 C23 C136 O6 N1               | 4,78E+02  | 2,37E+01  | 3,97E+00           | 4,38E+02  | 5,64E+01  | 8,27E+00           | 5,10E+01  | 3,81E+00  |                    | 3,43E+02  | 1,77E+02  | 1,49E+02           |
| 942,8620 | TAG [56:6]              | H106 C41 C18 O6 N1                | 5,69E+02  | 1,05E+02  | 1,16E+01           | 4,57E+02  | 2,39E+02  | 2,46E+01           | 2,23E+02  | 2,09E+02  | 3,65E+01           | 6,94E+02  | 9,67E+02  | 3,82E+02           |
| 924,8022 | TAG [56:6]              | H106 C59 O6 N1                    | 2,00E+02  | 1,31E+02  | 1,72E+01           | 1,46E+02  | 2,38E+02  | 2,22E+01           | 2,59E+02  | 8,41E+02  | 1,08E+02           | 3,90E+02  | 1,22E+03  | 2,89E+02           |
|          | sum TAG OA bound (pmol) | OA bound selected                 | 2,33E+04  | 1,34E+03  | 1,17E+02           | 1,48E+04  | 6,88E+03  | 3,08E+02           | 4,05E+03  | 5,74E+03  | 4,17E+02           | 2,16E+04  | 2,55E+04  | 4,80E+03           |
|          | sum all TAG (pmol)      | all                               | 2,79E+04  | 5,05E+03  | 2,50E+02           | 2,10E+04  | 1,30E+04  | 6,68E+02           | 8,90E+03  | 1,43E+04  | 1,21E+03           | 3,33E+04  | 5,08E+04  | 1,02E+04           |
|          | PC [32:1]               | %label                            | 21,82     | 6,05      | 1,65               | 18,22     | 10,73     | 5,22               | 6,50      | 1,96      | 0,66               | 13,55     | 6,61      | 3,08               |
|          | PC [34:1]               | %label                            | 62,30     | 26,24     | 17,52              | 63,47     | 32,47     | 28,59              | 38,09     | 11,23     | 10,07              | 50,48     | 28,01     | 32,14              |
|          | PC [34:2]               | %label                            | 24,01     | 17,50     | 12,01              | 29,99     | 22,52     | 25,30              | 7,98      | 5,47      | 8,19               | 19,73     | 17,67     | 22,74              |
|          | PC [36:1]               | %label                            | 62,33     | 31,07     | 22,11              | 63,34     | 35,72     | 32,89              | 43,43     | 13,32     | 15,35              | 50,44     | 34,00     | 37,69              |
|          | PC [36:2]               | %label                            | 86,26     | 42,34     | 26,88              | 88,01     | 52,58     | 45,59              | 53,47     | 15,92     | 14,13              | 76,12     | 45,64     | 49,46              |
|          | PC [36:3]               | %label                            | 54,88     | 19,37     | 13,44              | 54,63     | 22,45     | 23,23              | 29,46     | 6,99      | 7,62               | 44,45     | 21,32     | 26,12              |
|          | PC [38:2]               | %label                            | 80,57     | 41,29     | 39,97              | 82,80     | 50,62     | 55,43              | 52,65     | 21,58     | 36,36              | 63,52     | 44,04     | 54,24              |
|          | PC [38:4]               | %label                            | 18,23     | 7,67      | 1,93               | 11,18     | 8,88      | 4,73               | 7,82      | 4,11      | 3,02               | 14,27     | 8,57      | 5,08               |
|          | PC [38:5]               | %label                            | 37,03     | 18,56     | 10,59              | 35,20     | 20,44     | 17,90              | 21,17     | 8,54      | 6,63               | 35,56     | 23,88     | 20,83              |
|          | PC-O [34:1]             | %label                            | 81,27     | 52,96     | 43,67              | 83,49     | 59,38     | 57,27              | 63,02     | 24,62     | 21,34              | 72,44     | 63,21     | 64,50              |
|          | PC [32:1]               | pmol label                        | 4,91E+01  | 1,63E+01  | 1,36E+00           | 2,76E+01  | 3,20E+01  | 7,68E+00           | 1,25E+01  | 1,69E+01  | 5,41E+00           | 3,59E+01  | 4,00E+01  | 1,36E+01           |
|          | PC [34:1]               | pmol label                        | 2,91E+03  | 6,02E+02  | 9,08E+01           | 1,41E+03  | 7,33E+02  | 1,21E+02           | 1,57E+03  | 6,57E+02  | 1,95E+02           | 1,99E+03  | 1,53E+03  | 9,55E+02           |
|          | PC [34:2]               | pmol label                        | 2,04E+02  | 9,42E+01  | 1,71E+01           | 1,15E+02  | 1,27E+02  | 7,89E+01           | 5,97E+01  | 6,57E+01  | 1,25E+02           | 1,51E+02  | 1,63E+02  | 2,08E+02           |
|          | PC [36:1]               | pmol label                        | 4,49E+02  | 1,57E+02  | 3,87E+01           | 1,85E+02  | 1,54E+02  | 3,09E+01           | 4,12E+02  | 1,22E+02  | 4,38E+01           | 2,79E+02  | 4,81E+02  | 3,02E+02           |
|          | PC [36:2]               | pmol label                        | 8,92E+03  | 1,64E+03  | 1,87E+02           | 3,66E+03  | 2,46E+03  | 4,73E+02           | 2,56E+03  | 7,97E+02  | 3,35E+02           | 4,55E+03  | 2,85E+03  | 2,22E+03           |
|          | PC [36:3]               | pmol label                        | 9,90E+02  | 9,28E+01  | 1,38E+01           | 2,93E+02  | 1,02E+02  | 3,14E+01           | 3,57E+02  | 7,79E+01  | 5,24E+01           | 4,85E+02  | 1,93E+02  | 1,95E+02           |
|          | PC [38:2]               | pmol label                        | 1,54E+02  | 9,69E+01  | 1,36E+01           | 7,22E+01  | 1,61E+02  | 3,21E+01           | 2,37E+02  | 7,30E+01  | 6,65E+01           | 1,23E+02  | 2,09E+02  | 1,58E+02           |
|          | PC [38:4]               | pmol label                        | 7,09E+01  | 3,51E+01  | 6,87E+00           | 2,53E+01  | 3,24E+01  | 6,85E+00           | 4,81E+01  | 2,88E+01  | 2,21E+01           | 4,64E+01  | 7,40E+01  | 5,96E+01           |

|                                         |                          |          |             |             |          |             |             |          |             |             |          |             |             |
|-----------------------------------------|--------------------------|----------|-------------|-------------|----------|-------------|-------------|----------|-------------|-------------|----------|-------------|-------------|
| <i>PC</i> [38:5]                        | <i>pmol label</i>        | 2,30E+02 | 1,44E+02    | 5,77E+01    | 1,29E+02 | 1,29E+02    | 7,74E+01    | 1,43E+02 | 8,09E+01    | 1,23E+02    | 1,73E+02 | 2,63E+02    | 4,48E+02    |
| <i>PC-O</i> [34:1]                      | <i>pmol label</i>        | 3,52E+02 | 5,20E+01    | 1,01E+01    | 9,10E+01 | 5,98E+01    | 9,47E+00    | 1,86E+02 | 6,56E+01    | 5,16E+00    | 1,87E+02 | 1,65E+02    | 4,35E+01    |
| 750,6141 <i>PC</i> [32:1]               | C22 H79 C18 O8 N1 P1     | 8,05E+01 | 3,07E+01    | 2,68E+00    | 4,67E+01 | 5,78E+01    | 1,46E+01    | 2,36E+01 | 3,31E+01    | 1,07E+01    | 6,32E+01 | 7,51E+01    | 2,63E+01    |
| 732,5539 <i>PC</i> [32:1]               | H79 C40 N1 O8 P1         | 1,44E+02 | 2,39E+02    | 7,98E+01    | 1,06E+02 | 2,40E+02    | 1,32E+02    | 1,69E+02 | 8,25E+02    | 7,88E+02    | 2,02E+02 | 5,31E+02    | 4,14E+02    |
| 778,6454 <i>PC</i> [34:1]               | C24 H83 C18 O8 N1 P1     | 3,58E+03 | 9,53E+02    | 1,55E+02    | 1,73E+03 | 1,11E+03    | 1,88E+02    | 2,27E+03 | 1,18E+03    | 3,54E+02    | 2,64E+03 | 2,39E+03    | 1,44E+03    |
| 760,5850 <i>PC</i> [34:1]               | H83 C42 N1 O8 P1         | 1,08E+03 | 1,34E+03    | 3,64E+02    | 4,97E+02 | 1,15E+03    | 2,34E+02    | 1,85E+03 | 4,67E+03    | 1,58E+03    | 1,29E+03 | 3,07E+03    | 1,52E+03    |
| 776,6298 <i>PC</i> [34:2]               | C24 H81 C18 O8 N1 P1     | 3,29E+02 | 1,60E+02    | 3,06E+01    | 1,77E+02 | 2,08E+02    | 1,26E+02    | 1,11E+02 | 1,25E+02    | 2,31E+02    | 2,52E+02 | 2,77E+02    | 3,39E+02    |
| 758,5695 <i>PC</i> [34:2]               | H81 C42 N1 O8 P1         | 5,18E+02 | 3,78E+02    | 1,12E+02    | 2,06E+02 | 3,57E+02    | 1,86E+02    | 6,37E+02 | 1,08E+03    | 1,29E+03    | 5,12E+02 | 6,47E+02    | 5,76E+02    |
| 806,6768 <i>PC</i> [36:1]               | C26 H87 C18 O8 N1 P1     | 5,54E+02 | 2,40E+02    | 6,34E+01    | 2,26E+02 | 2,27E+02    | 4,65E+01    | 5,74E+02 | 2,16E+02    | 7,60E+01    | 3,71E+02 | 7,18E+02    | 4,38E+02    |
| 788,6164 <i>PC</i> [36:1]               | H87 C44 N1 O8 P1         | 1,68E+02 | 2,66E+02    | 1,12E+02    | 6,55E+01 | 2,05E+02    | 4,74E+01    | 3,74E+02 | 7,03E+02    | 2,10E+02    | 1,82E+02 | 6,97E+02    | 3,62E+02    |
| 804,6611 <i>PC</i> [36:2]               | C26 H85 C18 O8 N1 P1     | 3,82E+03 | 1,87E+03    | 2,82E+02    | 1,50E+03 | 2,39E+03    | 5,24E+02    | 2,22E+03 | 1,52E+03    | 6,65E+02    | 2,68E+03 | 3,00E+03    | 2,23E+03    |
| 822,7215 <i>PC</i> [36:2]               | C8 H85 C18 O8 N1 P1      | 5,72E+03 | 6,03E+02    | 5,68E+01    | 2,37E+03 | 9,75E+02    | 1,69E+02    | 1,22E+03 | 1,78E+02    | 7,07E+01    | 2,49E+03 | 1,15E+03    | 8,88E+02    |
| 786,6007 <i>PC</i> [36:2]               | H85 C44 N1 O8 P1         | 8,10E+02 | 1,40E+03    | 3,59E+02    | 2,84E+02 | 1,31E+03    | 3,43E+02    | 1,35E+03 | 3,31E+03    | 1,63E+03    | 8,01E+02 | 2,10E+03    | 1,37E+03    |
| 802,6455 <i>PC</i> [36:3]               | C26 H83 C18 O8 N1 P1     | 1,28E+03 | 1,55E+02    | 2,43E+01    | 3,78E+02 | 1,66E+02    | 5,10E+01    | 5,51E+02 | 1,46E+02    | 9,73E+01    | 6,72E+02 | 3,17E+02    | 3,09E+02    |
| 784,5851 <i>PC</i> [36:3]               | H83 C44 N1 O8 P1         | 5,28E+02 | 3,24E+02    | 7,81E+01    | 1,57E+02 | 2,87E+02    | 8,43E+01    | 6,60E+02 | 9,69E+02    | 5,91E+02    | 4,21E+02 | 5,87E+02    | 4,37E+02    |
| 832,6925 <i>PC</i> [38:2]               | C28 H89 C18 O8 N1 P1     | 1,70E+02 | 1,37E+02    | 1,94E+01    | 7,90E+01 | 2,13E+02    | 4,12E+01    | 3,10E+02 | 1,20E+02    | 9,76E+01    | 1,50E+02 | 2,90E+02    | 2,05E+02    |
| 814,6322 <i>PC</i> [38:2]               | H89 C46 N1 O8 P1         | 2,05E+01 | 9,75E+01    | 1,46E+01    | 8,20E+00 | 1,04E+02    | 1,66E+01    | 1,39E+02 | 2,18E+02    | 8,62E+01    | 4,32E+01 | 1,82E+02    | 8,66E+01    |
| 828,6609 <i>PC</i> [38:4]               | C28 H85 C18 O8 N1 P1     | 1,20E+02 | 6,52E+01    | 1,35E+01    | 4,54E+01 | 5,95E+01    | 1,31E+01    | 8,93E+01 | 5,53E+01    | 4,29E+01    | 8,13E+01 | 1,36E+02    | 1,13E+02    |
| 810,6007 <i>PC</i> [38:4]               | H85 C46 N1 O8 P1         | 2,70E+02 | 3,92E+02    | 3,43E+02    | 1,80E+02 | 3,05E+02    | 1,32E+02    | 5,26E+02 | 6,44E+02    | 6,80E+02    | 2,44E+02 | 7,19E+02    | 1,06E+03    |
| 826,6449 <i>PC</i> [38:5]               | C28 H83 C18 O8 N1 P1     | 3,35E+02 | 2,43E+02    | 1,04E+02    | 1,91E+02 | 2,14E+02    | 1,31E+02    | 2,37E+02 | 1,49E+02    | 2,30E+02    | 2,54E+02 | 4,25E+02    | 7,42E+02    |
| 808,5850 <i>PC</i> [38:5]               | H83 C46 N1 O8 P1         | 2,85E+02 | 5,33E+02    | 4,43E+02    | 1,76E+02 | 4,16E+02    | 3,01E+02    | 4,41E+02 | 7,99E+02    | 1,63E+03    | 2,30E+02 | 6,78E+02    | 1,41E+03    |
| 746,6062 <i>PC-O</i> [34:1]             | H85 C42 N1 O7 P1         | 8,09E+01 | 4,65E+01    | 1,30E+01    | 1,80E+01 | 4,09E+01    | 7,07E+00    | 1,09E+02 | 2,01E+02    | 1,90E+01    | 7,11E+01 | 9,60E+01    | 2,37E+01    |
| 764,6663 <i>PC-O</i> [34:1]             | C24 H85 C18 O7 N1 P1     | 3,52E+02 | 5,20E+01    | 1,01E+01    | 9,10E+01 | 5,98E+01    | 9,47E+00    | 1,86E+02 | 6,56E+01    | 5,16E+00    | 1,87E+02 | 1,65E+02    | 4,35E+01    |
| sum <i>PC</i> <i>OA</i> bound (pmol)    | <i>OA</i> bound selected | 2,02E+04 | 9,52E+03    | 2,68E+03    | 8,54E+03 | 1,01E+04    | 2,80E+03    | 1,40E+04 | 1,72E+04    | 1,04E+04    | 1,38E+04 | 1,82E+04    | 1,40E+04    |
| sum all <i>PC</i> (pmol)                | all                      | 2,41E+04 | 1,39E+04    | 4,73E+03    | 1,05E+04 | 1,39E+04    | 4,30E+03    | 2,04E+04 | 2,66E+04    | 1,91E+04    | 1,76E+04 | 2,69E+04    | 2,30E+04    |
| 668,6343 <i>Chol</i> [18:1]             | H82 C45 O2 N1            | 1,40E+02 | 9,79E+01    | 3,14E+01    | 2,24E+01 | 1,18E+02    | 4,32E+00    | 2,46E+01 | 2,30E+02    | 7,61E+01    | 8,67E+01 | 3,65E+02    | 1,45E+02    |
| 686,6944 <i>Chol</i> [18:1]             | H82 C27 C18 O2 N1        | 3,43E+02 | 5,01E+01    | 6,04E+00    | 3,05E+01 | 8,06E+01    | 2,62E+00    | 1,54E+01 | 5,81E+01    | 1,98E+01    | 9,89E+01 | 2,72E+02    | 8,76E+01    |
| <b><i>TAG / PC Ratio (OA bound)</i></b> | <i>OA</i> bound selected | 1,15     | 0,14        | 0,04        | 1,74     | 0,68        | 0,11        | 0,29     | 0,33        | 0,04        | 1,56     | 1,40        | 0,34        |
| <b><i>TAG / PC Ratio (all)</i></b>      | all                      | 1,16     | <b>0,36</b> | <b>0,05</b> | 2,00     | <b>0,94</b> | <b>0,16</b> | 0,44     | <b>0,54</b> | <b>0,06</b> | 1,90     | <b>1,89</b> | <b>0,44</b> |
| <i>Chol</i> 18:1 / <i>PC</i> Ratio      | <i>OA</i> bound selected | 0,024    | 0,016       | 0,014       | 0,006    | 0,020       | 0,002       | 0,003    | 0,017       | 0,009       | 0,013    | 0,035       | 0,017       |
| % Label <i>TAG</i>                      | <i>OA</i> bound selected | 92,2     | 50,6        | 42,0        | 92,5     | 64,6        | 58,1        | 60,1     | 17,2        | 13,6        | 82,4     | 57,2        | 67,3        |
| % Label <i>PC</i>                       | <i>OA</i> bound selected | 70,8     | 30,8        | 16,3        | 70,4     | 39,5        | 31,0        | 39,8     | 11,5        | 9,4         | 57,9     | 32,7        | 32,8        |
| % Label <i>Chol</i> [18:1]              | <i>OA</i> bound selected | 71,0     | 33,7        | 16,1        | 57,4     | 40,6        | 37,0        | 38,2     | 20,2        | 20,5        | 54,1     | 42,9        | 38,4        |
| 869,6272 <i>PI</i> [i-19:0_16:0]        | H84 C26 C18 O13 P1       | 0,00E+00 | 8,70E+00    | 1,15E+01    | 0,00E+00 | 3,03E+01    | 8,02E+00    | 0,00E+00 | 6,08E+00    | 6,42E+00    | 0,00E+00 | 6,79E+00    | 1,50E+01    |
| 851,5672 <i>PI</i> [19:0_16:0]          | H84 C44 O13 P1           | 8,19E+00 | 4,98E+00    | 1,19E+01    | 3,85E+00 | 1,27E+01    | 4,38E+00    | 6,04E+00 | 7,39E+00    | 9,01E+00    | 4,83E+00 | 4,31E+00    | 9,31E+00    |
| <b>% Label <i>PI</i> [19:0_16:0]</b>    |                          | 0,0      | <b>63,5</b> | <b>49,3</b> | 0,0      | <b>70,4</b> | <b>64,7</b> | 0,0      | <b>45,1</b> | <b>41,6</b> | 0,0      | <b>61,2</b> | <b>61,7</b> |

**values** presented in Figure 4g,h  
**values** pmol lipid species  
**values** pmol of <sup>13</sup>C<sub>18</sub> labelled *OA* in lipid species  
**values** percentage of lipid labelled with <sup>13</sup>C<sub>18</sub>

777 **Materials and Methods**

778

779 **Mice and macrophages**

780 129/Sv mice were purchased from Janvier (Le Genest-Saint-Isle, France). NMRI *Wnt6*<sup>+/-</sup>  
781 or *Wnt6*<sup>-/-</sup> and *IL-13*-overexpressing mice were raised and maintained under specific  
782 pathogen-free conditions. The *Wnt6* null allele was generated as described previously<sup>77</sup>.

783 NMRI *Wnt6*<sup>-/-</sup> mice were generated by heterozygous mating at the Research Center  
784 Borstel. *IL-13* overexpressing mice were generated as described elsewhere<sup>78</sup> and kindly  
785 provided by Andrew McKenzie (Cambridge, UK).

786 To generate bone-marrow derived macrophages (BMDM), mice were sacrificed, and  
787 bone-marrow cells were flushed out from femora and tibiae with ice-cold DMEM as  
788 described previously<sup>79</sup>. To yield high purity and remove contaminating fibroblasts<sup>80</sup>,

789 bone-marrow cells were first cultivated in Nunclon Delta cell culture dishes (Thermo  
790 Fisher, Waltham, USA) for 24 hours. Only non-adherent cells were collected, and  
791 incubated for 7 days in cell culture dishes (Sarstedt, Nümbrecht, Germany) in DMEM

792 containing 10 mM HEPES, 1 mM sodium pyruvate, 4 mM glutamine (Biochrome, Berlin,  
793 Germany), 10% of heat-inactivated fetal calf serum (FCS; Pan-Biotek, Aidenbach,  
794 Germany), supplemented with 50 ng/ml macrophage colony stimulating factor (M-CSF;

795 Bio-Techne, Minneapolis, USA)<sup>81</sup>. To obtain quiescent tissue macrophages<sup>82</sup>, peritoneal  
796 exudate cells (PEC) were isolated from the resting peritoneal cavity of mice as described  
797 previously<sup>79</sup>. To generate human monocyte-derived macrophages (hMDM), peripheral

798 blood monocytes (purity consistently >92%) were obtained by counterflow centrifugation  
799 from peripheral blood mononuclear cells (PBMCs) of healthy blood donors.  
800 Subsequently, isolated cells were incubated for 7 days in Teflon bags (VueLife 72C;

801 Cellgenix, Freiburg, Germany) in VLE RPMI 1640 (Biochrome) containing 4% human  
802 AB serum, 4 mM glutamine, 1% penicillin/streptomycin (Merck, Darmstadt, Germany)  
803 and 10 ng/ml recombinant human M-CSF as described previously<sup>83</sup>. All cells were

804 incubated in cell culture medium with the omission of M-CSF before proceeding further.  
805

806 ***M. tuberculosis* strains and *in vitro* growth assays**

807 *M. tuberculosis* strain H37Rv (ATCC 27294; American Type Culture Collection,  
808 Manassas, VA), GFP-expressing *M. tuberculosis* (H37Rv::pMN::437<sup>84</sup> or  
809 H37Rv::psVM4<sup>85</sup>), and mCherry-expressing *M. tuberculosis*<sup>86</sup> were harvested at mid-log

810 phase (OD<sub>600nm</sub> ~0.3) and stored as frozen aliquots at -80°C as described previously<sup>83</sup>.

811 For *M. tuberculosis* growth analysis in liquid culture, frozen aliquots were thawed,  
812 centrifuged (2300×g, 10 minutes) and bacteria in 7H9 medium supplemented with 10%  
813 Oleic Albumin Dextrose Catalase (OADC) (Sigma, St.Louis, USA) thoroughly  
814 homogenized by use of a syringe and a 26-gauge syringe needle. Subsequently, 2 ×  
815 10<sup>6</sup> bacteria were cultured in a total volume of 100 μL in a black 96-well plate with a  
816 clear bottom (Corning, New York, USA) and were sealed with an air-permeable  
817 membrane (Porvair Sciences, Wrexham, UK). Growth was measured as relative light  
818 units at 528 nm after excitation at 485 nm in a fluorescence microplate reader (Synergy  
819 2, BioTek Instruments, Vermont, USA) at the indicated time points.

820

### 821 **Infection of macrophages and mice**

822 For *in vitro* infection experiments, Mtb bacteria from frozen aliquots were homogenized  
823 as described above and resuspended in cell culture medium. Cells were infected with  
824 the indicated dose of bacteria (multiplicity of infection (MOI)) and, if not indicated  
825 otherwise, incubated for 4 hours (37°C, 5% CO<sub>2</sub>), followed by extensive washing with  
826 Hanks Buffered Salt Solution (HBSS, Sigma) in order to remove extracellular bacteria.  
827 Subsequently, cells were treated with solvent/carrier control, the indicated inhibitor or  
828 fatty acids for up to 7 days (37°C, 5% CO<sub>2</sub>).

829 For quantification of viable colony forming units (CFU) in macrophages, cells were lysed  
830 by incubation with 2% Saponin in HBSS and lysates were serially diluted in 0.05%  
831 Tween-80 / dH<sub>2</sub>O and plated on 7H10 agar plates containing 10% heat-inactivated  
832 bovine serum (Merck, Darmstadt, Germany). Plates were incubated for 3 to 4 weeks at  
833 37°C. Before lysing cells, images were taken at defined positions of each well by use of  
834 a bright field microscope (DM LB, Leica Biosystems, Wetzlar, Germany) and a digital  
835 camera (Sight DS-L11, Nikon, Tokio, Japan). The number of cells within a well was  
836 enumerated by analyzing images with a counting tool (Adobe Photoshop CS5 software,  
837 Version 12.04 and earlier). The Mtb/macrophage ratios were calculated at the individual  
838 time point based on the obtained CFU data and the enumerated number of cells per  
839 well.

840 C57BL/6, 129/Sv and *IL-13* overexpressing mice were infected via the aerosol route  
841 with *M. tuberculosis* H37Rv (see above) as described previously<sup>26,87</sup>. During infection  
842 experiments, mice were kept under barrier conditions in the biosafety level 3 facility at  
843 the Research Center Borstel in individually ventilated cages. For analysis of lung  
844 bacterial loads, lungs from sacrificed animals were removed aseptically, weighed and

845 homogenized in PBS containing a proteinase inhibitor cocktail (Roche Diagnostics,  
846 Mannheim, Germany) using the FastPrep™ System (MP Biomedicals, Solon, USA).  
847 Tenfold serial dilutions of organ homogenates were plated onto Middlebrook 7H10 agar  
848 plates containing 10 % heat-inactivated FBS. After an incubation at 37°C for 21 days,  
849 colonies on plates were enumerated. All animals were weighed regularly before and  
850 after infection using a laboratory balance, and as a means for evaluating disease  
851 progression the body weight change was calculated.

852

### 853 **Stimuli and inhibitors**

854 For *in vitro* infection experiments, dimethylsulfoxid (DMSO for cell culture; Sigma) was  
855 used to solubilize N-(1-(2'-(4-Isopropoxyphenoxy)-2,5'-bithiazol-5-yl)ethyl)acetamide  
856 (“ACC2 inhibitor 1”; ab142090; purchased from Abcam, Cambridge, UK), 5-[1'-(1-  
857 cyclopropyl-4-methoxy-3-methylindole-6-carbonyl)-4-oxospiro[3H-chromene-2,4'-  
858 piperidine]-6-yl]pyridine-3-carboxylic acid (“ACC2 inhibitor 2” known as MK-4074<sup>39</sup>;  
859 purchased from MedChemExpress, Sollentuna, Sweden) and 1,4-dihydro-1-[(2R)-2-(2-  
860 methoxyphenyl)-2-[(tetrahydro-2H-pyran-4-yl)oxy]ethyl]-a,a,5-trimethyl-6-(2-oxazolyl)-  
861 2,4-dioxothieno[2,3-d]pyrimidine-3(2H)-acetamide (“ACC2 inhibitor 3” known as ND-  
862 646<sup>52</sup>; MedChemExpress, Sollentuna, Sweden). DMSO served as a solvent control  
863 (0.1% in cell culture medium).

864 <sup>12</sup>C-Oleic acid (pure, pharma grade; Applichem, Munich, Germany), and <sup>12</sup>C-Palmitic  
865 acid (Sigma) were conjugated to the carrier protein Bovine Serum Albumin (BSA;  
866 Applichem or Sigma (low-endotoxin, fatty-acid free)) according to the protocol of  
867 Listenberger et al<sup>88</sup>. Briefly, a solution of 20 mM fatty acid in 0.01 M NaOH was incubated  
868 at 70°C for 30 minutes, followed by dropwise addition of 1 M NaOH facilitating the  
869 solubilisation of the fatty acid. Solubilised fatty acids were complexed to BSA in PBS at  
870 a 8:1 fatty acid to BSA molar ratio. The complexed fatty acids or BSA alone were added  
871 to serum-containing cell culture medium to achieve different fatty acid concentrations or  
872 a suitable control. Inhibitors and fatty acids were added to the cells after removing  
873 extracellular bacteria by washing in order to avoid interference with bacterial uptake.

874

### 875 **ACC2 inhibitor treatment of mice**

876 To study the effect of ACC2 inhibition on Mtb infection *in vivo*, ACC inhibitor 3 (ND-646)<sup>52</sup>  
877 was administered by oral gavage twice a day (BID)) at a concentration of 25 mg/kg  
878 bodyweight (BW). The corresponding volume of a vehicle solution (0.9% NaCl / 1% [v/v]

879 Tween-80 / 30% [w/v] Captisol (CyDex Pharmaceuticals, San Diego, USA)) with the  
880 omission of ND-646 served as treatment control. Moreover, mice were treated either  
881 with isoniazid alone (10 mg/kg BW, Sigma) or as a combination of isoniazid with ACC2  
882 inhibitor. Treatment was started at day 28 p.i. and conducted for a period of 7 days  
883 (Vehicle vs. ACC2 inhibitor) or for 14 days with isoniazid and isoniazid plus ACC2  
884 inhibitor.

885

### 886 **NIH3T3 cells and generation of WNT6 conditioned medium**

887 *Wnt6*-transfected NIH3T3 cells were a kind gift of Prof. S. Vainio (University of Oulu,  
888 Oulu, Finland). In order to yield highly pure WNT6 expressing clones, single cells were  
889 placed in 96-well plates using a FACSAria IIu cell sorter (Becton Dickinson (BD),  
890 Franklin Lake, USA) with an automated cell deposition unit (ACDU). The resulting clones  
891 were screened for WNT6 expression and selected accordingly. Control-transfected  
892 (LacZ) NIH3T3 cells were a kind gift of Prof. R. Kemler (Max-Planck-Institute for  
893 Immunobiology and Epigenetics, Freiburg, Germany). To generate conditioned medium  
894 (CM), culture supernatants of NIH3T3 cells grown for 3 days were collected, filtered  
895 through a 0.2- $\mu$ m filter and stored at  $-80^{\circ}\text{C}$  until further usage. CM derived from cells  
896 overexpressing and secreting WNT6 (referred to as WNT6 CM) or from a similar number  
897 of control (LacZ) cells (referred to as Control CM) were used for stimulation experiments  
898 with macrophages.

899

### 900 **BLaER1 cells and generation of functional protein knockouts using CRISPR/Cas9**

901 B cell leukemia C/EBP $\alpha$ ER clone 1 (BLaER1) cells<sup>40</sup>, a kind gift from Thomas Graf  
902 (Center for Genomic Regulation, Barcelona, Spain), were cultivated at a cell density  
903 between  $1.5 \times 10^5$  and  $1.5 \times 10^6$  cells / mL in VLE RPMI containing 10% of heat-inactivated  
904 fetal calf serum, 4 mM glutamine and 1% penicillin/streptomycin. In order to generate  
905 functional protein knockouts of ACC1 and ACC2, CRISPR/Cas9-mediated genome  
906 editing was used as described recently<sup>41</sup>. In detail, the Benchling online software  
907 ([www.benchling.com](http://www.benchling.com), San Francisco, USA) was used to design gRNA sequences with  
908 a low off target score targeting the protein-coding regions of *ACACA* or *ACACB* gene,  
909 respectively (5' - TTTGGGGATCTCTAGCCTAC -3' and 5'-  
910 TAGGGAGTTTCTCCGCGGAC -3'). Oligodeoxyribonucleotides (purchased from  
911 Eurofins Genomics, Ebersberg, Germany) encoding the gRNA sequences were cloned  
912 into pU6-(BbsI)-CBh-Cas9-T2A-BFP<sup>89</sup> (a kind gift from Ralf Kuehn (Max-Delbrück-



913 Center for Molecular Medicine, Berlin, Germany) plasmid [Addgene, #64323]) using the  
914 BbSI restriction site followed by propagation of the plasmid in *E. coli* DH5 $\alpha$  (New  
915 England Biolabs, Frankfurt, Germany). Subsequently,  $1 \times 10^6$  BLaER1 cells were  
916 transfected with 2  $\mu$ g plasmid DNA using the Human B Cell Nucleofector Kit and  
917 Nucleofector I device (program U-15; both Lonza, Basel, Schweiz). On day 2 post  
918 transfection, BFP<sup>+</sup> cells were single-cell-sorted into 96-well plates using a FACSAria IIu  
919 (BD Biosciences). After 3 weeks, DNA was isolated from the clones using the  
920 QuickExtract DNA Extraction Solution (Lucigen, Middleton, USA). Upon amplification  
921 and sequencing (Eurofins Genomics, Ebersberg, Germany) of side-specific gene  
922 stretches, the occurrence of InDels was determined using the Tracking of Indels by  
923 DEcomposition (TIDE) online software<sup>90</sup>. For further analysis only clones with frameshift  
924 mutations on both alleles (identified InDels for ACC1 and ACC2 KO cells were -7/+1 and  
925 -1/+2, respectively) were used, since homozygous frameshift InDels cause alterations  
926 in the protein-coding region leading to mRNA decay or generation of a nonfunctional  
927 protein<sup>91</sup>.

928 Transdifferentiation of wildtype (WT), ACC1 and ACC2 KO BLaER1 cells into  
929 macrophages was induced by cultivating cells in presence of 10 ng/ml recombinant  
930 human M-CSF, 10 ng/ml IL-3 (PeproTech, Hamburg, Germany) and 100nM  $\beta$ -estradiol  
931 (Sigma) for 7 days. After seeding BLaER1 macrophages onto coated (natural mussel  
932 adhesive protein, Abcam, UK) culture plates (Nunc) cells were incubated in cell culture  
933 medium in the absence of IL-3 and  $\beta$ -estradiol overnight before proceeding further.

934

### 935 **Real-time quantitative PCR**

936 Cells of human or murine origin ( $0.2-1 \times 10^6$ ) were lysed in Trizol (peqGOLD TriFast™;  
937 VWR International, Radnor, USA) and total RNA was extracted by use of the DirectZol®  
938 RNA MiniPrep (Zymo Research, Irvine, CA, USA) according to the manufacturer's  
939 instructions. For reverse transcription of isolated RNA, the Maxima First Strand cDNA  
940 Synthesis Kit for real-time quantitative PCR (RT-qPCR; Thermo Fisher) was used.  
941 Gene-specific primer pairs and TaqMan probes (Universal Probe Library (UPL), Roche  
942 Applied Science, Mannheim, Germany) were designed with the UPL assay design  
943 center (ProbeFinder Version 2.45 and earlier versions; sequences and probes are given  
944 in Table I. RT-qPCR was performed using the LightCycler 480 Probe Master Kit and the  
945 LightCycler 480 II system (Roche Applied Science) as described previously<sup>92</sup>. Crossing  
946 point values of target and reference gene (hypoxanthine-guanine

947 phosphoribosyltransferase, HPRT) were determined by the second derivative maximum  
 948 method. Relative gene expression was calculated with the E-Method<sup>93</sup> considering the  
 949 individual efficiency of each PCR setup determined by a standard curve or, if this was  
 950 not possible, by the  $2^{-\Delta\Delta CT}$  method<sup>94</sup>.

951

952 Table I: Primers used for qRT-PCR

| Species            | Target gene  | Input sequence             | Forward primer         | Reverse primer        | Probe UPL# |
|--------------------|--------------|----------------------------|------------------------|-----------------------|------------|
| <i>H. sapiens</i>  | <i>ACACB</i> | NM_001093                  | tgtcccaggtgctggact     | ctgggccacacagctcat    | 7          |
|                    | <i>TNF</i>   | X01394.1                   | cagcctcttctcctcctgat   | gccagagggctgattagaga  | 29         |
|                    | <i>HPRT</i>  | NM_000194.1                | tgacctgatttatttgcatacc | cgagcaagacgttcagtcct  | 73         |
|                    | <i>DGAT2</i> | NM_001253891;<br>NM_032564 | tactccaagcccatcaccac   | ggtgtgttacaggtcgatgac | 78         |
| <i>M. musculus</i> | <i>acacb</i> | NM_133904.2                | gcgaaaaccagatgagg      | gttctgtgtgctgcggaag   | 17         |
|                    | <i>plin3</i> | NM_025836.3                | ggaggaacctgtgtgcag     | accatccatacgtggaact   | 34         |
|                    | <i>plin2</i> | NM_007408.3                | cctcagctctcctgttaggc   | cactactgctgctgccattt  | 79         |
|                    | <i>hprt</i>  | NM_013556.2                | tcctcctcagaccgctttt    | cctggttcacatcgctaatac | 95         |
|                    | <i>cpt1b</i> | NM_009948.2                | gagtgactggtggaagaatag  | gctgctgcacatttgtgtt   | 92         |
|                    | <i>dgat2</i> | NM_026384.3                | ggcgctactccgagactac    | tggtcagcaggtgtgtgtc   | 42         |

## 953 Microarray analyses

954

955 Integrity of extracted, total RNA was analyzed with the RNA Nano 6000 Kit on a  
 956 Bioanalyzer (Agilent Technologies, Santa Clara, CA, USA) according to manufacturer's  
 957 instructions. Total RNA was used for reverse amplification and Cy3-labelling of cRNA  
 958 as well as hybridization on Agilent Mouse Whole Genome 4x44K V2 arrays and  
 959 scanning was conducted as described elsewhere<sup>95</sup>. GeneSpring version 12.6 (Agilent  
 960 Technologies) was used for analysis of data with removal of compromised probes prior  
 961 to analysis. Differences in gene expression were computed using a Moderated t-test  
 962 with a Benjamini-Hochberg multiple comparison correction cut-off of  $p \leq 0.05$  between  
 963 infected *Wnt6*<sup>+/+</sup> and *Wnt6*<sup>-/-</sup> macrophages. Gene Symbols of significantly regulated  
 964 genes (data available on request) were used to query the Molecular Signatures  
 965 Database v6.0 (<http://software.broadinstitute.org/gsea/msigdb>) for enrichment of  
 966 Reactome gene sets with a FDR q-value cut-off of  $p \leq 0.05$ .

967

968

## 969 **Immunohistochemistry**

970 Lung tissue from patients with a multi-drug resistant TB was surgically removed  
971 (University Hospital Schleswig-Holstein (UKSH), Lübeck, Germany), dissected and  
972 fixed with 10% formalin for 24-48 hours. For immunohistochemical stainings, paraffin-  
973 embedded tissue was cut in 1  $\mu\text{m}$  sections on a microtome (SM 2000R, Leica  
974 Biosystems), and sections were mounted on glass slides (SuperFrost Plus, R.  
975 Langenbrink, Emmendingen, Germany). Following de-paraffinization and antigen  
976 retrieval, which was performed at 90°C for 30 minutes in the presence of 10 mM citric  
977 acid, endogenous peroxidase activity was quenched by incubation with 3% H<sub>2</sub>O<sub>2</sub> for 10  
978 minutes. Slides were incubated in Antibody Diluent (Zytomed Systems, Berlin,  
979 Germany) in the presence of a primary antibody specific for WNT6 (purchased from  
980 Abcam (ab50030, 5  $\mu\text{g/ml}$ ) or Bio-Techne (AF4109, 6.6  $\mu\text{g/ml}$ )), CD68 (clone PG-M1,  
981 1:100, purchased from Agilent Technologies), PLIN2 (Abcam (# ab78920, 1:100), ACC2  
982 (LS-C11360; LSBio, Seattle, USA) and ACC1/2 (mAb, C83B10; Cell signalling,  
983 Frankfurt, Germany). If necessary, tissue slides were incubated in Antibody Diluent  
984 (Zytomed Systems) containing a specific secondary antibody (F(ab)<sub>2</sub> Fragment Rabbit  
985 Anti-sheep (Jackson Immoresearch, Suffolk, UK) or rabbit anti-mouse IgG (Zytomed  
986 Systems) both 1:500 in Antibody Diluent) for 30-60 minutes. For detection and  
987 visualization, a Horseradish-Peroxidase (HRP)-conjugated Polymer based detection  
988 system (ZytoChem-Plus Kit Anti-rabbit) and the chromogene 3-amino-9-ethylcarbazole  
989 (AEC) (both from Zytomed Systems) were used according to the manufacturer's  
990 instructions. Frozen lung tissue sections (5  $\mu\text{m}$ ) were air-dried, fixed (10% [v/v] ice-cold  
991 formalin) and mounted on glass slides. Subsequently, tissue was incubated for 20  
992 minutes in 20% oil red O solution (Sigma) after washing with 60% 2-propanol (Sigma)  
993 in order visualize lipid droplets by light microscopy. All slides were counterstained with  
994 Gills hematoxylin (Vector, Lörrach, Germany) and analyzed with a BX41 microscope  
995 (Olympus, Hamburg, Germany) and the NIS-Elements software (NIS-Elements D3.10,  
996 SP3; Nikon).

997

## 998 **Immunofluorescence and flow cytometry analysis**

999 For immunofluorescence analyses, cells were seeded on Chamber Slides® (Lab Tek II,  
1000 8 well, Thermo Fisher). To monitor acidification of bacteria-containing compartments,  
1001 macrophages were infected with GFP-expressing *M. tuberculosis* (see above) for 2  
1002 hours, incubated with 400 nM LysoTracker® dye (DND-99, Thermo Fisher) for 2 hours

1003 and were thoroughly washed with PBS. Subsequently, cells were fixed with 1% (w/v)  
1004 Paraformaldehyde for 24 hours (4°C). To block unspecific protein binding sites and  
1005 permeabilize cells, slides were incubated in PBS containing 10% normal serum (Pan-  
1006 Biotek) and 0.2% Triton-X100 for 1 hour. Lipid droplets and nuclei were stained with  
1007 0.2% Triton-X100/PBS containing 4,4-difluoro-1,3,5,7,8-pentamethyl-4-bora-3a,4a-  
1008 diaza-s-indacene (BODIPY 493/503, 5 µg/ml; Thermo Fisher)<sup>88</sup>, and DAPI (1 µg/ml;  
1009 Roche Applied Science), respectively, for 1 hour. For quantification of acidified,  
1010 LysoTracker<sup>®</sup> positive compartments, samples were evaluated in a blinded fashion  
1011 (counting of >300 phagosomes per condition).

1012 To compare neutral lipid content of cells by fluorescence microscopy, macrophages  
1013 were infected with mCherry-expressing *M. tuberculosis*, fixed, and stained with BODIPY  
1014 as described above. Subsequently, cells were visualized by fluorescence microscopy  
1015 and obtained images were analyzed with ImageJ software (Version 1.51n) using a  
1016 macro script (available on request). To assess relative changes in neutral lipid content,  
1017 the area of the BODIPY signal was normalized to the nuclear area of the cells. For this  
1018 purpose, nuclei were identified by DAPI staining and the nuclear area calculated for  
1019 every image. The threshold to determine the BODIPY positive area within the images  
1020 was determined by measuring the background signal within the nuclear area, which was  
1021 essentially devoid of neutral lipids. A BODIPY signal above the average background  
1022 multiplied by two times the standard deviation was considered positive. At least 200 cells  
1023 per condition in each individual experiment were analyzed.

1024 To visualize WNT6 and neutral-lipids in frozen lung tissue, sections (5 µm) were air-  
1025 dried, fixed (10% [v/v] ice-cold formalin) and mounted on glass slides. Subsequently,  
1026 unspecific protein binding sites were blocked by incubating sections with PBS containing  
1027 10% normal donkey serum (Pan-Biotek), 2% BSA and 0.2% Triton-X100 for 1 hour.  
1028 Slides were incubated sequentially with an antibody specific for WNT6 (Bio-Techne  
1029 (AF4109, 6.6 µg/ml)) and a suitable fluorescence (Cy3)-labelled secondary antibody  
1030 (AffiniPure Donkey Anti-Sheep IgG, Minimal Cross Reactions, Jackson  
1031 Immunoresearch, Cambridge, UK) for 2 and 1 hour, respectively. Neutral lipids and  
1032 nuclei were visualized by use of BODIPY (10 µg/ml) and DAPI (1 µg/ml) as described  
1033 earlier in this section. All slides were mounted with ProLong<sup>™</sup> Antifade Reagents  
1034 (Thermo Fisher), covered with glass coverslips (R. Langenbrink) and analyzed by use  
1035 of an Axio Observer microscope, equipped with an ApoTome, and the AxioVision  
1036 Software 4.8 or earlier (Carl Zeiss, Oberkochen, Germany).

1037 To quantify neutral lipids by flow cytometry, NIH3T3 cells were detached by incubation  
1038 with Accutase (Thermo Fisher) for 5 minutes at 37°C. Subsequently, cells were stained  
1039 with BODIPY (5 µg/ml) for 1 hour, washed, re-suspended in PBS containing 0.2% EDTA  
1040 and subjected to a MACS Quant Analyzer 10 (Milteny Biotec, Bergisch Gladbach,  
1041 Germany) using the Milteny MACSQuantify software (Version 2.6 or 2.8). Data was  
1042 analyzed with FCS Express v6 or earlier (De Novo Software, Glendale, CA, USA).

1043 To determine mitochondrial activity, transdifferentiated BLaER1 WT and ACC2 knockout  
1044 cells or hMDMs were either left untreated or infected at an MOI of 0.1 for 3 days. After  
1045 washing with PBS, cells were stained with the membrane potential-sensitive dye  
1046 Rhodamine 123 (25 minutes, 0.5 µg/ml) and the membrane potential-independent dye  
1047 MitoTracker® Deep Red FM (300 nM) to measure the mitochondrial activity and  
1048 mitochondrial mass, respectively (both Thermo Fisher). Cell were washed once and  
1049 immediately analyzed on the FACS Canto II (BD) using the BD Diva Software (Version  
1050 6.1.2.). Data was analyzed with FCS Express v6 or earlier (De Novo Software, Glendale,  
1051 CA, USA).

1052

### 1053 **Sample preparation and lipid extraction**

1054 For mass spectrometry based quantification of lipids from *in vitro* cultures, NIH3T3 cells  
1055 were detached and transferred into suitable tubes (SafeLock, Eppendorf, Hamburg,  
1056 Germany) in aliquots of  $0.3-0.6 \times 10^6$  cells. Subsequently, cells were washed with PBS  
1057 at 37 °C. In order to remove residual liquid, cells were centrifuged ( $10.000 \times g$ ), and dry  
1058 pellets immediately stored at -80 °C. BMDM ( $0.5 \times 10^6$ ) were incubated in the presence  
1059 of fatty acids or respective controls, washed with PBS at 37 °C, detached on ice for 1  
1060 hour, and treated and stored as described earlier for NIH3T3 cells.

1061 For shotgun lipidomics analysis of infected mouse lungs, homogenates (200 µl in PBS /  
1062 Protease-Inhibitor cocktail (Protean, Roche) were transferred into suitable tubes,  
1063 incubated in methanol (800 µl, 2 h, RT) and stored at -80 °C until lipid extraction.

1064 Total lipids were extracted according to a customized methyl-tert-butyl ether (MTBE)  
1065 method<sup>96</sup>. Briefly, samples were dried in a SpeedVac and solved in 20 µl of 50 mM  
1066 ammonium acetate. Then 270 µl methanol, containing 3% acetic acid, were added. After  
1067 vortexing the mixture, internal standard solution (either, SPLASH® Lipidomix® Mass  
1068 Spec Standard (330707, Avanti Polar Lipids, Alabaster, US) or standard mixture  
1069 according to Table II) were added. Afterwards, 1 ml of MTBE was added and the solution  
1070 was incubated for 1 hour at room temperature with continuous shaking at 600 rpm

1071 (Eppendorf, MixMate). Next, 500  $\mu$ l of water was added and subsequently incubated for  
1072 10 mins at room temperature with continuous shaking at 1300 rpm. For phase  
1073 separation, were centrifuged for 10 min at  $15.000 \times g$  and then the upper phase was  
1074 collected in a separate tube. The lower phase was re-extracted with 400  $\mu$ l theoretical  
1075 upper phase, vortexed and incubated for 20 min at room temperature with continuous  
1076 shaking (1300 rpm). The solution was once more centrifuged as described above. The  
1077 resulting upper phases were combined and subsequently dried in a SpeedVac (Thermo  
1078 Fisher Scientific, Waltham, US). The dried extracts were dissolved in a mixture of  
1079 chloroform, methanol and water (60/30/4.5; v/v/v) and stored at  $-80^{\circ}\text{C}$ .

1080

### 1081 Lipidomics

1082 Shotgun lipidomics measurements were performed using a Q Exactive (Thermo Fisher  
1083 Scientific, Bremen, Germany) or an Apex Qe Fourier Transform Ion Cyclotron  
1084 Resonance mass spectrometer (Bruker Daltonik, Bremen, Germany), both equipped  
1085 with a TriVersa NanoMate (Advion BioSciences, Ithaca, NY, USA) as autosampler and  
1086 ion source<sup>96,97</sup>. Lipid identification was performed using LipidXplorer<sup>98</sup> and quantitation  
1087 was achieved in reference to a mix of internal standards, which were added prior  
1088 extraction (Table II, SPLASH® Lipidomix® Mass Spec Standard).

1089

Table II: Internal standards used for lipid quantification of *in vitro* cultivated cells.

| Abbr.  | Substance                  | Supplier/ID    | Amount added<br>Apex Qe<br>(pmol)* | Amount added<br>Q Exactive<br>(pmol)# |
|--------|----------------------------|----------------|------------------------------------|---------------------------------------|
| SM-IS  | 17:0 SM (d18:1/17:0)       | Avanti/ 860585 | 143.4                              | 14.3                                  |
| LPC-IS | 17:0 Lyso PC               | Avanti/ 855676 | 303.7                              | 30.4                                  |
| TAG-IS | Glycerol triheptadecanoate | Sigma/ T2151   | 111.7                              | 11.2                                  |
| PE-IS  | 4ME 16:0 Diether PE        | Avanti/ 999985 | 306.7                              | 30.7                                  |
| PC-IS  | 4ME 16:0 Diether PC        | Avanti/ 999984 | 181.2                              | 18.1                                  |
| CE-IS  | 17:0 Cholesteryl Ester     | Avanti/ 110864 | 335.3                              | 33.5                                  |

1090 \* IS amounts used for the analysis with the Apex Qe instrument for Figure 2e.

1091 # IS amounts used for the analysis with Q Exactive Plus instrument for Figure 2c.

1092

1093

1094

## 1095 **Tracing experiments with <sup>13</sup>C-oleic acid**

1096 Uniformly <sup>13</sup>C-labelled oleic acid (U-13C18, 98%, Cambridge Isotope Laboratories,  
1097 Tewksbury, USA) was solubilized in ethanol (pure, for molecular biology, AppliChem)  
1098 and conjugated to BSA (<sup>13</sup>C-oleate-BSA) as described earlier in this section. Cells were  
1099 pulsed with <sup>13</sup>C-oleate-BSA during differentiation of monocytes into macrophages (see  
1100 protocol above). Subsequently, hMDMs were cultivated in the absence of isotope-  
1101 labelled substrates and infected with Mtb for 4 hours. After removing extracellular  
1102 bacteria by washing, macrophages were incubated for a total of 7 days in the absence  
1103 or presence of ACC2 inhibitor 3 (ND-646). Finally, cells were detached on ice, washed  
1104 and lysed by incubating in methanol ( $\geq 99\%$  Chromasolv™) for 2 hours at RT. Lipids  
1105 were extracted and quantified using shotgun lipidomics as described earlier. Briefly, <sup>13</sup>C-  
1106 labeled oleic acid incorporation in macrophages was traced by high resolution MS<sup>1</sup> using  
1107 the Q Exactive Plus. Incorporation rates for hMDMs were determined for the lipid classes  
1108 PC, PC-O, TAG, CE and SM using the positive ion mode (Supplement Figure I).  
1109 Quantitation was performed in reference to SPLASH® Lipidomix®. Metabolization of  
1110 <sup>13</sup>C-labeled OA in Mtb was traced using the major abundant phospholipid PI 16:0\_19:0  
1111 (TSA) with a semi-targeted lipid analysis in the negative ion mode. The isotopic labelled  
1112 <sup>12</sup>C<sub>1</sub><sup>13</sup>C<sub>18</sub> TSA fragment in MS<sup>2</sup> ( $m/z$  315.34) and the <sup>12</sup>C<sub>19</sub> signal ( $m/z$  297.28) were utilized  
1113 to determine incorporation rates (preprint: Heyckendorf et al. Biorxiv, 2020).

1114

## 1115 **Cell viability assay**

1116 Real-time impedance measurements were conducted on a xCELLigence System  
1117 (ACEA Bioscience, San Diego, USA) using plates with incorporated sensor array (E-  
1118 Plate) and the Real-Time Cell Analyzer SP instrument. Data obtained were analyzed  
1119 using the Real-Time Cell Analyzer Software 1.2 (ACEA Bioscience).

1120

## 1121 **Nitrite and cytokine quantification**

1122 To determine the production of reactive nitrogen intermediates (RNI), supernatants of *in*  
1123 *vitro* cultivated cells were harvested and the content of nitrite was determined after  
1124 adding Griess reagents by photometric measurement (absorbance at 540nm) on a  
1125 Synergy2 (Biotek) microplate reader as described previously<sup>99</sup>.

1126 To determine cytokine levels in Mtb-infected mouse lungs, homogenates were analyzed  
1127 with a bead-based assay panel (Mouse Pro-inflammatory chemokine and mouse  
1128 Inflammation Panel (LEGENDplex™), BioLegend, San Fransisco, USA) according to

1129 the manufacturer's instructions. Measurements were performed on a FACSCanto™II  
1130 (BD) flow cytometer and data were analyzed using the FCAP Array™ Software Version  
1131 3.0 (BD).

1132

### 1133 **Extracellular flux analysis**

1134  $1.5 \times 10^5$  BMDM were seeded on XF24 cell culture plates and incubated for 24h in the  
1135 presence of cell culture medium containing BSA or Oleic acid (200  $\mu$ M), which was  
1136 complexed to BSA as described above. After washing and incubation with unbuffered  
1137 DMEM containing 25 mM D-Glucose (Carl Roth, Karlsruhe, Germany) and 1 mM  
1138 Pyruvate (Merck) for 1h at 37°C, cells were subjected to a XF24 Seahorse Analyzer  
1139 (Agilent Technologies). During measurements Oligomycin (1  $\mu$ M), FCCP [carbonyl  
1140 cyanide 4-(trifluoromethoxy) phenylhydrazone] (1.5  $\mu$ M) and Rotenone/Antimycin A (1  
1141  $\mu$ M) (purchased from Agilent Technologies) were injected. Obtained data was analyzed  
1142 by use of the Seahorse XF24 Software V 1.8.1.1.

1143

### 1144 **Ethics**

1145 All experiments performed with primary human cells or human lung tissue were  
1146 reviewed and approved by the Ethics Committee of the University of Lübeck, Germany  
1147 (#14-032,#12-220,#14-225,#18-194). All animal experiments were performed according  
1148 to the German animal protection laws and were approved by the Animal Research Ethics  
1149 Board of the Ministry of Environment (Kiel, Germany).

1150

### 1151 **Statistical analysis**

1152 Statistical analyses were performed using GraphPad Prism 7 or earlier software  
1153 versions (GraphPad Software, La Jolla, CA). For statistical analyses of *in vitro*  
1154 experiments, data was log-transformed in order to assume parametric distribution<sup>100</sup>. For  
1155 group comparison, a Repeated Measure One-way ANOVA followed by Holm-Sidak  
1156 multiple comparison as post-hoc test was performed. For statistical analysis of *in vivo*  
1157 experiments, data was tested for normality, log-transformed and analyzed by an  
1158 unpaired, one-tailed<sup>101</sup> Student's t-test. \*p ,0.05, \*\*p , 0.01, \*\*\*p , 0.001. All data are  
1159 shown as mean +/- SEM.

1160

1161



1162 **References**

- 1163  
1164 1. WHO | Global tuberculosis report 2017. *WHO*  
1165 [http://www.who.int/tb/publications/global\\_report/en/](http://www.who.int/tb/publications/global_report/en/).
- 1166 2. Dheda, K. *et al.* The epidemiology, pathogenesis, transmission, diagnosis, and  
1167 management of multidrug-resistant, extensively drug-resistant, and incurable tuberculosis.  
1168 *Lancet Respir. Med.* S2213-2600(17)30079-6 (2017).
- 1169 3. Wallis, R. S. & Hafner, R. Advancing host-directed therapy for tuberculosis. *Nat. Rev.*  
1170 *Immunol.* **15**, 255–263 (2015).
- 1171 4. Reiling, N. *et al.* Shaping the niche in macrophages: Genetic diversity of the M.  
1172 tuberculosis complex and its consequences for the infected host. *Int. J. Med. Microbiol.*  
1173 *IJMM* **308(1)**:118-128 (2017).
- 1174 5. Prosser, G. *et al.* The bacillary and macrophage response to hypoxia in tuberculosis and  
1175 the consequences for T cell antigen recognition. *Microbes Infect.* **19**, 177–192 (2017).
- 1176 6. Rodríguez-Prados, J.-C. *et al.* Substrate fate in activated macrophages: a comparison  
1177 between innate, classic, and alternative activation. *J. Immunol.* **185**, 605–614 (2010).
- 1178 7. Shi, L. *et al.* Infection with *Mycobacterium tuberculosis* induces the Warburg effect in  
1179 mouse lungs. *Sci. Rep.* **5**, 18176 (2015).
- 1180 8. Tannahill, G. M. *et al.* Succinate is an inflammatory signal that induces IL-1 $\beta$  through HIF-  
1181 1 $\alpha$ . *Nature* **496**, 238–242 (2013).
- 1182 9. Jha, A. K. *et al.* Network Integration of Parallel Metabolic and Transcriptional Data Reveals  
1183 Metabolic Modules that Regulate Macrophage Polarization. *Immunity* **42**, 419–430 (2015).
- 1184 10. Gleeson, L. E. *et al.* Cutting Edge: *Mycobacterium tuberculosis* Induces Aerobic Glycolysis  
1185 in Human Alveolar Macrophages That Is Required for Control of Intracellular Bacillary  
1186 Replication. *J. Immunol.* **196**, 2444–2449 (2016).
- 1187 11. Huang, L., Nazarova, E. V., Tan, S., Liu, Y. & Russell, D. G. Growth of *Mycobacterium*  
1188 tuberculosis in vivo segregates with host macrophage metabolism and ontogeny. *J. Exp.*  
1189 *Med.* **215**, 1135–1152 (2018).

- 1190 12. Huang, Y. *et al.* Toll-like receptor agonists promote prolonged triglyceride storage in  
1191 macrophages. *J. Biol. Chem.* **289**, 3001–3012 (2014).
- 1192 13. Boström, P. *et al.* Hypoxia converts human macrophages into triglyceride-loaded foam  
1193 cells. *Arterioscler. Thromb. Vasc. Biol.* **26**, 1871–1876 (2006).
- 1194 14. Peyron, P. *et al.* Foamy macrophages from tuberculous patients' granulomas constitute a  
1195 nutrient-rich reservoir for *M. tuberculosis* persistence. *PLoS Pathog.* **4**, e1000204 (2008).
- 1196 15. Kim, M.-J. *et al.* Caseation of human tuberculosis granulomas correlates with elevated  
1197 host lipid metabolism: Lipid metabolism in human tuberculous granulomas. *EMBO Mol.*  
1198 *Med.* **2**, 258–274 (2010).
- 1199 16. Hunter, R. L., Jagannath, C. & Actor, J. K. Pathology of postprimary tuberculosis in  
1200 humans and mice: contradiction of long-held beliefs. *Tuberc. Edinb. Scotl.* **87**, 267–278  
1201 (2007).
- 1202 17. Pagel, W. & Pagel, M. Zur Histochemie der Lungentuberkulose, mit besonderer  
1203 Berücksichtigung der Fettsubstanzen und Lipide. *Virchows Arch. Für Pathol. Anat.*  
1204 *Physiol. Für Klin. Med.* **256**, 629–640 (1925).
- 1205 18. Pandey, A. K. & Sasseti, C. M. Mycobacterial persistence requires the utilization of host  
1206 cholesterol. *Proc. Natl. Acad. Sci. U. S. A.* **105**, 4376–4380 (2008).
- 1207 19. Muñoz-Elías, E. J. & McKinney, J. D. Mycobacterium tuberculosis isocitrate lyases 1 and 2  
1208 are jointly required for in vivo growth and virulence. *Nat. Med.* **11**, 638–644 (2005).
- 1209 20. Lee, W., VanderVen, B. C., Fahey, R. J. & Russell, D. G. Intracellular Mycobacterium  
1210 tuberculosis Exploits Host-derived Fatty Acids to Limit Metabolic Stress. *J. Biol. Chem.*  
1211 **288**, 6788–6800 (2013).
- 1212 21. Russell, D. G., Cardona, P.-J., Kim, M.-J., Allain, S. & Altare, F. Foamy macrophages and  
1213 the progression of the human tuberculosis granuloma. *Nat. Immunol.* **10**, 943–948 (2009).
- 1214 22. Willert, K. & Nusse, R. Wnt proteins. *Cold Spring Harb. Perspect. Biol.* **4**, a007864 (2012).
- 1215 23. Brandenburg, J. & Reiling, N. The Wnt Blows: On the Functional Role of Wnt Signaling in  
1216 Mycobacterium tuberculosis Infection and Beyond. *Front. Immunol.* **7**, (2016).

- 1217 24. Staal, F. J. T., Luis, T. C. & Tiemessen, M. M. WNT signalling in the immune system: WNT  
1218 is spreading its wings. *Nat. Rev. Immunol.* **8**, 581–593 (2008).
- 1219 25. Schaale, K. *et al.* Wnt6 is expressed in granulomatous lesions of Mycobacterium  
1220 tuberculosis-infected mice and is involved in macrophage differentiation and proliferation.  
1221 *J. Immunol.* **191**, 5182–5195 (2013).
- 1222 26. Heitmann, L. *et al.* The IL-13/IL-4R $\alpha$  axis is involved in tuberculosis-associated pathology.  
1223 *J. Pathol.* **234**, 338–350 (2014).
- 1224 27. Listenberger, L. L. & Brown, D. A. Fluorescent Detection of Lipid Droplets and Associated  
1225 Proteins. in *Current Protocols in Cell Biology* (John Wiley & Sons, Inc., 2001).
- 1226 28. Holla, S. *et al.* MUSASHI-Mediated Expression of JMJD3, a H3K27me3 Demethylase, Is  
1227 Involved in Foamy Macrophage Generation during Mycobacterial Infection. *PLoS Pathog.*  
1228 **12**, e1005814 (2016).
- 1229 29. Subramanian, A. *et al.* Gene set enrichment analysis: A knowledge-based approach for  
1230 interpreting genome-wide expression profiles. *Proc. Natl. Acad. Sci.* **102**, 15545–15550  
1231 (2005).
- 1232 30. Pepino, M. Y., Kuda, O., Samovski, D. & Abumrad, N. A. Structure-Function of CD36 and  
1233 Importance of Fatty Acid Signal Transduction in Fat Metabolism. *Annu. Rev. Nutr.* **34**,  
1234 281–303 (2014).
- 1235 31. Bu, S. Y. & Mashek, D. G. Hepatic long-chain acyl-CoA synthetase 5 mediates fatty acid  
1236 channeling between anabolic and catabolic pathways. *J. Lipid Res.* **51**, 3270–3280 (2010).
- 1237 32. Wanders, R. J. A., Ruiten, J. P. N., IJlst, L., Waterham, H. R. & Houten, S. M. The  
1238 enzymology of mitochondrial fatty acid beta-oxidation and its application to follow-up  
1239 analysis of positive neonatal screening results. *J. Inherit. Metab. Dis.* **33**, 479–494 (2010).
- 1240 33. Hunt, M. C., Siponen, M. I. & Alexson, S. E. H. The emerging role of acyl-CoA  
1241 thioesterases and acyltransferases in regulating peroxisomal lipid metabolism. *Biochim.*  
1242 *Biophys. Acta BBA - Mol. Basis Dis.* **1822**, 1397–1410 (2012).

- 1243 34. Guillou, H., Zadavec, D., Martin, P. G. P. & Jacobsson, A. The key roles of elongases and  
1244 desaturases in mammalian fatty acid metabolism: Insights from transgenic mice. *Prog.*  
1245 *Lipid Res.* **49**, 186–199 (2010).
- 1246 35. Harris, C. A. *et al.* DGAT enzymes are required for triacylglycerol synthesis and lipid  
1247 droplets in adipocytes. *J. Lipid Res.* **52**, 657–667 (2011).
- 1248 36. Bulankina, A. V. *et al.* TIP47 functions in the biogenesis of lipid droplets. *J. Cell Biol.* **185**,  
1249 641–655 (2009).
- 1250 37. Abu-Elheiga, L., Matzuk, M. M., Abo-Hashema, K. A. H. & Wakil, S. J. Continuous Fatty  
1251 Acid Oxidation and Reduced Fat Storage in Mice Lacking Acetyl-CoA Carboxylase 2.  
1252 *Science* **291**, 2613–2616 (2001).
- 1253 38. Choi, C. S. *et al.* Continuous fat oxidation in acetyl-CoA carboxylase 2 knockout mice  
1254 increases total energy expenditure, reduces fat mass, and improves insulin sensitivity.  
1255 *Proc. Natl. Acad. Sci. U. S. A.* **104**, 16480–16485 (2007).
- 1256 39. Kim, C.-W. *et al.* Acetyl CoA Carboxylase Inhibition Reduces Hepatic Steatosis but  
1257 Elevates Plasma Triglycerides in Mice and Humans: A Bedside to Bench Investigation.  
1258 *Cell Metab.* **26**, 394-406.e6 (2017).
- 1259 40. Rapino, F. *et al.* C/EBP $\alpha$  induces highly efficient macrophage transdifferentiation of B  
1260 lymphoma and leukemia cell lines and impairs their tumorigenicity. *Cell Rep.* **3**, 1153–1163  
1261 (2013).
- 1262 41. Vierbuchen, T., Bang, C., Rosigkeit, H., Schmitz, R. A. & Heine, H. The Human-  
1263 Associated Archaeon *Methanosphaera stadtmanae* Is Recognized through Its RNA and  
1264 Induces TLR8-Dependent NLRP3 Inflammasome Activation. *Front. Immunol.* **8**, 1535  
1265 (2017).
- 1266 42. Odham, G., Larsson, L. & Mårdh, P. A. Demonstration of tuberculostearic acid in sputum  
1267 from patients with pulmonary tuberculosis by selected ion monitoring. *J. Clin. Invest.* **63**,  
1268 813–819 (1979).

- 1269 43. Meena, L. S. & Kolattukudy, P. E. Expression and characterization of Rv0447c product,  
1270 potentially the methyltransferase involved in tuberculostearic acid biosynthesis in  
1271 *Mycobacterium tuberculosis*. *Biotechnol. Appl. Biochem.* **60**, 412–416 (2013).
- 1272 44. Juan, G., Cavazzoni, M., Sáez, G. T. & O'Connor, J. E. A fast kinetic method for assessing  
1273 mitochondrial membrane potential in isolated hepatocytes with rhodamine 123 and flow  
1274 cytometry. *Cytometry* **15**, 335–342 (1994).
- 1275 45. Follstad, B. D., Wang, D. I. & Stephanopoulos, G. Mitochondrial membrane potential  
1276 differentiates cells resistant to apoptosis in hybridoma cultures. *Eur. J. Biochem.* **267**,  
1277 6534–6540 (2000).
- 1278 46. Kampe, K., Sieber, J., Orellana, J. M., Mundel, P. & Jehle, A. W. Susceptibility of  
1279 podocytes to palmitic acid is regulated by fatty acid oxidation and inversely depends on  
1280 acetyl-CoA carboxylases 1 and 2. *Am. J. Physiol. Renal Physiol.* **306**, F401-409 (2014).
- 1281 47. Chan, F. K.-M., Moriwaki, K. & De Rosa, M. J. Detection of necrosis by release of lactate  
1282 dehydrogenase activity. *Methods Mol. Biol. Clifton NJ* **979**, 65–70 (2013).
- 1283 48. Chen, M. *et al.* Lipid mediators in innate immunity against tuberculosis: opposing roles of  
1284 PGE2 and LXA4 in the induction of macrophage death. *J. Exp. Med.* **205**, 2791–2801  
1285 (2008).
- 1286 49. Lerner, T. R. *et al.* *Mycobacterium tuberculosis* replicates within necrotic human  
1287 macrophages. *J Cell Biol* **216(3)**, 583-594 (2017).
- 1288 50. Dallenga, T. *et al.* M. tuberculosis-Induced Necrosis of Infected Neutrophils Promotes  
1289 Bacterial Growth Following Phagocytosis by Macrophages. *Cell Host Microbe* **22**, 519-  
1290 530.e3 (2017).
- 1291 51. Dorhoi, A. *et al.* Type I IFN signaling triggers immunopathology in tuberculosis-susceptible  
1292 mice by modulating lung phagocyte dynamics. *Eur. J. Immunol.* **44**, 2380–2393 (2014).
- 1293 52. Svensson, R. U. *et al.* Inhibition of acetyl-CoA carboxylase suppresses fatty acid synthesis  
1294 and tumor growth of non-small-cell lung cancer in preclinical models. *Nat. Med.* **22**, 1108–  
1295 1119 (2016).

- 1296 53. Rosenthal, I. M. *et al.* Dose-ranging comparison of rifampin and rifapentine in two  
1297 pathologically distinct murine models of tuberculosis. *Antimicrob. Agents Chemother.* **56**,  
1298 4331–4340 (2012).
- 1299 54. Almeida, D. *et al.* Paradoxical effect of isoniazid on the activity of rifampin-pyrazinamide  
1300 combination in a mouse model of tuberculosis. *Antimicrob. Agents Chemother.* **53**, 4178–  
1301 4184 (2009).
- 1302 55. Niazi, M. K. K. *et al.* Lung necrosis and neutrophils reflect common pathways of  
1303 susceptibility to *Mycobacterium tuberculosis* in genetically diverse, immune-competent  
1304 mice. *Dis. Model. Mech.* **8**, 1141–1153 (2015).
- 1305 56. Cao, F., Castrillo, A., Tontono, P., Re, F. & Byrne, G. I. Chlamydia pneumoniae-Induced  
1306 Macrophage Foam Cell Formation Is Mediated by Toll-Like Receptor 2. *Infect. Immun.* **75**,  
1307 753–759 (2007).
- 1308 57. Nicolaou, G., Goodall, A. H. & Erridge, C. Diverse bacteria promote macrophage foam cell  
1309 formation via Toll-like receptor-dependent lipid body biosynthesis. *J. Atheroscler. Thromb.*  
1310 **19**, 137–148 (2012).
- 1311 58. D’Avila, H. *et al.* Host cell lipid bodies triggered by *Trypanosoma cruzi* infection and  
1312 enhanced by the uptake of apoptotic cells are associated with prostaglandin E<sub>2</sub> generation  
1313 and increased parasite growth. *J. Infect. Dis.* **204**, 951–961 (2011).
- 1314 59. Almeida, P. E. *et al.* *Mycobacterium bovis* Bacillus Calmette-Guerin Infection Induces  
1315 TLR2-Dependent Peroxisome Proliferator-Activated Receptor Expression and Activation:  
1316 Functions in Inflammation, Lipid Metabolism, and Pathogenesis. *J. Immunol.* **183**, 1337–  
1317 1345 (2009).
- 1318 60. Mattos, K. A. *et al.* Lipid droplet formation in leprosy: Toll-like receptor-regulated  
1319 organelles involved in eicosanoid formation and *Mycobacterium leprae* pathogenesis. *J.*  
1320 *Leukoc. Biol.* **87**, 371–384 (2010).
- 1321 61. Feingold, K. R. *et al.* ADRP/ADFP and Mal1 expression are increased in macrophages  
1322 treated with TLR agonists. *Atherosclerosis* **209**, 81–88 (2010).

- 1323 62. Feingold, K. R. *et al.* Mechanisms of triglyceride accumulation in activated macrophages.  
1324 *J. Leukoc. Biol.* **92**, 829–839 (2012).
- 1325 63. You, J., Nguyen, A. V., Albers, C. G., Lin, F. & Holcombe, R. F. Wnt pathway-related gene  
1326 expression in inflammatory bowel disease. *Dig. Dis. Sci.* **53**, 1013–1019 (2008).
- 1327 64. Choy, D. F. *et al.* Gene Expression Patterns of Th2 Inflammation and Intercellular  
1328 Communication in Asthmatic Airways. *J. Immunol.* **186**, 1861–1869 (2011).
- 1329 65. Singh, V. *et al.* Mycobacterium tuberculosis-Driven Targeted Recalibration of Macrophage  
1330 Lipid Homeostasis Promotes the Foamy Phenotype. *Cell Host Microbe* **12**, 669–681  
1331 (2012).
- 1332 66. Ouimet, M. *et al.* Mycobacterium tuberculosis induces the miR-33 locus to reprogram  
1333 autophagy and host lipid metabolism. *Nat. Immunol.* **17**, 677–686 (2016).
- 1334 67. Dkhar, H. K. *et al.* Mycobacterium tuberculosis keto-mycolic acid and macrophage nuclear  
1335 receptor TR4 modulate foamy biogenesis in granulomas: a case of a heterologous and  
1336 noncanonical ligand-receptor pair. *J. Immunol.* **193**, 295–305 (2014).
- 1337 68. Nazarova, E. V. *et al.* Rv3723/LucA coordinates fatty acid and cholesterol uptake in  
1338 Mycobacterium tuberculosis. *eLife* **6**, e26969 (2017).
- 1339 69. Nazarova, E. V. *et al.* The genetic requirements of fatty acid import by Mycobacterium  
1340 tuberculosis within macrophages. *eLife* **8**, e43621 (2019).
- 1341 70. Daniel, J., Maamar, H., Deb, C., Sirakova, T. D. & Kolattukudy, P. E. Mycobacterium  
1342 tuberculosis uses host triacylglycerol to accumulate lipid droplets and acquires a  
1343 dormancy-like phenotype in lipid-loaded macrophages. *PLoS Pathog.* **7**, e1002093 (2011).
- 1344 71. Brok, M. H. den, Raaijmakers, T. K., Collado-Camps, E. & Adema, G. J. Lipid Droplets as  
1345 Immune Modulators in Myeloid Cells. *Trends Immunol.* **39**, 380–392 (2018).
- 1346 72. Pol, A., Gross, S. P. & Parton, R. G. Biogenesis of the multifunctional lipid droplet: Lipids,  
1347 proteins, and sites. *J. Cell Biol.* **204**, 635–646 (2014).

- 1348 73. Knight, M., Braverman, J., Asfaha, K., Gronert, K. & Stanley, S. Lipid droplet formation in  
1349 *Mycobacterium tuberculosis* infected macrophages requires IFN- $\gamma$ /HIF-1 $\alpha$  signaling and  
1350 supports host defense. *PLoS Pathog.* **14**, e1006874 (2018).
- 1351 74. Behar, S. M. *et al.* Apoptosis is an innate defense function of macrophages against  
1352 *Mycobacterium tuberculosis*. *Mucosal Immunol.* **4**, 279–287 (2011).
- 1353 75. Magtanong, L., Ko, P. J. & Dixon, S. J. Emerging roles for lipids in non-apoptotic cell  
1354 death. *Cell Death Differ.* **23**, 1099–1109 (2016).
- 1355 76. Pulford, K. A., Sipos, A., Cordell, J. L., Stross, W. P. & Mason, D. Y. Distribution of the  
1356 CD68 macrophage/myeloid associated antigen. *Int. Immunol.* **2**, 973–980 (1990).
- 1357 77. Wang, Q. *et al.* Wnt6 Is Essential for Stromal Cell Proliferation During Decidualization in  
1358 Mice. *Biol. Reprod.* **88**, (2013).
- 1359 78. Fallon, P. G., Emson, C. L., Smith, P. & McKenzie, A. N. IL-13 overexpression  
1360 predisposes to anaphylaxis following antigen sensitization. *J. Immunol. Baltim. Md 1950*  
1361 **166**, 2712–2716 (2001).
- 1362 79. Zhang, X., Goncalves, R. & Mosser, D. M. The isolation and characterization of murine  
1363 macrophages. *Curr. Protoc. Immunol. Ed. John E Coligan AI Chapter 14*, Unit 14.1 (2008).
- 1364 80. Stanley, E. R. Murine Bone Marrow-Derived Macrophages. in *Animal Cell Culture* 299–302  
1365 (Humana Press, 1990). doi:10.1385/0-89603-150-0:299.
- 1366 81. Steinhäuser, C. *et al.* Immunomagnetic isolation of pathogen-containing phagosomes and  
1367 apoptotic blebs from primary phagocytes. *Curr. Protoc. Immunol.* **105**, 14.36.1-26 (2014).
- 1368 82. Gautier, E. L. *et al.* Gene-expression profiles and transcriptional regulatory pathways that  
1369 underlie the identity and diversity of mouse tissue macrophages. *Nat. Immunol.* **13**, 1118–  
1370 1128 (2012).
- 1371 83. Reiling, N. *et al.* Clade-Specific Virulence Patterns of *Mycobacterium tuberculosis*  
1372 Complex Strains in Human Primary Macrophages and Aerogenically Infected Mice. *mBio*  
1373 **4**, e00250-13 (2013).



- 1374 84. Song, H., Sandie, R., Wang, Y., Andrade-Navarro, M. A. & Niederweis, M. Identification of  
1375 outer membrane proteins of Mycobacterium tuberculosis. *Tuberc. Edinb. Scotl.* **88**, 526–  
1376 544 (2008).
- 1377 85. Kolbe, K. *et al.* Azido Pentoses: A New Tool To Efficiently Label Mycobacterium  
1378 tuberculosis Clinical Isolates. *Chembiochem Eur. J. Chem. Biol.* **18**, 1172–1176 (2017).
- 1379 86. Zelmer, A. *et al.* A new in vivo model to test anti-tuberculosis drugs using fluorescence  
1380 imaging. *J. Antimicrob. Chemother.* dks161 (2012) doi:10.1093/jac/dks161.
- 1381 87. Reiling, N. *et al.* Cutting Edge: Toll-Like Receptor (TLR)2- and TLR4-Mediated Pathogen  
1382 Recognition in Resistance to Airborne Infection with Mycobacterium tuberculosis. *J.*  
1383 *Immunol.* **169**, 3480–3484 (2002).
- 1384 88. Listenberger, L. L. & Brown, D. A. Fluorescent detection of lipid droplets and associated  
1385 proteins. *Curr. Protoc. Cell Biol. Editor. Board Juan Bonifacino AI Chapter 24*, Unit 24.2  
1386 (2007).
- 1387 89. Chu, V. T. *et al.* Increasing the efficiency of homology-directed repair for CRISPR-Cas9-  
1388 induced precise gene editing in mammalian cells. *Nat. Biotechnol.* **33**, 543–548 (2015).
- 1389 90. Brinkman, E. K., Chen, T., Amendola, M. & van Steensel, B. Easy quantitative assessment  
1390 of genome editing by sequence trace decomposition. *Nucleic Acids Res.* **42**, e168–e168  
1391 (2014).
- 1392 91. Popp, M. W. & Maquat, L. E. Leveraging Rules of Nonsense-Mediated mRNA Decay for  
1393 Genome Engineering and Personalized Medicine. *Cell* **165**, 1319–1322 (2016).
- 1394 92. Neumann, J. *et al.* Frizzled1 is a marker of inflammatory macrophages, and its ligand  
1395 Wnt3a is involved in reprogramming Mycobacterium tuberculosis-infected macrophages.  
1396 *FASEB J. Off. Publ. Fed. Am. Soc. Exp. Biol.* **24**, 4599–4612 (2010).
- 1397 93. Tellmann, G. The E-Method: a highly accurate technique for gene-expression analysis.  
1398 *Nat. Methods Appl. Notes* i–ii (2006) doi:10.1038/nmeth894.
- 1399 94. Livak, K. J. & Schmittgen, T. D. Analysis of relative gene expression data using real-time  
1400 quantitative PCR and the 2(-Delta Delta C(T)) Method. *Methods San Diego Calif* **25**, 402–  
1401 408 (2001).

- 1402 95. Marwitz, S. *et al.* Downregulation of the TGF $\beta$  Pseudoreceptor BAMBI in Non-Small Cell  
1403 Lung Cancer Enhances TGF $\beta$  Signaling and Invasion. *Cancer Res.* **76**, 3785–3801 (2016).
- 1404 96. Eggers, L. F. & Schwudke, D. Shotgun Lipidomics Approach for Clinical Samples.  
1405 *Methods Mol. Biol. Clifton NJ* **1730**, 163–174 (2018).
- 1406 97. Graessler, J. *et al.* Top-down lipidomics reveals ether lipid deficiency in blood plasma of  
1407 hypertensive patients. *PLoS One* **4**, e6261 (2009).
- 1408 98. Herzog, R. *et al.* A novel informatics concept for high-throughput shotgun lipidomics based  
1409 on the molecular fragmentation query language. *Genome Biol.* **12**, R8 (2011).
- 1410 99. Hölscher, C. *et al.* Defective Nitric Oxide Effector Functions Lead to Extreme Susceptibility  
1411 of Trypanosoma cruzi-Infected Mice Deficient in Gamma Interferon Receptor or Inducible  
1412 Nitric Oxide Synthase. *Infect. Immun.* **66**, 1208–1215 (1998).
- 1413 100. Willems, E., Leyns, L. & Vandesompele, J. Standardization of real-time PCR gene  
1414 expression data from independent biological replicates. *Anal. Biochem.* **379**, 127–129  
1415 (2008).
- 1416 101. Jones, L. V. & Tukey, J. W. A sensible formulation of the significance test. *Psychol.*  
1417 *Methods* **5**, 411–414 (2000).
- 1418
- 1419
